# Supplementary material for: HORYZONS trial: protocol for a randomised controlled trial of a moderated online social therapy to maintain treatment effects from first-episode psychosis services
Source: PubMed Central journal article supplement — BMJ Open. 2019 Feb 3;9(2):e024104. doi: 10.1136/bmjopen-2018-024104 (PMC6368148; doi:10.1136/bmjopen-2018-024104), 2019-02-03
Supplement: bmjopen-2018-024104.draft_revisions.pdf [file bmjopen-2018-024104.draft_revisions.pdf]

# BMJ Open

BMJ Open is committed to open peer review. As part of this commitment we make the peer review history of every article we publish publicly available.

When an article is published we post the peer reviewers' comments and the authors' responses online. We also post the versions of the paper that were used during peer review. These are the versions that the peer review comments apply to.

The versions of the paper that follow are the versions that were submitted during the peer review process. They are not the versions of record or the final published versions. They should not be cited or distributed as the published version of this manuscript.

BMJ Open is an open access journal and the full, final, typeset and author-corrected version of record of the manuscript is available on our site with no access controls, subscription charges or pay-per-view fees (<http://bmjopen.bmj.com>).

If you have any questions on BMJ Open's open peer review process please email [info.bmjopen@bmj.com](mailto:info.bmjopen@bmj.com)

# BMJ Open

## The Horyzons trial: Protocol for a Randomised Controlled Trial of a Moderated Online Social Therapy to Maintain Treatment Effects from First Episode Psychosis Services

|                               |                                                                                                                                                                                                                                                                                                                                                                                                                                                                                                                                                                                                                                                                                                                                                                                                                                                                                                                                                                                                                                                                                                                                                                                                                                                                                                                                                                                                                                                                                                                                                                                                                                                                                                                                                                                                                                                                                                                                                                                                                                                                                                                                                                                                                                                                                              |
|-------------------------------|----------------------------------------------------------------------------------------------------------------------------------------------------------------------------------------------------------------------------------------------------------------------------------------------------------------------------------------------------------------------------------------------------------------------------------------------------------------------------------------------------------------------------------------------------------------------------------------------------------------------------------------------------------------------------------------------------------------------------------------------------------------------------------------------------------------------------------------------------------------------------------------------------------------------------------------------------------------------------------------------------------------------------------------------------------------------------------------------------------------------------------------------------------------------------------------------------------------------------------------------------------------------------------------------------------------------------------------------------------------------------------------------------------------------------------------------------------------------------------------------------------------------------------------------------------------------------------------------------------------------------------------------------------------------------------------------------------------------------------------------------------------------------------------------------------------------------------------------------------------------------------------------------------------------------------------------------------------------------------------------------------------------------------------------------------------------------------------------------------------------------------------------------------------------------------------------------------------------------------------------------------------------------------------------|
| Journal:                      | <i>BMJ Open</i>                                                                                                                                                                                                                                                                                                                                                                                                                                                                                                                                                                                                                                                                                                                                                                                                                                                                                                                                                                                                                                                                                                                                                                                                                                                                                                                                                                                                                                                                                                                                                                                                                                                                                                                                                                                                                                                                                                                                                                                                                                                                                                                                                                                                                                                                              |
| Manuscript ID                 | bmjopen-2018-024104                                                                                                                                                                                                                                                                                                                                                                                                                                                                                                                                                                                                                                                                                                                                                                                                                                                                                                                                                                                                                                                                                                                                                                                                                                                                                                                                                                                                                                                                                                                                                                                                                                                                                                                                                                                                                                                                                                                                                                                                                                                                                                                                                                                                                                                                          |
| Article Type:                 | Protocol                                                                                                                                                                                                                                                                                                                                                                                                                                                                                                                                                                                                                                                                                                                                                                                                                                                                                                                                                                                                                                                                                                                                                                                                                                                                                                                                                                                                                                                                                                                                                                                                                                                                                                                                                                                                                                                                                                                                                                                                                                                                                                                                                                                                                                                                                     |
| Date Submitted by the Author: | 20-Jun-2018                                                                                                                                                                                                                                                                                                                                                                                                                                                                                                                                                                                                                                                                                                                                                                                                                                                                                                                                                                                                                                                                                                                                                                                                                                                                                                                                                                                                                                                                                                                                                                                                                                                                                                                                                                                                                                                                                                                                                                                                                                                                                                                                                                                                                                                                                  |
| Complete List of Authors:     | <p>Alvarez-Jimenez , Mario; Orygen, The National Centre of Excellence in Youth Mental Health; University of Melbourne, Centre for Youth Mental Health</p> <p>Bendall, Sarah; Orygen, The National Centre of Excellence in Youth Mental Health</p> <p>Koval, Peter; University of Melbourne, Melbourne School of Psychological Sciences</p> <p>Rice, Simon; University of Melbourne; Orygen, The National Centre of Excellence in Youth Mental Health</p> <p>Cagliarini, Daniela; Orygen, The National Centre of Excellence in Youth Mental Health; Orygen, The National Centre of Excellence in Youth Mental Health</p> <p>Valentine, Lee; Orygen, The National Centre of Excellence in Youth Mental Health; University of Melbourne, Centre for Youth Mental Health</p> <p>D'Alfonso, Simon; Orygen, The National Centre of Excellence in Youth Mental Health; University of Melbourne, School of Computing and Information Systems</p> <p>Miles, Christopher; Orygen, The National Centre of Excellence in Youth Mental Health; University of Melbourne, Centre for Youth Mental Health</p> <p>Russon, Penni; Orygen, The National Centre of Excellence in Youth Mental Health; University of Melbourne, Centre for Youth Mental Health</p> <p>Lederman, Reeve; University of Melbourne, School of Computing and Information Systems</p> <p>Wadley, Greg; University of Melbourne, School of Computing and Information Systems</p> <p>Killackey, Eoin; Orygen, The National Centre of Excellence in Youth Mental Health; University of Melbourne, Centre for Youth Mental Health</p> <p>Santesteban-Echarri, Olga; University of Calgary; Orygen, The National Centre of Excellence in Youth Mental Health</p> <p>Mihalopoulos, Cathrine; Deakin University, Deakin Health Economics, Faculty of Health</p> <p>Herrman, Helen; Orygen, The National Centre of Excellence in Youth Mental Health; University of Melbourne, Centre for Youth Mental Health</p> <p>Gonzalez-Blanch, Cesar; University Hospital Marques de Valdecilla-IDIVAL</p> <p>Gilbertson, Tamsyn; Orygen, The National Centre of Excellence in Youth Mental Health; University of Melbourne, Centre for Youth Mental Health</p> <p>Lal, Shalini; Universite de Montreal,</p> <p>Chambers, Richard; Monash University</p> |

1  
2  
3  
4  
5  
6  
7  
8  
9  
10  
11  
12  
13  
14  
15  
16  
17  
18  
19  
20  
21  
22  
23  
24  
25  
26  
27  
28  
29  
30  
31  
32  
33  
34  
35  
36  
37  
38  
39  
40  
41  
42  
43  
44  
45  
46  
47  
48  
49  
50  
51  
52  
53  
54  
55  
56  
57  
58  
59  
60

|                  |                                                                                                                                                                                                                                                                                                                                                                                                                                                                                                                                                                                          |
|------------------|------------------------------------------------------------------------------------------------------------------------------------------------------------------------------------------------------------------------------------------------------------------------------------------------------------------------------------------------------------------------------------------------------------------------------------------------------------------------------------------------------------------------------------------------------------------------------------------|
|                  | <p>Daglas, Rothanthi; Orygen, The National Centre of Excellence in Youth Mental Health; University of Melbourne, Centre for Youth Mental Health<br/> Latorre, Cristina; University Hospital 'Virgen del Rocio'<br/> Cotton, Sue; Orygen, The National Centre of Excellence in Youth Mental Health; University of Melbourne, Centre for Youth Mental Health<br/> McGorry, Patrick; Orygen, The National Centre of Excellence in Youth Mental Health; University of Melbourne, Centre for Youth Mental Health<br/> Gleeson, John; Australian Catholic University, School of Psychology</p> |
| <p>Keywords:</p> | <p>Schizophrenia &amp; psychotic disorders &lt; PSYCHIATRY, PSYCHIATRY, MENTAL HEALTH</p>                                                                                                                                                                                                                                                                                                                                                                                                                                                                                                |
|                  |                                                                                                                                                                                                                                                                                                                                                                                                                                                                                                                                                                                          |

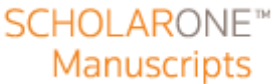

1  
2  
3 The Horyzons trial: Protocol for a Randomised Controlled Trial of a Moderated  
4 Online Social Therapy to Maintain Treatment Effects from First Episode  
5 Psychosis Services  
6  
7  
8  
9  
10  
11

12 Alvarez-Jimenez M.,<sup>1,2</sup> Bendall S.,<sup>1,2</sup> Koval P.,<sup>3</sup> Rice S.,<sup>1,2</sup> Cagliarini D.,<sup>1,2</sup> Valentine  
13 L.,<sup>1,2</sup> D'Alfonso S.,<sup>1,4</sup> Miles C.,<sup>1,2</sup> Russon P.,<sup>1,2</sup> Lederman R.,<sup>4</sup> Wadley G.,<sup>4</sup> Killackey  
14 E.,<sup>1,2</sup> Santesteban O.,<sup>1,5</sup> Mihalopoulos C.,<sup>6</sup> Herrman H.,<sup>1,2</sup> Gonzalez-Blanch C.,<sup>7</sup>  
15 Gilbertson T.,<sup>1,2</sup> Lal S.,<sup>8-10</sup> Chambers R.,<sup>11</sup> Daglas-Georgiou R.,<sup>1,2</sup> Latorre C.,<sup>12</sup>  
16 Cotton SM.,<sup>1,2</sup> McGorry PD.,<sup>1,2</sup>, Gleeson JF.<sup>13</sup>  
17  
18  
19  
20  
21  
22

23 **Affiliation:**

- 24 (1) Orygen, The National Centre of Excellence in Youth Mental Health, Melbourne,  
25 Australia  
26 (2) Centre for Youth Mental Health, The University of Melbourne, Australia  
27 (3) Melbourne School of Psychological Sciences, The University of Melbourne  
28 (4) School of Computing and Information Systems, The University of Melbourne  
29 (5) Cumming School of Medicine, University of Calgary, Calgary, AB, Canada  
30 (6) Deakin University, School of Health and Social Development,, Australia  
31 (7) University Hospital Marques de Valdecilla-IDIVAL, Santander, Spain  
32 (8) School of Rehabilitation, Faculty of Medicine, University of Montreal, Montreal, QC,  
33 Canada  
34 (9) University of Montreal Hospital Research Center, Health Innovation and Evaluation  
35 Hub, Montreal, QC, Canada  
36 (10) Douglas Mental Health University Institute, Montreal, QC, Canada  
37 (11) Monash University, Melbourne, Australia  
38 (12) University Hospital 'Virgen del Rocio', Seville, Spain  
39 (13) Australian Catholic University, School of Psychology, Melbourne, Australia  
40  
41

42 Corresponding author: [mario.alvarez@orygen.org.au](mailto:mario.alvarez@orygen.org.au)  
43

44 **Word Count**

45 7593  
46  
47  
48  
49  
50  
51  
52  
53  
54  
55  
56  
57  
58  
59  
60

## ABSTRACT

**Introduction:** Specialised early intervention services have demonstrated improved outcomes in first episode psychosis (FEP); however, clinical gains may not be sustained after patients are transferred to regular care. Moreover, many FEP patients remain socially isolated with poor functional outcomes. To address this, our multidisciplinary team has developed a moderated online social media therapy (HORYZONS) designed to enhance social functioning and maintain clinical gains from specialist FEP services. HORYZONS merges: (i) peer-to-peer social networking; (ii) tailored therapeutic interventions; (iii) expert and peer-moderation; and (iv) new models of psychological therapy (strengths and mindfulness-based interventions) targeting social functioning. The aim of this trial is to determine whether, following two years of specialised support, and 18-month online social media-based intervention (HORYZONS) is superior to 18 months of regular care.

**Methods and analysis:** This study is a single-blind randomised controlled trial. The treatment conditions include HORYZONS plus Treatment as Usual (TAU) or TAU alone. We recruited 170 young people with FEP, aged 16-27 years, in clinical remission and nearing discharge from EPPIC, Melbourne. The study includes four assessment time points, namely, baseline, 6, 12 and 18-month follow-up. The study is due for completion in July 2018 and included a 40-month recruitment period and an 18-month treatment phase. The primary outcome is social functioning at 18 months. Secondary outcome measures include rate of hospital admissions, cost-effectiveness, vocational status, depression, social support, loneliness, self-esteem, self-efficacy, anxiety, psychological wellbeing, satisfaction with life, quality of life, positive and negative psychotic symptoms and substance use. Social functioning will be also assessed in real time through our Smartphone Ecological Momentary Assessment (SEMA) tool.

**Ethics and dissemination:** Melbourne Health Human Research Ethics Committee (2013.146) provided ethics approval for this study. Findings will be made available through scientific journals and forums, and to the public via social media and the Orygen website.

**Trial registration:** ANZCTR; ACTRN12614000009617

## STRENGTHS AND LIMITATIONS OF THIS STUDY

- This is the first randomised controlled trial to evaluate the effectiveness of an online intervention designed to extend the benefits of specialised early psychosis services
- HORYZONS is the first intervention to harness online social media technology and use strengths and mindfulness-based interventions to improve long-term recovery in early psychosis
- HORYZONS was developed by a multidisciplinary team in partnership with young people, with the purpose of being scalable across, and embedded within, early intervention services
- In line with recent clinical trials evaluating extended models of care for early psychosis services, the control intervention consists of routine care as opposed to a placebo intervention accounting for increased attention and unspecific therapeutic factors
- Due to the nature of psychosocial interventions, participants and clinicians were not blind to treatment allocation

## INTRODUCTION

Psychosis can be a devastating mental health disorder. Onset is often in adolescence and early adulthood and in many cases follows a chronic and relapsing course that results in great personal suffering and societal costs[1-2]. Against this daunting picture, early intervention is now seen as the most promising and evidence-based approach to improve the long-term outcomes of psychosis[3]. Specialist First Episode Psychosis (FEP) services originated in the early 1990s with a focus on reducing treatment delays, providing youth friendly, phase-specific support and preventing the development of long-term functional and social disability[3]. Over the past two decades, several randomised controlled trials (RCTs) conducted across countries and mental health systems have demonstrated that these services improve psychotic symptoms, reduce relapse rates, foster patient satisfaction and result in tangible economic benefits[4-8].

There are limits, however, to the impact of early intervention services. First, specialist FEP services typically have treatment resources for 2 years, and recent reports indicate that the benefits of early intervention seen at the end of 2 years may not persist at 3 years post-discharge[9-10]. Second, even after receiving specialized services, functional recovery lags behind symptomatic remission, and many young people with FEP experience significant social functioning deficits and poor quality of life[11]. Indeed, the onset of psychosis has been characterized as a 'social network crisis'[12], which is not improved by early intervention services. Young people with psychosis have smaller social networks, fewer people to turn to in a crisis[13], are between 5 and 9 times less likely to have confidants compared with their peers[14], and report on average 2-3 lonely days per week[15]. Smaller social networks and lower perceived social support are, in turn, predictive of poorer long-term functional outcomes, shorter time in remission, and increased hospital admissions[16-18]. Taken together, these research findings underscore the need for new treatment approaches that extend the benefits of early intervention services and, ultimately, promote long-term social recovery.

While difficulties with social functioning are commonplace following FEP and can lead to poor long-term outcomes, very few studies have assessed interventions targeting social functioning as a primary outcome. The most researched psychological intervention for FEP

1  
2  
3 has been cognitive behavioural therapy, which is primarily focused on reducing the positive  
4 symptoms of psychosis[19]. Recognizing this gap, a recent trial evaluated a social recovery  
5 therapy in combination with early intervention services to enhance social recovery in FEP  
6 [19]. Study results showed an improvement in structured activity in those receiving the  
7 intervention relative to those receiving early intervention services alone. The renewed focus  
8 on social recovery is also consistent with recent psychological models, which have proposed  
9 self-efficacy[20-21] and positive emotions[22] as important targets to promote social  
10 functioning in psychosis. Strengths- and mindfulness-based interventions have been put  
11 forward as key interventions to increase self-efficacy and positive emotions[23], respectively,  
12 with preliminary studies supporting their potential to improve social functioning in  
13 psychosis[24-25].

14  
15  
16  
17  
18  
19  
20  
21  
22 A complementary approach to improving long-term recovery in FEP is to extend the  
23 duration of specialised treatment[26-27]. This view is underpinned by findings that the first 5  
24 years after psychosis onset constitute a critical period, determining longer term outcomes[27-  
25 28]. Similarly, promoting sustained social and functional recovery in the early course of  
26 psychosis appears to be a key path towards long-term functional recovery[29]. Two recent  
27 randomised controlled trials have evaluated the effects of the current model of early  
28 intervention (i.e., 2 years of specialised treatment) vs. an extended model of care (i.e., 5 years  
29 of specialised treatment)[30-31] with mixed results. In one of these trials, the extended model  
30 of care improved length of remission of positive and negative symptoms relative to regular  
31 care[31]. Conversely, a second study showed no significant improvements in clinical or  
32 social outcomes associated with the extended model of care[30]. An additional clinical trial  
33 examined the effects of prolonging the period of specialised care for 12 months (i.e., three  
34 years vs. two years of specialised treatment)[32]. This study showed significant  
35 improvements in functional outcomes at the end of the 3-year compared with 2-year  
36 specialised support. However, treatment benefits were not sustained, with no significant  
37 differences across treatment groups at 1 and 2 years post specialised intervention[32].

38  
39  
40  
41  
42  
43  
44  
45  
46  
47  
48  
49  
50 An alternative to prolonging the duration of specialised intervention is to offer extended,  
51 lower intensity maintenance treatment following the first two years of specialised  
52 treatment[27]. This is supported by findings that the termination of the specialised  
53 intervention and transfer of care brings about feelings of loss for the patients[9] and  
54 significantly derails engagement with treatment services[33], a pivotal element of early  
55  
56  
57  
58  
59  
60



1  
2  
3 intervention programmes. Thus, a lower intensity level of care may bridge the gap between  
4 specialised intervention and standard treatment and provide a cost-effective alternative to  
5 bring about sustained benefits in FEP. This approach has shown promising results in a single  
6 group study, with improvements seen at 2 years (i.e., end of specialised care) being  
7 maintained at 5 years (i.e., after 3 years of lower intensity specialised treatment)[27].  
8  
9  
10

11  
12 Online- and mobile-based interventions can also provide a lower intensity, cost-effective  
13 and engaging approach to prolonging the benefits of specialised FEP services. Indeed, the  
14 extant research shows that online interventions are feasible, acceptable, and may improve a  
15 range of important domains in psychosis treatment including psychotic symptoms, hospital  
16 admissions, social connectedness, and depression[34-35]. However, most studies conducted  
17 to date have employed uncontrolled designs, were underpowered, included short follow-up  
18 periods, targeted people with chronic schizophrenia, did not use online social media, and did  
19 not specifically target social functioning[34]. To the best of our knowledge, only one pilot  
20 study has evaluated the acceptability and preliminary benefits of an online intervention in  
21 young people with FEP[36].  
22  
23  
24  
25  
26  
27  
28  
29

30  
31 Finally, online social networks provide a particularly promising avenue to foster social  
32 functioning in young people with FEP. A recent study revealed that 89% of young people  
33 aged 18-29 use social media daily[37], a frequency that is on the rise[38]. Use of online  
34 social media has been associated with increased life satisfaction[39], self-esteem[39], and  
35 social capital[40], as well as lower loneliness and depression[41], particularly for those who  
36 post content to the social network and are active users[42]. Recent surveys indicate that social  
37 media habits of young people with psychosis resemble that of their peers: virtually all  
38 regularly use social media, on average 10 times and 2 hours per day[43-44]. Particularly  
39 relevant to the therapeutic potential of social media in FEP, 78% would like to obtain help  
40 from clinicians via social media, 40% increase their use of social media when experiencing  
41 symptoms[43] and the majority strongly agree with using social media as a platform from  
42 mental health support[45]. Thus, coupled with psychological interventions specifically  
43 addressing social recovery such as strengths- and mindfulness-based approaches, social  
44 media provides an opportunity deliver acceptable, extended lower intensity support with  
45 potential to foster long term social functioning in FEP.  
46  
47  
48  
49  
50  
51  
52  
53  
54  
55

## 56 **Aims and hypotheses**

57  
58  
59  
60

1  
2  
3 The objective of this trial was to determine whether extending the treatment period of a  
4 specialised FEP service through an 18-month, step-down, novel online social media-based  
5 intervention (HORYZONS) produces better outcomes compared with 2 years of specialist  
6 FEP treatment followed by treatment as usual (TAU), using a randomised controlled single-  
7 blind design. An additional aim of this trial is to determine the cost-effectiveness of  
8 HORYZONS.  
9  
10  
11  
12  
13

14 The primary hypothesis is that, relative to TAU, HORYZONS will lead to improved social  
15 functioning at 18 months amongst young people with FEP. The secondary hypotheses are  
16 that, relative to TAU, HORYZONS will reduce the rate of hospital admissions due to  
17 psychotic symptoms and lead to improvements in depression, vocational outcomes,  
18 satisfaction with life, social support, loneliness, self-esteem, self-efficacy, anxiety, stress,  
19 positive and negative psychotic symptoms, psychological wellbeing, quality of life, and  
20 substance use. Finally, we hypothesise that HORYZONS will be more cost-effective than  
21 TAU.  
22  
23  
24  
25  
26  
27  
28

## 29 **METHODS AND ANALYSIS**

### 30 **Patient and public involvement**

31  
32  
33 Young people with lived experience were extensively involved in the design of the  
34 HORYZONS system, with continuous consultation and co-design activities over the  
35 development period. In addition, as noted above, young people played a key role in the  
36 delivery of the intervention, with peer supporters actively managing the social network,  
37 the group online problem-solving feature ('Talk it out') as well as providing one on one peer  
38 support via the online chat system.  
39  
40  
41  
42  
43

44 Orygen integrates youth reference and consultation groups whose role is to provide advice  
45 on all research activities conducted at the centre. Both groups were involved in the design of  
46 the study as well as the evaluation of the face validity of the questionnaires. Patients were not  
47 involved in the recruitment of participants into the study.  
48  
49  
50

51 Online moderators regularly consulted with patients to ensure that the intervention did not  
52 result in increased perceived burden for the participants. Moderators and participants  
53 collaboratively developed a shared formulation with explicit and agreed expectations for  
54 frequency of use and support from moderators and peer supporters.  
55  
56  
57  
58  
59  
60

1  
2  
3 The results of the study will be disseminated via the Orygen website. In addition,  
4 participants will be notified via a text message at the point the results become available.  
5  
6  
7

## 8 9 **Study design**

10 The study design is an 18-month, parallel groups, single-blind, randomised controlled trial  
11 (RCT) in which 170 participants with remitted FEP have been allocated to either the current  
12 mainstream model of early intervention for psychosis (i.e., 2 years of specialised treatment  
13 followed by discharge to treatment as usual; TAU), or TAU in tandem with a moderated  
14 online social media intervention (HORYZONS), for 18 months.  
15  
16  
17  
18

19  
20 The design includes four assessment time points: baseline, 6 months, 12 months and 18  
21 months. The RCT includes a 40-month recruitment period and an 18-month treatment phase,  
22 with the study being completed within 5 years. The protocol development addressed all  
23 aspects of Good Clinical Practice[46], CONSORT EHEALTH criteria[47] and SPIRIT  
24 guidelines[48].  
25  
26  
27  
28

## 29 30 **Setting**

31  
32 Recruitment of the trial participants commenced in October 2013, with the first participant  
33 enrolled 29 November 2013, and finalised in January 2017 at Early Psychosis Prevention and  
34 Intervention Centre (EPPIC), a subprogram of Orygen Youth Health, Melbourne. EPPIC is a  
35 publicly-funded specialist FEP program servicing 250 new referrals for FEP per year. EPPIC  
36 provides 18 months to 2 years of specialised care after which patients are discharged and  
37 transferred to treatment as usual[49]. Follow-up assessments will be concluded in July 2018.  
38  
39  
40  
41  
42

## 43 44 **Participants**

45 Inclusion criteria for participants were: (a) a first episode of a DSM-IV psychotic disorder  
46 or mood disorder with psychotic features; (b) aged 16-27 years inclusive; (c)  $\leq 6$  months  
47 treatment with an antipsychotic medication prior to registration with EPPIC; (d) remission of  
48 positive symptoms of psychosis, defined, using the Positive and Negative Syndrome Scale  
49 (PANSS)[50], as 4 weeks or more of scores of 3 (mild) or below on items P2 (conceptual  
50 disorganization) and G9 (unusual thought content), and scores of 4 (moderate) or below with  
51 no functional impairment on items P3 (hallucinatory behaviour) and P1 (delusions).  
52 Additional inclusion criteria to ensure low level of risk within HORYZONS included: (f) low  
53  
54  
55  
56  
57  
58  
59  
60

1  
2  
3 aggressiveness, defined by a score of 3 or below on the poor impulse control item of the  
4 PANNS for the month prior to study entry; and (g) moderate or lower suicidal risk defined as  
5 a score of 4 or below on the suicidality subscale of the Brief Psychiatric Rating Scale –  
6 expanded version (BPRS)[51] for the month preceding study entry. Finally, participants were  
7 required to nominate an emergency contact to be eligible for the study.  
8  
9  
10

11  
12 Exclusion criteria included: (a) intellectual disability; and (b) inability to converse in or  
13 read English. Additional exclusion criteria to ensure safety within the online system included  
14 (c) a DSM-IV diagnosis of either antisocial personality disorder (ASPD); or (d) borderline  
15 personality disorder (BPD) as well as clinical evidence that the BPD features cause  
16 interpersonal difficulties in the treatment environment.  
17  
18  
19  
20

21  
22 The SCID-I/P[52] was used as the standardized measure of DSM-IV diagnosis of mental  
23 illness. The BPD (13 items) and Conduct Disorder/ASPD (22 items) screening questions of  
24 the SCID-II Personality Questionnaire were used to assess for BPD and ASPD[53].  
25  
26  
27

28  
29 Withdrawal from the trial occurred if: (a) participation in the study interfered with  
30 appropriate clinical management of risk of harm to self or others (as judged by the treating  
31 clinicians and/or senior researchers); (b) serious adverse events developed that could be  
32 associated with the online intervention; and (c) participants failed to comply with the terms of  
33 use of the online intervention. Withdrawal from the study could be at the request of the  
34 participant, or at the discretion of the investigator.  
35  
36  
37  
38  
39

## 40 **Enrolment and randomisation**

41  
42 The recruitment and allocation procedures are depicted in Figure 1. The study coordinator  
43 liaised with the Orygen Youth Health Quality and Evaluation Unit to obtain a list of young  
44 people with FEP nearing discharge from EPPIC. This list was updated every 3 months during  
45 the recruitment phase. The study coordinator assessed the initial eligibility of young people  
46 within 3 months of discharge in consultation with EPPIC case managers and treating doctors.  
47 Clients deemed potentially eligible were approached by the study coordinator to obtain  
48 written informed consent. Next, eligibility was confirmed through a screening assessment.  
49 Eligible participants completed the baseline assessment and were subsequently randomised to  
50 either HORYZONS plus TAU or TAU alone at a ratio of 1:1. Randomisation was carried out  
51  
52  
53  
54  
55  
56  
57  
58  
59  
60

1  
2  
3 remotely according to the International Conference on Harmonization E9 Statistical  
4 Principles Guidelines[54]. An independent statistician created the randomisation sequence  
5 using permuted blocks. The study coordinator randomised the participants via a secure  
6 online Research Project Management System (RPMS). The RPMS sent an automated email  
7 to the study coordinator and investigators notifying them of the outcome of randomisation.  
8 Finally, the study coordinator informed the participant of the allocation.  
9  
10  
11  
12  
13

14 The study assessors undertaking the follow-up assessments are kept blind to treatment  
15 allocation via the following mechanisms: (1) at the commencement of each research  
16 interview the assessor reminds participants of the importance of the blind, (2) study assessors  
17 are excluded from all clinically related discussions regarding participants, and (3) the  
18 assessors were forbidden from accessing participants' medical records. The assessors record  
19 their best guess of participants' treatment allocation at 6, 12 and 18 months' follow-up in  
20 order to enable an assessment of the success of treatment concealment. In addition, any  
21 instances of unblinding were recorded.  
22  
23  
24  
25  
26  
27  
28

## 29 **Interventions**

### 30 **HORYZONS**

31  
32 HORYZONS has been developed by a multidisciplinary team of researchers, clinical  
33 psychologists, programmers, creative writers, graphic artists and experts in human computer-  
34 interaction[36, 55]. HORYZONS was designed following participatory design principles with  
35 the purpose of addressing social functioning in early psychosis. For example, focus groups  
36 with young people with psychosis revealed that they favoured a social media-based platform  
37 enabling meaningful peer-to-peer contact as well as clinicians' support[35, 56]. In addition,  
38 young people called for online interventions focused on promoting personal strengths and  
39 self-efficacy as opposed to merely ameliorating symptoms and deficits. Finally, young people  
40 indicated that the system should provide self-guided, interactive, tailored interventions,  
41 relevant to their changing needs[35, 56].  
42  
43  
44  
45  
46  
47  
48  
49

50 Informed by young people's continual feedback as well as relevant research in the mental  
51 health and human computer interaction fields[55], the design of HORYZONS merged (1)  
52 interactive online therapy ('Pathways and Steps'), (2) peer-to-peer online social networking  
53 ('the café'), and (3) peer and (4) expert moderation. All components of HORYZONS were  
54  
55  
56  
57  
58  
59  
60

1  
2  
3 designed to reinforce each other, creating a flow for the young person between the social and  
4 therapy elements. For example, young people are encouraged to post comments and interact  
5 with others while engaging with therapy content, and are, at the same time, prompted by  
6 moderators to practice their strengths or use skills they have learned while engaging with the  
7 social network. Young people can log on to Horyzons at any time via an Internet-enabled  
8 desktop or mobile device.  
9  
10  
11  
12

### 13 14 ***Interactive online therapy modules ('pathways and steps')*** 15

16 HORYZONS integrates a number of online 'pathways' organized into distinct themes  
17 including: understanding psychosis, identifying and exercising personal strengths, promoting  
18 positive connections with others, fostering positive emotions, early warning signs and  
19 prevention of relapse, managing stress and anxiety, dealing with depression, and vocational  
20 skills. With the aim of increasing the usability and take-up of therapeutic content, pathways  
21 consist of thematically related interactive therapy 'Steps'. The online 'Steps' are discrete,  
22 interactive, evidence-based therapy modules primarily targeting social functioning in young  
23 people with psychosis; for example, through fostering self-efficacy (e.g., identifying personal  
24 strengths via an interactive card-sort game based on the strengths-based framework [36]),  
25 positive emotions and subjective wellbeing (e.g., practicing mindfulness and self-  
26 compassion), or positive connections with others (e.g., illustrating how to respond  
27 empathically to others). The content of the Steps was informed by previous studies linking  
28 use of personal strengths, increased self-efficacy and positive emotions with improved social  
29 functioning in psychosis[21-22, 25, 57]. Online Steps further address comorbid symptoms  
30 such as anxiety and depression as well as vocational support (informed by our previous  
31 work[58]). Finally, the design of HORYZONS and therapeutic content was strongly  
32 influenced by self-determination theory, an empirically supported theory of motivation which  
33 focuses on the processes and social environments that facilitate or hamper social  
34 functioning[59].  
35  
36  
37  
38  
39  
40  
41  
42  
43  
44  
45  
46  
47

48 The Steps incorporate prompts for participants to share their thoughts and reactions to the  
49 therapeutic material with other users through embedded 'Talking Points'. To ensure that  
50 therapeutic content is translated into behavioural change, the Steps entail behavioural  
51 prompts entitled 'Do its'. For example, following a Step about fostering positive  
52 connections, the participant will find specific behavioural suggestions (or 'do its') to exercise  
53 a therapeutic skill (e.g., empathy) in specific contexts (e.g., school). 'Do its' are also related  
54  
55  
56  
57  
58  
59  
60

1  
2  
3 to the participant's specific strengths (e.g., using kindness in social interactions). A 'Playlist'  
4 stores and schedules any 'Do it' the participant wants to complete in the future. Moreover,  
5 participants can rate, like, comment on, and share any Step or 'Do it' with others via the  
6 social networking newsfeed. Participants can also keep track of 'trending' Steps, which users  
7 have completed specific steps, 'Do its' or pathways, or identify other young people who share  
8 their personal strengths. Finally, young people support each other's efforts to take on specific  
9 behavioral changes via the 'Team up' function (e.g., by supporting or joining others in their  
10 efforts to take on specific challenges).  
11  
12  
13  
14  
15

### 16 *Social network features*

17  
18  
19 Participants are encouraged to communicate with one another and with peer and expert  
20 moderators through the online social network or 'Café' to foster social support. Expert  
21 Moderators (clinicians) are identifiable as a separate user class within the network. Each  
22 participant creates their own profile with images, and can visit the wall of fellow users, where  
23 their posts and general activity are displayed. Posts can include 'icebreakers' (to encourage  
24 social interactions, e.g. What's the worst gift that someone gave you?), user-generated  
25 threads, 'reactions' (designed to facilitate social support, e.g., 'I get you', 'thinking of you')  
26 as well as content related to mental health (e.g., recent steps taken by others) or general  
27 interest.  
28  
29  
30  
31  
32  
33  
34

35 A final feature of HORYZONS is Talk it out (TiO), an online group function informed by  
36 the evidence-based problem-solving framework[60]. A TiO enables users to nominate issues  
37 (e.g., 'how to break through shyness and make new friends?'), which are discussed in  
38 moderated groups through structured phases (e.g., brainstorming, pros and cons, wrap-up).  
39 Previous problems and group solutions are stored in the system providing an easily accessible  
40 'solution wiki' for future young people.  
41  
42  
43  
44  
45

### 46 **Expert and peer moderation**

47  
48 HORYZONS integrates online personal therapist support (by clinicians with experience  
49 treating young people with psychosis). Their role is to customize evidence-based  
50 interventions, monitor participant's clinical status and ensure the safety of the social network.  
51 Each therapist is assigned a caseload (i.e., a 20% full time equivalent online moderator can  
52 comfortably manage 20-25 participants), which they follow for the duration of the trial.  
53 Following the baseline assessment and initial face-to-face orientation to the system, the  
54  
55  
56  
57  
58  
59  
60



1  
2  
3 therapist makes contact with the participant for a brief phone meeting reviewing their  
4 personal needs and preferences[61]. Expert moderators then develop brief case formulations  
5 which are presented during weekly supervision meetings with senior clinical psychologists  
6 from the team. Guided by the individual formulation, moderators send each client tailored  
7 content suggestions weekly (e.g., a Step or 'Do it') with a focus on improving social  
8 functioning. Suggestions appear on the user's home page and they receive a system  
9 notification, which is also delivered via SMS as determined by the participants settings.  
10 Young people can rate the helpfulness of the suggestions, which moderators use to tailor  
11 subsequent recommendations. Expert moderation was informed by the supportive  
12 accountability model[61] a theory-driven framework operationalising how human support  
13 increases user engagement, the self-determination theory[59] and strengths-based models[62]  
14 as a means of enhancing users' engagement and self-efficacy.  
15  
16  
17  
18  
19  
20  
21  
22  
23

24 In addition to clinical moderation, HORYZONS incorporates online vocational support.  
25 Drawing on our previous work[58], the vocational moderator provides individualised online  
26 vocational support, which can include: assessing young people's preferences and training,  
27 identifying suitable competitive job openings, supporting young people in specific job  
28 seeking activities (e.g., writing a CV), or preparing for a job interview.  
29  
30  
31  
32  
33

34 The 'cafe' is led by trained young people with lived experience of mental illness ('Super-  
35 Users'). Super-Users are peer moderators who facilitate social learning using HORYZONS in  
36 desired ways (e.g., self-disclosing, using therapy content to deal with difficulties). Super-  
37 Users also seed discussion threads and 'icebreakers' to enable relevant, enjoyable  
38 conversations and facilitate meaningful relationships. Finally, peer moderation serves to  
39 normalise experiences, counteract stigma and promote engagement. Peer moderation was  
40 informed by the social learning theory which posits that those who observe others (i.e.,  
41 superusers) being rewarded for a particular behaviour (e.g., completing a step or commenting  
42 on the social network) are more likely to modify their beliefs and subsequent behaviour[63].  
43  
44  
45  
46  
47  
48  
49

### 50 **Control intervention**

51 Participants randomised to regular care receive Treatment as Usual (TAU) following  
52 discharge from the EPPIC program. TAU consists of a range of treatment options delivered  
53 by generic medical or mental health services typically available to young people in the  
54  
55  
56  
57  
58  
59  
60



1  
2  
3 absence of enrolment in the study. These can include follow-up by a general practitioner,  
4 private psychiatrist, primary care youth mental health services, or adult mental health services  
5 which deliver multidisciplinary psychiatric care (including medical follow-up, case  
6 management and acute psychiatric care as appropriate). Prior to discharge from specialised  
7 FEP support the EPPIC team, in collaboration with the young person, recommends the best  
8 treatment option based on the complexity of the young person's needs. Those with complex  
9 needs are referred to adult mental health services, while young people who attained a good  
10 level of recovery and remained stable are recommended primary care services. Additionally,  
11 TAU participants are provided with a printed leaflet containing relevant information on  
12 existing e-mental health resources for young people (i.e., Moodgym, e-headspace, Reach-out,  
13 and OYH Client's hub).

### 22 **Safety protocol**

24 The safety protocol is comprised of 3 levels of security including: (1) system and privacy  
25 protection; (2) online safety; and (3) clinical safety[64].

29 HORYZONS is hosted on a University of Melbourne web server. The University has  
30 industry standard measures in place to prevent unauthorized access to the server. The online  
31 system also integrates measures to secure the application and database against unauthorized  
32 access. These measures conform to industry best practice as defined by the Open Web  
33 Application Security Project (OWASP). Privacy and online safety are managed in accordance  
34 with the Australian Communications and Media Authority (ACMA).

40 The study coordinator carries out an initial face-to-face orientation with HORYZONS  
41 participants, including details of the terms of use. Participants were required to accept and  
42 comply with the guidelines for safe use of HORYZONS. When needed, participants are  
43 offered guidance on appropriate usage of the system. All users are asked to nominate an  
44 emergency contact person, such as a close family member. HORYZONS includes a 'report  
45 function' which enables young people to report a concern about any material posted by a  
46 user. The moderator assesses the basis of the report and responds accordingly, which may  
47 include the removal of the material and, in some cases, deactivating or restricting the young  
48 person's account. Participants are also able to hide their profile and activity should they  
49 become concerned about their privacy.

Clinical risk is managed through manual and automated procedures. First, moderators monitor the system twice daily on weekdays and once daily on weekends for evidence of clinical risk or deterioration. Any detected increased risk activates the HORYZONS crisis protocol which includes one or more of the following: a risk assessment with the young person, inform the research team, alert the emergency contact nominated by the participant, and liaise with suitable emergency services where necessary. In addition, the system incorporates visible emergency guidelines and contact information. Finally, HORYZONS includes an automated keyword detection function, which activates each time a participant posts a contribution indicative of clinical risk or that contains potentially offensive words. The function blocks posts with notifications sent to the young person and the moderator, who can ‘unblock’ the post should they determine it to be unproblematic.

### Temporary withdrawal criteria

In the event of a clinically significant deterioration of psychotic symptoms, increased risk or a hospital admission the clinical moderators perform an assessment to determine the risks and benefits of a temporary withdrawal from HORYZONS. Based on this assessment, and in consultation with the young person, the moderator team determines whether the account is temporarily suspended, or level of access restricted. Following suspensions or restrictions to a user’s account, the moderator will contact the young person at monthly intervals to ascertain whether the account is to be reactivated.

### Outcome measures

Primary and secondary outcomes are measured at baseline (prior to randomisation), and at 6, 12 and 18 months follow-up (Table 1). Moreover, social functioning is tracked in real time for a period of 7 days after each assessment using ecological momentary assessment using a purpose-built smartphone application, *SEMA*.

Table 1. Schedule of outcome measures

|                                                         | Baseline | 6mo | 12mo | 18mo |
|---------------------------------------------------------|----------|-----|------|------|
| <b>Primary outcome</b>                                  |          |     |      |      |
| Personal and Social Performance Scale (PSP)             |          |     |      |      |
| <b>Secondary outcomes</b>                               |          |     |      |      |
| First Episode Social Functioning Scale (FESFS)          |          |     |      |      |
| Hospital admissions <sup>a</sup>                        |          |     |      |      |
| Calgary Depression Scale for Schizophrenia (CDSS)       |          |     |      |      |
| Medical Outcomes Study: Social Support Survey (MOS-SSS) |          |     |      |      |
| UCLA Loneliness Scale                                   |          |     |      |      |

|    |                                                                 |  |  |  |
|----|-----------------------------------------------------------------|--|--|--|
| 1  |                                                                 |  |  |  |
| 2  |                                                                 |  |  |  |
| 3  | Self-Esteem Rating Scale-Short Form (SERS-SF)                   |  |  |  |
| 4  | Depression Anxiety and Stress Scale (DASS)                      |  |  |  |
| 5  | Scales of Psychological Wellbeing (SPWB)                        |  |  |  |
| 6  | Satisfaction with Life Scale (SWLS)                             |  |  |  |
| 7  | AQoL 8D questionnaire                                           |  |  |  |
| 8  | The Positive and Negative Syndrome Scale (PANSS)                |  |  |  |
| 9  | Alcohol, Smoking, Substance Involvement Screening Test (ASSIST) |  |  |  |
| 10 | Smartphone Ecological Momentary Assessment (SEMA) <sup>b</sup>  |  |  |  |
| 11 | <b>Subsidiary measures</b>                                      |  |  |  |
| 12 | Resource Use Questionnaire                                      |  |  |  |
| 13 | <b>Exploratory outcomes</b>                                     |  |  |  |
| 14 | Social Interaction Anxiety Scale (SIAS)                         |  |  |  |
| 15 | Social Comparison Scale (SCS)                                   |  |  |  |
| 16 | 2-Way Social Support Scale (2-Way SSS)                          |  |  |  |
| 17 | Savoring Beliefs Inventory (SBI)                                |  |  |  |
| 18 | Mindful Attention Awareness Scale (MAAS)                        |  |  |  |
| 19 | Strengths Use Scale (SUS)                                       |  |  |  |
| 20 | Self-Compassion Scale Short Form (SCS-SF)                       |  |  |  |
| 21 | Physical Activity Questionnaire (IPAQ)                          |  |  |  |
| 22 | Waist circumference                                             |  |  |  |
| 23 | <b>Potential covariates</b>                                     |  |  |  |
| 24 | Duration of Untreated Psychosis (DUP)                           |  |  |  |
| 25 | Scale to Assess Unawareness of Mental Disorder (SUMD)           |  |  |  |
| 26 | Motivational Trait Questionnaire (MTQ)                          |  |  |  |
| 27 | Medication Adherence Rating Scale (MARS)                        |  |  |  |
| 28 | Bell Lysaker Emotion Recognition Task (BLERT)                   |  |  |  |
| 29 | The Hinting Task                                                |  |  |  |
| 30 | Social Probabilistic Inference Task (SPIT)                      |  |  |  |
| 31 | Digit Symbol Substitution Test (DSST)                           |  |  |  |
| 32 | Wechsler Test of Adult Reading (WTAR)                           |  |  |  |
| 33 | <b>Horyzons specific measures</b>                               |  |  |  |
| 34 | Horyzons Perceived Competence Scale (H-PCS)                     |  |  |  |
| 35 | Horyzons Self-regulation Questionnaire (HSRQ)                   |  |  |  |
| 36 | Horyzons Health Care Climate Questionnaire (HCCQ)               |  |  |  |

<sup>a</sup>Continuous from state government databases

<sup>b</sup>Smartphone Ecological Momentary Assessment surveys

### **Primary outcome**

The primary outcome measure is social functioning as measured by the Personal and Social Performance Scale (PSP) at 18 months follow-up. The PSP is a 100-point single-item rating scale derived from Social and Occupational Functioning Assessment Scale (SOFAS) developed specifically to assess social functioning in schizophrenia. The PSP has shown strong psychometric properties[65-66] and has been recommended as one of the best existing tools to assess social functioning in psychosis[67].

Additionally, with the purpose of capturing the full construct of social functioning, the First Episode Social Functioning Scale (FESFS) will be administered at each assessment time point.

1  
2  
3 The FESFS has been developed to measure social functioning in young people with FEP[68].  
4 Based on their psychometric properties and specific focus on social functioning, the  
5 following FESFS subscales were selected: friends and activities ( $\alpha=0.80$ ); independent living  
6 skills ( $\alpha=0.81$ ); interacting with people ( $\alpha=0.80$ ); and intimacy ( $\alpha=0.75$ ). These subscales  
7 have shown to correlate with other measures of social functioning, to be independent of  
8 psychotic symptoms, and to be sensitive to treatment effects[68].  
9  
10  
11  
12  
13

### 14 ***Secondary outcomes***

15  
16 After the study was initiated, some feasibility issues were identified that led to  
17 modifications to the study secondary outcome measures. In the original protocol, we intended  
18 to measure psychotic relapse using the PANSS scale via phone or Skype-based assessments  
19 conducted every two months throughout the 18-month intervention period. Ongoing  
20 measurement of psychotic symptoms at regular intervals is a requirement for the reliable and  
21 prospective identification of psychotic relapse[69]. However, despite our best efforts,  
22 contacting participants via phone calls at regular intervals raised important feasibility issues,  
23 with many participants not answering phone calls or regularly changing phone numbers,  
24 leading to significant missing data. Thus, 12 months after study commencement, it was  
25 decided to discontinue the regular phone calls and prospective assessment of psychotic  
26 relapse. Given the feasibility issues measuring relapse of psychotic symptoms at regular  
27 intervals, the following secondary outcomes were added:  
28  
29  
30  
31  
32  
33  
34  
35  
36

37 1. Hospital admissions due to psychotic symptoms and mental health issues were added as  
38 a secondary outcome variable. We have access to reliable and objective hospital admission  
39 data from research assessments, clinical files as well as state databases (i.e., Centre for  
40 Victorian Data Linkage) spanning the 18-month assessment period. Data on hospital  
41 admission from the state databases will be provided by an independent person blind to study  
42 design and purpose.  
43  
44  
45  
46  
47

48 2. Positive and negative psychotic symptoms as measured by the PANNS scale at each  
49 assessment time-point.  
50  
51  
52

53 3. *Physical health* was also initially included as secondary outcome variable because we  
54 originally intended to incorporate online modules targeting this domain. However, we  
55  
56  
57  
58  
59  
60

1  
2  
3 decided not to include therapy content addressing physical health and therefore this variable  
4 will be analysed as an exploratory outcome.  
5  
6

7  
8 Secondary outcome measures include:

- 9 (1) *accumulated hospital admissions* due to psychotic symptoms and mental health issues  
10 over 18 months;  
11 (2) *vocational status* as measured by employment and/or education status;  
12 (3) *depression* as measured by the Calgary Depression Scale for Schizophrenia  
13 (CDSS[70]);  
14 (4) *social support and loneliness* as assessed by Medical Outcomes Study: Social Support  
15 Survey (MOS-SSS[71]) and the UCLA Loneliness Scale (Version 3[72]);  
16 (5) *self-esteem* and *self-efficacy* as measured by the Self-Esteem Rating Scale-Short Form  
17 (SERS-SF[73]) and Mental Health Confidence Scale (MHCS[74]), respectively;  
18 (6) *anxiety and stress* as determined by the Depression Anxiety and Stress Scale  
19 (DASS[75]);  
20 (7) *psychological wellbeing* as measured by Scales of Psychological Wellbeing  
21 (SPWB[76]);  
22 (8) *satisfaction with life* as measured by Satisfaction with Life Scale (SWLS[77]);  
23 (9) *quality of life* as measured by the AQoL 8D[78]. This questionnaire can also be used to  
24 determine quality-adjusted life years (QALYs), which are useful in economic evaluation  
25 studies;  
26 (10) *positive and negative psychotic symptoms* assessed by means of The Positive and  
27 Negative Syndrome Scale (PANSS[50]);  
28 (11) *substance use* as measured by the Alcohol, Smoking and Substance Involvement  
29 Screening Test (ASSIST version 3.1) over 18 months follow-up;  
30 (12) *Cost-effective analysis*: A Resource Use Questionnaire (RUQ) is used to determine  
31 the broader resource use of participants (e.g. community mental health services,  
32 accommodation, work impacts etc). Additionally, for consenting participants, information  
33 regarding utilisation of health care services available via the Medicare Benefits Schedule  
34 (MBS - medical, allied health, diagnostic and pathology services) and the Pharmaceutical  
35 Benefits Schedule (PBS - medications) will be accessed from the Australian Department  
36 of Human Services;  
37  
38  
39  
40  
41  
42  
43  
44  
45  
46  
47  
48  
49  
50  
51  
52  
53  
54  
55  
56  
57  
58  
59  
60

1  
2  
3 To obtain more dynamic and ecologically valid data on young people's social functioning,  
4 participants utilise a custom-built smartphone app, SEMA, which is readily downloadable at  
5 no charge to participants owning a smartphone (running Android or iOS operating systems).  
6 SEMA delivers surveys (administered for 7 days following each assessment time point)  
7 approximately eight times per day for 7 consecutive days. Young people are prompted to  
8 complete SEMA surveys at random times every 90 min ( $\pm 30$  min) over a 12-h period (e.g. 10  
9 a.m. to 10 p.m.). SEMA tracks participants' responses in (near) real time, ensuring minimal  
10 data loss by uploading responses to a secure server or storing responses on the young  
11 person's smartphone when an Internet connection is temporarily unavailable. Each SEMA  
12 survey begins with four items assessing momentary positive affect ('At the moment, how  
13 happy do you feel?'), negative affect ('At the moment, how sad do you feel?'; 'At the  
14 moment, how stressed do you feel?') and momentary social isolation (e.g. 'At the moment,  
15 how lonely do you feel?') rated on visual slider scales anchored at 0 (not at all) and 100  
16 (very). The order of these four items is randomised at each survey.  
17  
18  
19  
20  
21  
22  
23  
24  
25  
26

27 Following the momentary affect items, the SEMA survey includes items pertaining to  
28 social interactions of the young person (e.g. 'How much time have you spent interacting with  
29 others, since last survey?'), perceived social efficacy (e.g., 'How well do you think you  
30 handled your social interactions, since last survey?'), perceived social support (e.g., 'have  
31 you received support or encouragement from others, since last survey?'), critical comments  
32 (e.g., 'Have you felt that others criticized or judged you, since last survey?'), and social rank  
33 (e.g., 'How competent have you felt in relation to others, since last survey?'), with all  
34 responses being made on visual sliding scales ranging from 0 to 100. The order of these items  
35 is also randomised at each survey.  
36  
37  
38  
39  
40  
41  
42  
43

### 44 ***Exploratory outcomes and potential covariates***

45 Additional exploratory outcomes included: *social anxiety* measured through the Social  
46 Interaction Anxiety Scale (SIAS)[79]; *social comparison and group fit* as assessed through  
47 the Social Comparison Scale (SCS)[80]; *the provision of emotional support* measured via the  
48 2-Way Social Support Scale (2-Way SSS[81]); *anticipatory pleasure* assessed through the  
49 Savoring Beliefs Inventory (SBI[82]); *mindfulness skills* as assessed using the dispositional  
50 Mindful Attention Awareness Scale (MAAS[83]); *strengths use* as assessed by means of the  
51 Strengths Use Scale (SUS[84]); *self-Compassion* as assessed by the Self-Compassion Scale  
52  
53  
54  
55  
56  
57  
58  
59  
60



1  
2  
3 Short Form (SCS-SF[85]); *physical health* as measured by waist circumference over 18  
4 months follow-up; and, *physical activity* as measured by the International Physical Activity  
5 Questionnaire (IPAQ[86]) and by measuring sitting time across different domains[87] (e.g.,  
6 TV, video, computer, working, etc.).  
7  
8  
9

10  
11 Finally, potential covariates included: *Duration of Untreated Psychosis (DUP)* defined as  
12 the time interval between onset of definite positive psychotic symptoms and first engagement  
13 and treatment in an Early Intervention (EI) service; *clinical insight* as assessed by means of  
14 the Scale to Assess Unawareness of Mental Disorder (SUMD[88]); *intrinsic motivation*  
15 measured through the short form of Motivational Trait Questionnaire (MTQ[89]); *medication*  
16 *adherence* measured by the Medication Adherence Rating Scale (MARS[90]); *emotion*  
17 *processing* assessed by means of the Bell Lysaker Emotion Recognition Task (BLERT[91]);  
18 *theory of mind* measured using The Hinting Task[92]; *Jumping to conclusions (JTC)*  
19 measured through the Social Probabilistic Inference Task (SPIT); *premorbid intelligence* as  
20 assessed via Wechsler Test of Adult Reading (WTAR[93]); and *general cognitive deficits*  
21 will be measured through the Digit Symbol Substitution Test (DSST[94]).  
22  
23  
24  
25  
26  
27  
28  
29

### 30 ***HORYZONS specific measures***

31  
32 Usage of HORYZONS is continuously monitored across the study intervention period  
33 (i.e., frequency, duration, and patterns of use). In addition, users complete self-report  
34 measures informed by the self-determination theory including: their perceived competence  
35 using the system, motivations for using it; and their perception of moderation by  
36 HORYZONS.  
37  
38  
39  
40  
41

### 42 **Statistical analysis and sample size**

43  
44 Primary analyses will be undertaken on an intention-to-treat basis. Mixed-model repeated  
45 measures (MMRM) analyses will be used to compare change in social functioning between  
46 the two treatment groups over the 18-month follow-up. MMRM is the analysis of choice  
47 because assumptions of traditional data analysis methods (e.g., ANOVA, logistic regression)  
48 may be violated, such as the assumption of homogeneity of regression across time points[95].  
49 Time (baseline, 6, 12 and 18 months) will be the within-subjects factor and group  
50 (HORYZONS plus TAU vs. TAU) the between-subjects factor. MMRM will also be used to  
51 analyse change in the continuous secondary outcomes over 18 months. Experiencing  
52  
53  
54  
55  
56  
57  
58  
59  
60

1  
2  
3 sampling data will be analysed using a multilevel structural equation modelling (MSEM)  
4 framework[96]. Differential rate of hospital admissions will be analyzed using multilevel  
5 logistic regression. Time to hospital admissions will be assessed by survival analysis (using  
6 either proportional hazard or accelerated life-time models). Additional comparisons between  
7 treatment groups based on completers-only analyses will be conducted. Analyses will be  
8 undertaken in accordance with ICH 9 guidelines including a full analysis as well as per  
9 protocol set. The per protocol sample will be defined based on receiving a pre-specified  
10 minimal exposure to the online intervention (i.e., at least 8 logins over 2 months during the  
11 18-month intervention period).  
12  
13  
14  
15  
16  
17  
18

19 Economic evaluation will comprise a cost-consequences analysis whereby incremental  
20 costs of the intervention will be compared to the full spectrum of study outcomes. A cost  
21 utility analysis will also be undertaken whereby the AQoL 8D will be used to QALYs. The  
22 evaluation will measure and value any change to the use of health care resources over the  
23 period of the study (using the data from the RUQ, MBS/PBS and hospitalisation  
24 administrative data) between the two treatment arms; and then compare any additional costs  
25 to the additional outcomes achieved. Australian sourced unit costs will be attached to the  
26 RUQ (from Australian sources such as the Commonwealth Department of Health, Mental  
27 Health Branch). Standardised economic evaluation techniques including incremental analysis  
28 of mean differences (using statistical techniques such as generalised linear models) and  
29 bootstrapping to determine confidence intervals around incremental cost-effectiveness ratios  
30 will be used. If, as expected, the intervention is found to be effective, lifetime and population  
31 cost-effectiveness of the interventions will be determined using economic modelling  
32 techniques. We will determine the likelihood that the intervention is cost-effective at  
33 commonly used value-for-money thresholds such as \$20,000/QALY and \$50,000/QALY.  
34  
35  
36  
37  
38  
39  
40  
41  
42  
43  
44

45 The primary outcome is change in social functioning at 18 months follow-up. A recent  
46 RCT investigating the effects of extending FEP specialist treatment for 12 months (i.e., a  
47 total of 3 years of specialist treatment) reported an effect size of 0.53 (Cohen's d) for  
48 functional outcomes for the extended model of care at 12-months (i.e., end of the specialised  
49 treatment) compared with TAU (i.e., 2 years of specialist treatment)[32]. If we assume that  
50 alpha is set at 0.05 and power (1- $\beta$ ) at 0.90, then a sample size of 70 is required for each of  
51 the two groups (Total n = 140) to detect medium effect sizes (0.5; Cohen's d). For the second  
52 outcome measure of hospital admissions at 18 months follow-up, there will be 80% power to  
53  
54  
55  
56  
57  
58  
59  
60



1  
2  
3 detect an improvement in the rate of hospital admissions of at least 43% in the  
4 TAU+Horyzons, assuming a hospital admission rate in the TAU of 30% over the 18-month  
5 follow-up[2]. We recruited 170 participants, accommodating for an 18% attrition rate, which  
6 is consistent with a similar study in terms of design and population[32].  
7  
8  
9

### 10 11 **Data management**

12 A custom-built online Research Project Management System (RPMS) is used to manage  
13 the electronic data from this study. The RPMS includes an electronic Case Report Form  
14 (eCRF) and randomisation functionality. The study assessors record participant-level data on  
15 a paper-based Case Report Form (CRF). These data are subsequently entered into the eCRF  
16 section of the RPMS. The randomisation functionality of the RPMS is operated by the study  
17 coordinator. The RPMS is accessed using a secure website and is stored on a secure server. It  
18 is designed to maintain the privacy and confidentiality of participant information and to  
19 ensure the integrity of the data. Access to RPMS is restricted to study personnel and the level  
20 of access is dependent on the person's role. The study assessors and investigators do not have  
21 access to the randomisation section to ensure that they remain blind. Data are stored on three  
22 separate secure computer servers, including data collected from the SEMA tool, the RPMS  
23 and data accumulated from participant activity within the HORYZONS online system. These  
24 various data are aggregated into a single electronic secure databank.  
25  
26  
27  
28  
29  
30  
31  
32  
33  
34

35 Data verification at all assessment time points is being conducted on 20 randomly selected  
36 cases. The selected cases are re-entered by the study coordinator. The a priori acceptable  
37 error rate has been set at 0.5%.  
38  
39  
40

### 41 42 **Ethics and dissemination**

43 Ethics approval for the trial was provided by The Melbourne Health Research and Ethics  
44 Committee (No. 2013.146). All trial participants provided written informed consent prior to  
45 enrolment in the trial. For all eligible participants under 18 years of age, parental or guardian  
46 consent was also obtained.  
47  
48  
49  
50

51 The main results of this clinical trial will be published in a peer-reviewed scientific  
52 journal. Manuscripts will also be prepared for significant findings regarding the secondary  
53 and exploratory aims. These results will be submitted and presented at scientific forums  
54  
55  
56  
57  
58  
59  
60

1  
2  
3 including national and international conferences in schizophrenia, early psychosis and youth  
4 mental health.  
5  
6

## 7 8 **DISCUSSION**

9 The onset of psychosis often strikes young people at the prime of their lives, triggering a  
10 myriad of adverse psychosocial consequences that can result in entrenched social isolation,  
11 unemployment and chronicity[3]. Against this, early intervention is now seen as a key  
12 strategy to improve long-term recovery and reduce treatment costs[3]. However, while  
13 specialist early psychosis services have been demonstrated that they improve outcomes in  
14 FEP, follow-up studies have questioned the maintenance of treatment effects beyond the  
15 intervention period[9- 10]. Moreover, social recovery, a priority for young people, continues  
16 to be resistant to current intervention approaches[19]. This is the first randomised controlled  
17 trial to evaluate a novel online social media intervention designed to address both these  
18 challenges.  
19  
20  
21  
22  
23  
24  
25  
26

27 HORYZONS is the first intervention to exploit online social media technology and apply  
28 strengths and mindfulness approaches to improve long-term social recovery in FEP. In  
29 addition, the design of the intervention builds on our extensive experience developing and  
30 evaluating effective relapse prevention[97-99] and vocational recovery interventions[58] in  
31 early psychosis. Thus, HORYZONS weaves together two novel intervention approaches for  
32 FEP with established evidence-based protocols, while drawing on a strong theoretical base  
33 for social recovery in early psychosis (i.e., self-determination theory[59], broaden and build  
34 theory[22]).  
35  
36  
37  
38  
39  
40  
41

42 Building on a previous successful pilot study[36], HORYZONS was co-developed with  
43 end-users and service providers. The online system was designed to be scalable, embedded  
44 within clinical practice and delivered across early intervention services. Specifically,  
45 HORYZONS is moderated by EPPIC clinicians as part of their routine clinical role (i.e.,  
46 clinicians would allocate a proportion of their clinical time, typically 20 to 30%, to online  
47 moderation). Moderation and training procedures have been manualised and require  
48 minimum specialised training (2 days). Therapist efficiency using HORYZONS is estimated  
49 to be 5 times higher than that of specialised FEP services (100 vs. 20 young people of a  
50 typical caseload in an early psychosis clinic). Thus, if successful, HORYZONS will provide a  
51  
52  
53  
54  
55  
56  
57  
58  
59  
60

1  
2  
3 scalable, cost-effective intervention approach to extend the benefits of early intervention and  
4 improve social functioning in FEP patients.  
5  
6

7  
8 A limitation of the current study is that the control intervention consists of routine care, as  
9 opposed to a sham intervention accounting for increased attention and unspecific therapeutic  
10 factors. That said, this decision was made to enhance the external validity of the findings by  
11 replicating the current mainstream follow-up options available to FEP young people beyond  
12 their involvement in early intervention services. As such, this study is expected to provide  
13 evidence of cost-effectiveness of a step-down model of care instead of generating controlled  
14 evidence on the specific treatment components driving improved outcomes. Of note, the  
15 design of this study parallels that of recently published randomised controlled trials  
16 examining extended interventions for FEP services, with TAU being the control intervention  
17 across all three studies[30-32].  
18  
19  
20  
21  
22  
23

24  
25 Sustained and meaningful recovery is the ultimate goal of early intervention services as  
26 well as the most valued outcome by young people and their families[100]. This is the first  
27 randomised controlled trial to evaluate an online-based intervention as a means to extend the  
28 benefits of specialised early intervention services and foster long-term social functioning in  
29 FEP. Thus, if successful, HORYZONS has the potential to augment the benefits and long-  
30 term impact of the current model of early intervention for psychosis.  
31  
32  
33  
34  
35  
36  
37  
38

### 39 **FUNDING STATEMENT**

40  
41 The HORYZONS trial was supported by the Mental Illness Research Fund (MIRF) from the  
42 State Government of Victoria. M.A-J. was supported by a Career Development Fellowship  
43 (APP1082934) from the National Health and Medical Research Council (NHMRC). S.M.C.  
44 has been supported by a Career Development Fellowship (APP1061998) and Senior Research  
45 Fellowship (APP1136344) from NHMRC. CM was supported by a NHMRC Early Career  
46 Fellowship (APP1035887) during the conduct of the trial. SL was supported in part by a New  
47 Investigator Salary Award from the Canadian Institutes of Health Research and previously in  
48 part by a Research Scholar Salary Award from the Fonds de recherche du Québec—Santé  
49 (FRQS).  
50

### 51 **ACKNOWLEDGMENTS**

52  
53  
54 The authors acknowledge the contribution of the Orygen Youth Advisory Group in the  
55 development of the Horyzons platform. The authors acknowledge the work of the team of  
56  
57  
58  
59

1  
2  
3 clinical moderators and peer workers for their dedication to the project. The authors also  
4 thank the participants for their contribution to making this project possible.  
5

### 6 **AUTHORS' CONTRIBUTIONS**

7 M.A.-J., and J.F.G. led the overall design and conduct of the study. S.B. and S.R. contributed  
8 to the supervision of the moderation of the online intervention. S.D., is the technical lead of  
9 the HORYZONS project and HORYZONS data analyst. C.M., is the lead front-end designer  
10 of the HORYZONS platform. P.R., is the creative content lead of the project. R.L., G.W.,  
11 O.S., T.G., and R.C., contributed to the design of the intervention. M.A.-J wrote the first draft  
12 of the manuscript. D.C., L.V., C.M., H.H., C.G-B., R.D-G., S.M.C., and P.D.M contributed  
13 to the design and conduct of the study. All authors critically revised and approved the final  
14 manuscript.  
15  
16  
17  
18

### 19 **COMPETING INTERESTS STATEMENT**

20 The authors report no relevant conflict of interest.  
21  
22  
23  
24  
25

### 26 **REFERENCES**

- 27  
28 1 Psychiatrists RAaNZCo. The economic cost of serious mental illness  
29 and comorbidities in Australia and New Zealand, 2016.  
30 2 Alvarez-Jimenez M, Priede A, Hetrick SE, et al. Risk factors for  
31 relapse following treatment for first episode psychosis: a systematic  
32 review and meta-analysis of longitudinal studies. *Schizophr Res*  
33 2012;139(1-3):116-28.  
34 3 McGorry PD, Killackey E, Yung A. Early intervention in psychosis:  
35 concepts, evidence and future directions. *World Psychiatry*  
36 2008;7(3):148-56.  
37 4 Alvarez-Jimenez M, Parker AG, Hetrick SE, et al. Preventing the  
38 second episode: a systematic review and meta-analysis of  
39 psychosocial and pharmacological trials in first-episode psychosis.  
40 *Schizophr Bull* 2011;37(3):619-30.  
41 5 Bird V, Premkumar P, Kendall T, et al. Early intervention services,  
42 cognitive-behavioural therapy and family intervention in early  
43 psychosis: systematic review. *Br J Psychiatry* 2010;197:350-6.  
44 6 Petersen L, Jeppesen P, Thorup A, et al. A randomised multicentre  
45 trial of integrated versus standard treatment for patients with a first  
46 episode of psychotic illness. *BMJ* 2005;331(7517):602.  
47  
48  
49  
50  
51  
52  
53  
54  
55  
56  
57  
58  
59  
60

1  
2  
3 7 Craig TK, Garety P, Power P, et al. The Lambeth Early Onset (LEO)  
4 Team: randomised controlled trial of the effectiveness of specialised  
5 care for early psychosis. *BMJ* 2004;329(7474):1067.

6  
7 8 Melle I, Larsen TK, Haahr U, et al. Reducing the duration of  
9 untreated first-episode psychosis: effects on clinical presentation.  
10 *Arch Gen Psychiatry* 2004;61(2):143-50.

11  
12 9 Bertelsen M, Jeppesen P, Petersen L, et al. Five-year follow-up of a  
13 randomized multicenter trial of intensive early intervention vs  
14 standard treatment for patients with a first episode of psychotic  
15 illness: the OPUS trial. *Arch Gen Psychiatry* 2008;65(7):762-71.

16  
17 10 Gafoor R, Nitsch D, McCrone P, et al. Effect of early intervention  
18 on 5-year outcome in non-affective psychosis. *Br J Psychiatry*  
19 2010;196(5):372-6.

20  
21 11 Alvarez-Jimenez M, O'Donoghue B, Thompson A, et al. Beyond  
22 clinical remission in first episode psychosis: thoughts on  
23 antipsychotic maintenance vs. guided discontinuation in the  
24 functional recovery era. *CNS Drugs* 2016;30(5):357-68.

25  
26 12 Horan WP, Subotnik KL, Snyder KS, et al. Do recent-onset  
27 schizophrenia patients experience a "social network crisis"?  
28 *Psychiatry*  
29 2006;69(2):115-29.

30  
31 13 Macdonald E, Hayes R, Baglioni A. The quantity and quality of the  
32 social networks of young people with early psychosis compared with  
33 closely matched controls. *Schizophr Res* 2000;46(1):25-30.

34  
35 14 Morgan C, Kirkbride J, Hutchinson G, et al. Cumulative social  
36 disadvantage, ethnicity and first-episode psychosis: a case-control  
37 study. *Psychol Med* 2008;38(12):1701-15.

38  
39 15 Sündermann O, Onwumere J, Kane F, et al. Social networks and  
40 support in first-episode psychosis: exploring the role of loneliness  
41 and  
42 anxiety. *Soc Psychiatry Psychiatr Epidemiol* 2014;49(3):359-66.

43  
44 16 Norman RM, Malla AK, Manchanda R, et al. Social support and  
45 three-year symptom and admission outcomes for first episode  
46 psychosis. *Schizophr Res* 2005;80(2-3):227-34.

47  
48 17 Norman RM, Windell D, Manchanda R, et al. Social support and  
49  
50  
51  
52  
53  
54  
55  
56  
57  
58  
59  
60

1  
2  
3 functional outcomes in an early intervention program. *Schizophr Res*  
4 2012;140(1-3):37-40.

5  
6 18 Howard L, Leese M, Thornicroft G. Social networks and functional  
7 status in patients with psychosis. *Acta Psychiatrica Scandinavica*  
8 2000;102(5):376-85.

9  
10 19 Fowler D, Hodgekins J, French P, et al. Social recovery therapy in  
11 combination with early intervention services for enhancement of  
12 social recovery in patients with first-episode psychosis  
13 (SUPEREDEN3):  
14 a single-blind, randomised controlled trial. *Lancet Psychiatry*  
15 2018;5(1):41-50.

16  
17 20 Browne J, Estroff SE, Ludwig K, et al. Character strengths of  
18 individuals with first episode psychosis in Individual Resiliency  
19 Training. *Schizophr Res* Published Online First: 21 October 2017.  
20 doi.org/10.1016/j.schres.2017.09.036

21  
22 21 Vaskinn A, Ventura J, Andreassen OA, et al. A social path to  
23 functioning in schizophrenia: from social self-efficacy through  
24 negative symptoms to social functional capacity. *Psychiatry Res*  
25 2015;228(3):803-7.

26  
27 22 Garland EL, Fredrickson B, Kring AM, et al. Upward spirals of  
28 positive emotions counter downward spirals of negativity: Insights  
29 from the broaden-and-build theory and affective neuroscience on  
30 the treatment of emotion dysfunctions and deficits in  
31 psychopathology. *Clin Psychol Rev* 2010;30(7):849-64.

32  
33 23 Garland EL, Geschwind N, Peeters F, et al. Mindfulness training  
34 promotes upward spirals of positive affect and cognition: multilevel  
35 and autoregressive latent trajectory modeling analyses. *Front Psychol*  
36 2015;6:15.

37  
38 24 Roe D, Hasson-Ohayon I, Mashiach-Eizenberg M, et al. Narrative  
39 enhancement and cognitive therapy (NECT) effectiveness: a quasi-  
40 experimental study. *J Clin Psychol* 2014;70(4):303-12.

41  
42 25 Hall PL, Tarrier N. The cognitive-behavioural treatment of low self-  
43 esteem in psychotic patients: a pilot study. *Behav Res Ther*  
44 2003;41(3):317-32.



- 1  
2  
3 26 Linszen D, Dingemans P, Lenior M. Early intervention and a five  
4 year follow up in young adults with a short duration of untreated  
5 psychosis: ethical implications. *Schizophr Res* 2001;51(1):55-61.  
6  
7 27 Norman RM, Manchanda R, Malla AK, et al. Symptom and  
8 functional outcomes for a 5 year early intervention program for  
9 psychoses. *Schizophr Res* 2011;129(2-3):111-5.  
10  
11 28 Crumlish N, Whitty P, Clarke M, et al. Beyond the critical period:  
12 longitudinal study of 8-year outcome in first-episode non-affective  
13 psychosis. *Br J Psychiatry* 2009;194(1):18-24.  
14  
15 29 Alvarez-Jimenez M, Gleeson JF, Henry LP, et al. Road to full  
16 recovery: longitudinal relationship between symptomatic remission  
17 and psychosocial recovery in first-episode psychosis over 7.5 years.  
18 *Psychol Med* 2012;42(3):595-606.  
19  
20 30 Albert N, Melau M, Jensen H, et al. Five years of specialised early  
21 intervention versus two years of specialised early intervention  
22 followed by three years of standard treatment for patients with a  
23 first episode psychosis: randomised, superiority, parallel group trial  
24 in Denmark (OPUS II). *BMJ* 2017;356:i6681.  
25  
26 31 Malla A, Joober R, Iyer S, et al. Comparing three-year extension of  
27 early intervention service to regular care following two years of early  
28 intervention service in first-episode psychosis: a randomized single  
29 blind clinical trial. *World Psychiatry* 2017;16(3):278-86.  
30  
31 32 Chang WC, Kwong VWY, Lau ESK, et al. Sustainability of treatment  
32 effect of a 3-year early intervention programme for first-episode  
33 psychosis. *Br J Psychiatry* 2017;211:37-44.  
34  
35 33 Singh SP. Early intervention in psychosis. *Br J Psychiatry*  
36 2010;196(5):343-5.  
37  
38 34 Alvarez-Jimenez M, Alcazar-Corcoles MA, Gonzalez-Blanch C, et al.  
39 Online, social media and mobile technologies for psychosis  
40 treatment: a systematic review on novel user-led interventions.  
41 *Schizophr Res* 2014;156(1):96-106.  
42  
43 35 Alvarez-Jimenez M, Gleeson J, Bendall S, et al. Internet-based  
44 Interventions for psychosis: a sneak-peek into the future. *Psychiatr*  
45 *Clin North Am* 2012;35(3):735-47.  
46  
47  
48  
49  
50  
51  
52  
53  
54  
55  
56  
57  
58  
59  
60

1  
2  
3 36 Alvarez-Jimenez M, Bendall S, Lederman R, et al. On the  
4 HORYZON: moderated online social therapy for long-term recovery in  
5 first episode psychosis. *Schizophr Res* 2013;143(1):143-9  
6 doi:10.1016/j.schres.2012.10.009.  
7

8  
9 37 Sensis. Sensis Social Media Report 2017 Chapter 1 – Australians  
10 and social media SENSIS, 22 June 2017.  
11

12 38 Duggan M, Ellison N, Lampe C, et al. Social Media Update: Pew  
13 Research Center Report, 2015:1-18.  
14

15 39 Best P, Manktelow R, B T. Online communication, social media  
16 and adolescent wellbeing: A systematic narrative review. *Child Youth*  
17 *Serv Rev* 2014;41:27-36.  
18

19 40 Valenzuela SN, Park BJ, KF Kee. Is there social capital in a social  
20 network site?: Facebook use and college students' life satisfaction,  
21 trust, and participation. *J Comput Mediat Commun* 2009;14(4):875-  
22 901.  
23

24 41 Deters FG, Mehl MR. Does posting facebook status updates  
25 increase or decrease loneliness? An online social networking  
26 experiment. *Soc Psychol Personal Sci* 2013;4(5):579–586.  
27

28 42 Verduyn P, Lee DS, Park J, et al. Passive Facebook usage  
29 undermines affective well-being: Experimental and longitudinal  
30 evidence. *J Exp Psychol Gen* 2015;144(2):480-8.  
31

32 43 Birnbaum ML, Rizvi AF, Correll CU, et al. Role of social media and  
33 the Internet in pathways to care for adolescents and young adults  
34 with psychotic disorders and non-psychotic mood disorders. *Early*  
35 *Interv Psychiatry* 2015.  
36

37 44 Lal S, Dell'Elce J, Malla AK. Technology access and use among  
38 young adults with a first episode of psychosis. *Psychiatr Serv*  
39 2015;66(7):764-5.  
40

41 45 Lal S, Dell'Elce J, Tucci N, et al. Preferences of young adults with  
42 first-episode psychosis for receiving specialized mental health  
43 services using technology: a survey study. *JMIR Ment Health*  
44 2015;2(2):e18.  
45

46 46 Therapeutic Goods Administration. Note for Guidance on Good  
47 Clinical Practice (CPMP/ICH/135/95), Annotated with TGA  
48  
49  
50  
51  
52  
53  
54  
55  
56  
57  
58  
59  
60



- 1  
2  
3 Comments. Canberra: Commonwealth Department of Health and  
4 Aged Care 2000.  
5  
6 47 Eysenbach G. CONSORT-EHEALTH: improving and standardizing  
7 evaluation reports of Web-based and mobile health interventions. *J*  
8 *Med Internet Res* 2011;13(4):e126.  
9  
10 48 Chan AW, Tetzlaff JM, Altman DG, et al. SPIRIT 2013 statement:  
11 defining standard protocol items for clinical trials. *Annals of internal*  
12 *medicine* 2013;158(3):200-7.  
13  
14 49 McGorry PD, Edwards J, Mihalopoulos C, et al. EPPIC: an evolving  
15 system of early detection and optimal management. *Schizophr Bull*  
16 1996;22(2):305-26.  
17  
18 50 Kay SR, Fiszbein A, Opler LA. The positive and negative syndrome  
19 scale (PANSS) for schizophrenia. *Schizophr Bull* 1987;13(2):261-76.  
20  
21 51 Overall JE, Gorham DR. The brief psychiatric rating-scale.  
22 *Psychol Rep* 1962;10(3):799-812.  
23  
24 52 First MB, Spitzer RL, Gibbon M, et al. November 2002. Structured  
25 Clinical Interview for DSM-IV-TR Axis I Disorders. Research Version,  
26 Patient Edition: SCID-I/P) New York. Biometrics Research, New York  
27 State Psychiatric Institute.  
28  
29 53 First MB, Gibbon M, Spitzer RL, et al. User's guide for the  
30 structured clinical interview for DSM-IV axis II personality disorders:  
31 SCID-II: American Psychiatric Pub 1997.  
32  
33 54 Lewis JA. Statistical principles for clinical trials (ICH E9): an  
34 introductory note on an international guideline. *Stat Med*  
35 1999;18(15):1903-42.  
36  
37 55 Lederman R, Wadley G, Gleeson J, et al. Moderated online social  
38 therapy: designing and evaluating technology for mental health.  
39 *ACM Transactions on Computer-Human Interaction (TOCHI)*  
40 2014;21(1):Article No. 5.  
41  
42 56 Alvarez-Jimenez M, Gleeson JF, Rice S, et al. Online peer-to-peer  
43 support in youth mental health: seizing the opportunity. *Epidemiol*  
44 *Psychiatr Sci* 2016;25(2):123-6.  
45  
46 57 Beck AT, Grant PM, Huh GA, et al. Dysfunctional attitudes and  
47 expectancies in deficit syndrome schizophrenia. *Schizophr Bull*  
48 2013;39(1):43-51.  
49  
50  
51  
52  
53  
54  
55  
56  
57  
58  
59  
60

- 1  
2  
3 58 Killackey E, Allott K, Cotton SM, et al. A randomized controlled  
4 trial of vocational intervention for young people with first-episode  
5 psychosis: method. *Early Interv Psychiatry* 2013;7(3):329-37.  
6  
7 59 Ryan RM, Deci EL. Self-determination theory and the facilitation  
8 of intrinsic motivation, social development, and well-being. *Am*  
9 *Psychol* 2000;55(1):68-78.  
10  
11 60 D'zurilla TJ, Goldfried MR. Problem solving and behavior  
12 modification. *J Abnorm Psychol* 1971;78(1):107.  
13  
14 61 Mohr DC, Cuijpers P, Lehman K. Supportive accountability: a  
15 model for providing human support to enhance adherence to  
16 eHealth interventions. *J Med Internet Res* 2011;13(1):e30.  
17  
18 62 Seligman ME, Rashid T, Parks AC. Positive psychotherapy. *Am*  
19 *Psychol* 2006;61(8):774-88.  
20  
21 63 Bandura A. Social cognitive theory: an agentic perspective. *Annu*  
22 *Rev Psychol* 2001;52:1-26.  
23  
24 64 Gleeson JF, Lederman R, Wadley G, et al. Safety and privacy  
25 outcomes from a moderated online social therapy for young people  
26 with first-episode psychosis. *Psychiatr Serv* 2014;65(4):546-50.  
27  
28 65 Nasrallah H, Morosini P, Gagnon DD. Reliability, validity and ability  
29 to detect change of the Personal and Social Performance scale in  
30 patients with stable schizophrenia. *Psychiatry Res* 2008;161(2):213-  
31 24.  
32  
33 66 Gigantesco A, Vittorielli M, Pioli R, et al. The VADO approach in  
34 psychiatric rehabilitation: a randomized controlled trial. *Psychiatr*  
35 *Serv* 2006;57(12):1778-83.  
36  
37 67 Burns T, Patrick D. Social functioning as an outcome measure in  
38 schizophrenia studies. *Acta Psychiatr Scand* 2007;116(6):403-18.  
39  
40 68 Lecomte T, Corbiere M, Ehmann T, et al. Development and  
41 preliminary validation of the First Episode Social Functioning Scale  
42 for early psychosis. *Psychiatry Res* 2014;216(3):412-7.  
43  
44 69 Gleeson JF, Alvarez-Jimenez M, Cotton SM, et al. A systematic  
45 review of relapse measurement in randomized controlled trials of  
46 relapse prevention in first-episode psychosis. *Schizophr Res*  
47 2010;119(1-3):79-88.  
48  
49  
50  
51  
52  
53  
54  
55  
56  
57  
58  
59  
60

1  
2  
3 70 Addington D, Addington J, Matickatyndale E. Assessing depression  
4 in schizophrenia - the Calgary Depression Scale. *Br J Psychiatry Suppl*  
5 1993;163:39-44.

6  
7 71 Sherbourne CD, Stewart AL. The MOS social support survey. *Soc*  
8 *Sci Med* 1991;32(6):705-14.

9  
10 72 Russell DW. UCLA Loneliness Scale (Version 3): reliability, validity,  
11 and factor structure. *J Pers Assess* 1996;66(1):20-40.

12  
13 73 Lecomte T, Corbiere M, Laisne F. Investigating self-esteem in  
14 individuals with schizophrenia: relevance of the Self-Esteem Rating  
15 Scale-Short Form. *Psychiatry Res* 2006;143(1):99-108.

16  
17 74 Castelein S, van der Gaag M, Bruggeman R, et al. Measuring  
18 empowerment among people with psychotic disorders: a comparison  
19 of three instruments. *Psychiatr Serv* 2008;59(11):1338-42.

20  
21 75 Lovibond SH, Lovibond PF. Manual for the Depression Anxiety  
22 Stress Scales. 2nd. ed. Sydney: Psychology Foundation 1995.

23  
24 76 Ryff CD. Happiness is everything, or is it? Explorations on the  
25 meaning of psychological well-being. *J Pers Soc Psychol*  
26 1989;57:1069-81.

27  
28 77 Diener E, Emmons RA, Larsen RJ, et al. The satisfaction with life  
29 scale. *J Pers Assess* 1985;49(1):71-5.

30  
31 78 Richardson J, Elsworth G, Lezzi A, et al. Increasing the sensitivity  
32 of the AQoL inventory for the evaluation of interventions affecting  
33 mental health. Melbourne: Centre for Health Economics, Monash  
34 University 2011.

35  
36 79 Mattick RP, Clarke JC. Development and validation of measures of  
37 social phobia scrutiny fear and social interaction anxiety. *Behav Res*  
38 *Ther* 1998;36(4):455-70.

39  
40 80 Allan S, Gilbert P. A Social-Comparison Scale - Psychometric  
41 Properties and Relationship to Psychopathology. *Pers Individ Dif*  
42 1995;19(3):293-99.

43  
44 81 Shakespeare-Finch J, Obst PL. The development of the 2-Way  
45 Social Support Scale: a measure of giving and receiving emotional  
46 and instrumental support. *J Pers Assess* 2011;93(5):483-90.

1  
2  
3 82 Bryant FB. Savoring Beliefs Inventory (SBI): A scale for measuring  
4 beliefs about savouring. *Journal of Mental Health* 2003;12(2):175–  
5 96.

6  
7 83 Brown KW, Ryan RM. The benefits of being present: mindfulness  
8 and its role in psychological well-being. *J Pers Soc Psychol*  
9 2003;84(4):822-48.

10  
11 84 Wood AM, Linley PA, Maltby J, et al. Using personal and  
12 psychological strengths leads to increases in well-being over time: A  
13 longitudinal study and the development of the strengths use  
14 questionnaire. *Pers Individ Dif* 2010;50(1):15-19.

15  
16 85 Raes F, Pommier E, Neff KD, et al. Construction and factorial  
17 validation of a short form of the Self-Compassion Scale. *Clin Psychol*  
18 *Psychother* 2011;18(3):250-5.

19  
20 86 Craig CL, Marshall AL, Sjostrom M, et al. International physical  
21 activity questionnaire: 12-country reliability and validity. *Med Sci*  
22 *Sports Exerc* 2003;35(8):1381-95.

23  
24 87 Marshall AL, Miller YD, Burton NW, et al. Measuring total and  
25 domain-specific sitting: a study of reliability and validity. *Med Sci*  
26 *Sports Exerc* 2010;42(6):1094-102.

27  
28 88 Amador XF, Strauss DH, Yale SA, et al. Assessment of insight in  
29 psychosis. *Am J Psychiatry* 1993;150(6):873-79.

30  
31 89 Kanfer R, Ackerman PL. Individual differences in work motivation:  
32 Further explorations of a trait framework. *Applied Psychology-an*  
33 *International Review-Psychologie Appliquee-Revue Internationale*  
34 2000;49(3):470-82.

35  
36 90 Thompson K, Kulkarni J, Sergejew AA. Reliability and validity of a  
37 new Medication Adherence Rating Scale (MARS) for the psychoses.  
38 *Schizophr Res* 2000;42(3):241-7.

39  
40 91 Bell M, Bryson G, Lysaker P. Positive and negative affect  
41 recognition in schizophrenia: a comparison with substance abuse and  
42 normal control subjects. *Psychiatry Res* 1997;73(1-2):73-82.

43  
44 92 Corcoran R, Mercer G, Frith CD. Schizophrenia, symptomatology  
45 and social inference: investigating "theory of mind" in people with  
46 schizophrenia. *Schizophr Res* 1995;17(1):5-13  
47  
48  
49  
50  
51  
52  
53  
54  
55  
56  
57  
58  
59  
60

- 1  
2  
3 93 Ginsberg J. Wechsler test of adult reading. *Appl Neuropsychol*  
4 2003(10):182-84.  
5  
6 94 Lezak MD. Neuropsychological assessment: Oxford University  
7 Press, USA 2004.  
8  
9 95 Brown, H & Prescott, R 2015, Applied mixed models in medicine.  
10 Statistics in Practice, 3 edn, John Wiley & Sons Inc., Chichester.  
11  
12 96 Gleeson J, Lederman R, Herrman H, et al. Moderated online social  
13 therapy for carers of young people recovering from first-episode  
14 psychosis: study protocol for a randomised controlled trial. *Trials*  
15 2017;18(1):27.  
16  
17 97 Gleeson JF, Cotton SM, Alvarez-Jimenez M, et al. A randomized  
18 controlled trial of relapse prevention therapy for first-episode  
19 psychosis patients. *J Clin Psychiatry* 2009;70(4):477-86.  
20  
21 98 Gleeson JF, Cotton SM, Alvarez-Jimenez M, et al. A randomized  
22 controlled trial of relapse prevention therapy for first-episode  
23 psychosis patients: outcome at 30-month follow-up. *Schizophr Bull*  
24 2013;39(2):436-48.  
25  
26 99 Alvarez-Jimenez M, Gleeson JF, Cotton S, et al. Predictors of  
27 adherence to cognitive-behavioural therapy in first-episode  
28 psychosis. *Can J Psychiatry* 2009;54(10):710-8.  
29  
30 100 Santesteban-Echarri O, Paino M, Rice S, et al. Predictors of  
31 functional recovery in first-episode psychosis: A systematic review  
32 and meta-analysis of longitudinal studies. *Clinical psychology review*.  
33 *Clin Psychol Rev* 2017;58:59-75.  
34  
35  
36  
37  
38  
39  
40  
41  
42  
43  
44  
45  
46  
47  
48  
49  
50  
51  
52  
53  
54  
55  
56  
57  
58  
59  
60

Figure 1. Study flow diagram for HORYZONS.

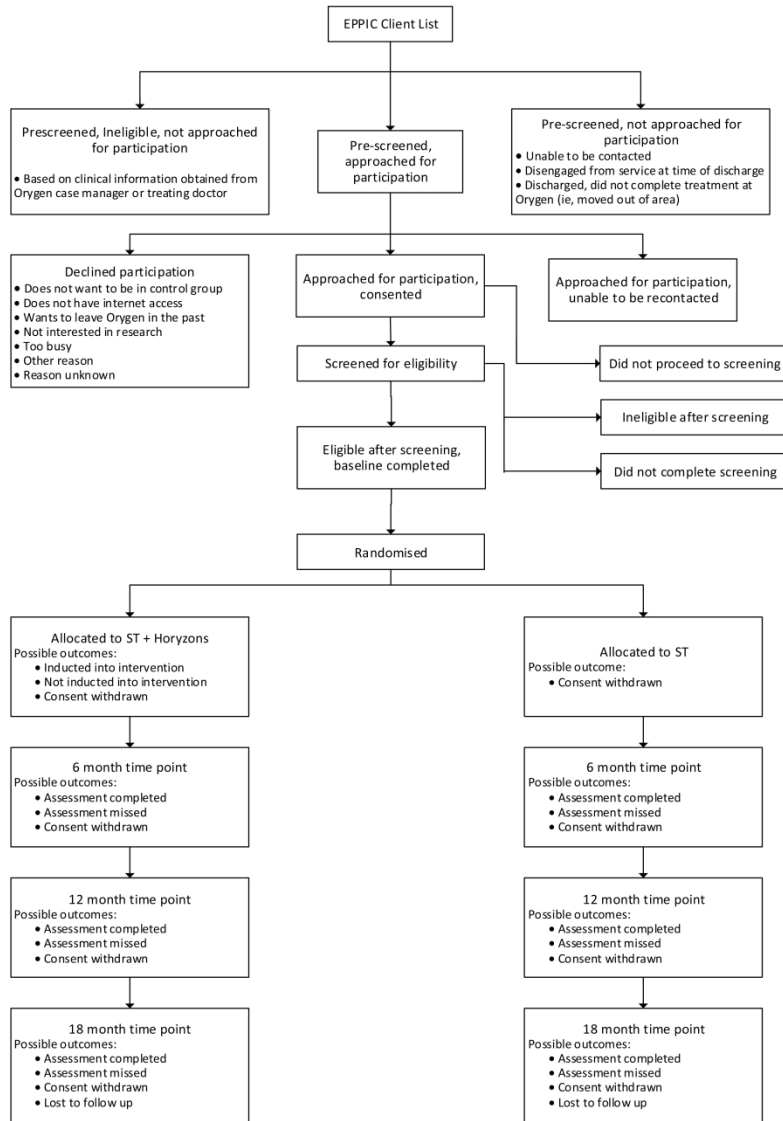

318x473mm (300 x 300 DPI)

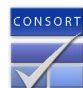

## CONSORT 2010 checklist of information to include when reporting a randomised trial\*

| Section/Topic                    | Item No | Checklist item                                                                                                                                                                              | Reported on page No |
|----------------------------------|---------|---------------------------------------------------------------------------------------------------------------------------------------------------------------------------------------------|---------------------|
| <b>Title and abstract</b>        |         |                                                                                                                                                                                             |                     |
|                                  | 1a      | Identification as a randomised trial in the title                                                                                                                                           | Page 1              |
|                                  | 1b      | Structured summary of trial design, methods, results, and conclusions (for specific guidance see CONSORT for abstracts)                                                                     | Page 2              |
| <b>Introduction</b>              |         |                                                                                                                                                                                             |                     |
| Background and objectives        | 2a      | Scientific background and explanation of rationale                                                                                                                                          | Pages 3-6           |
|                                  | 2b      | Specific objectives or hypotheses                                                                                                                                                           | Pages 6-7           |
| <b>Methods</b>                   |         |                                                                                                                                                                                             |                     |
| Trial design                     | 3a      | Description of trial design (such as parallel, factorial) including allocation ratio                                                                                                        | Pages 7, 9          |
|                                  | 3b      | Important changes to methods after trial commencement (such as eligibility criteria), with reasons                                                                                          | NA                  |
| Participants                     | 4a      | Eligibility criteria for participants                                                                                                                                                       | Page 8              |
|                                  | 4b      | Settings and locations where the data were collected                                                                                                                                        | Page 7              |
| Interventions                    | 5       | The interventions for each group with sufficient details to allow replication, including how and when they were actually administered                                                       | Pages 9-13          |
| Outcomes                         | 6a      | Completely defined pre-specified primary and secondary outcome measures, including how and when they were assessed                                                                          | Pages 15-18         |
|                                  | 6b      | Any changes to trial outcomes after the trial commenced, with reasons                                                                                                                       | Pages 16-17         |
| Sample size                      | 7a      | How sample size was determined                                                                                                                                                              | Page 20             |
|                                  | 7b      | When applicable, explanation of any interim analyses and stopping guidelines                                                                                                                | NA                  |
| <b>Randomisation:</b>            |         |                                                                                                                                                                                             |                     |
| Sequence generation              | 8a      | Method used to generate the random allocation sequence                                                                                                                                      | Page 9              |
|                                  | 8b      | Type of randomisation; details of any restriction (such as blocking and block size)                                                                                                         | Page 9              |
| Allocation concealment mechanism | 9       | Mechanism used to implement the random allocation sequence (such as sequentially numbered containers), describing any steps taken to conceal the sequence until interventions were assigned | Page 9              |
| Implementation                   | 10      | Who generated the random allocation sequence, who enrolled participants, and who assigned participants to interventions                                                                     | Page 9              |
| Blinding                         | 11a     | If done, who was blinded after assignment to interventions (for example, participants, care providers, those assessing outcomes) and how                                                    | Page 9, 21          |



|                                                      |     |                                                                                                                                                   |             |
|------------------------------------------------------|-----|---------------------------------------------------------------------------------------------------------------------------------------------------|-------------|
|                                                      | 11b | If relevant, description of the similarity of interventions                                                                                       | NA          |
| Statistical methods                                  | 12a | Statistical methods used to compare groups for primary and secondary outcomes                                                                     | Pages 19-21 |
|                                                      | 12b | Methods for additional analyses, such as subgroup analyses and adjusted analyses                                                                  | Pages 19-21 |
| <b>Results</b>                                       |     |                                                                                                                                                   |             |
| Participant flow (a diagram is strongly recommended) | 13a | For each group, the numbers of participants who were randomly assigned, received intended treatment, and were analysed for the primary outcome    | NA          |
|                                                      | 13b | For each group, losses and exclusions after randomisation, together with reasons                                                                  | NA          |
| Recruitment                                          | 14a | Dates defining the periods of recruitment and follow-up                                                                                           | NA          |
|                                                      | 14b | Why the trial ended or was stopped                                                                                                                | NA          |
| Baseline data                                        | 15  | A table showing baseline demographic and clinical characteristics for each group                                                                  | NA          |
| Numbers analysed                                     | 16  | For each group, number of participants (denominator) included in each analysis and whether the analysis was by original assigned groups           | NA          |
| Outcomes and estimation                              | 17a | For each primary and secondary outcome, results for each group, and the estimated effect size and its precision (such as 95% confidence interval) | NA          |
|                                                      | 17b | For binary outcomes, presentation of both absolute and relative effect sizes is recommended                                                       | NA          |
| Ancillary analyses                                   | 18  | Results of any other analyses performed, including subgroup analyses and adjusted analyses, distinguishing pre-specified from exploratory         | NA          |
| Harms                                                | 19  | All important harms or unintended effects in each group (for specific guidance see CONSORT for harms)                                             | NA          |
| <b>Discussion</b>                                    |     |                                                                                                                                                   |             |
| Limitations                                          | 20  | Trial limitations, addressing sources of potential bias, imprecision, and, if relevant, multiplicity of analyses                                  | Pages 3, 23 |
| Generalisability                                     | 21  | Generalisability (external validity, applicability) of the trial findings                                                                         | NA          |
| Interpretation                                       | 22  | Interpretation consistent with results, balancing benefits and harms, and considering other relevant evidence                                     | NA          |
| <b>Other information</b>                             |     |                                                                                                                                                   |             |
| Registration                                         | 23  | Registration number and name of trial registry                                                                                                    | Page 2      |
| Protocol                                             | 24  | Where the full trial protocol can be accessed, if available                                                                                       | NA          |
| Funding                                              | 25  | Sources of funding and other support (such as supply of drugs), role of funders                                                                   | Page 23     |

\*We strongly recommend reading this statement in conjunction with the CONSORT 2010 Explanation and Elaboration for important clarifications on all the items. If relevant, we also recommend reading CONSORT extensions for cluster randomised trials, non-inferiority and equivalence trials, non-pharmacological treatments, herbal interventions, and pragmatic trials. Additional extensions are forthcoming: for those and for up to date references relevant to this checklist, see [www.consort-statement.org](http://www.consort-statement.org).



# BMJ Open

## The Horyzons trial: Protocol for a Randomised Controlled Trial of a Moderated Online Social Therapy to Maintain Treatment Effects from First Episode Psychosis Services

|                               |                                                                                                                                                                                                                                                                                                                                                                                                                                                                                                                                                                                                                                                                                                                                                                                                                                                                                                                                                                                                                                                                                                                                                                                                                                                                                                                                                                                                                                                                                                                                                                                                                                                                                                                                                                                                                                                                                                                                                                                                                                                                                                                                                                                                                                                                                                                                 |
|-------------------------------|---------------------------------------------------------------------------------------------------------------------------------------------------------------------------------------------------------------------------------------------------------------------------------------------------------------------------------------------------------------------------------------------------------------------------------------------------------------------------------------------------------------------------------------------------------------------------------------------------------------------------------------------------------------------------------------------------------------------------------------------------------------------------------------------------------------------------------------------------------------------------------------------------------------------------------------------------------------------------------------------------------------------------------------------------------------------------------------------------------------------------------------------------------------------------------------------------------------------------------------------------------------------------------------------------------------------------------------------------------------------------------------------------------------------------------------------------------------------------------------------------------------------------------------------------------------------------------------------------------------------------------------------------------------------------------------------------------------------------------------------------------------------------------------------------------------------------------------------------------------------------------------------------------------------------------------------------------------------------------------------------------------------------------------------------------------------------------------------------------------------------------------------------------------------------------------------------------------------------------------------------------------------------------------------------------------------------------|
| Journal:                      | <i>BMJ Open</i>                                                                                                                                                                                                                                                                                                                                                                                                                                                                                                                                                                                                                                                                                                                                                                                                                                                                                                                                                                                                                                                                                                                                                                                                                                                                                                                                                                                                                                                                                                                                                                                                                                                                                                                                                                                                                                                                                                                                                                                                                                                                                                                                                                                                                                                                                                                 |
| Manuscript ID                 | bmjopen-2018-024104.R1                                                                                                                                                                                                                                                                                                                                                                                                                                                                                                                                                                                                                                                                                                                                                                                                                                                                                                                                                                                                                                                                                                                                                                                                                                                                                                                                                                                                                                                                                                                                                                                                                                                                                                                                                                                                                                                                                                                                                                                                                                                                                                                                                                                                                                                                                                          |
| Article Type:                 | Protocol                                                                                                                                                                                                                                                                                                                                                                                                                                                                                                                                                                                                                                                                                                                                                                                                                                                                                                                                                                                                                                                                                                                                                                                                                                                                                                                                                                                                                                                                                                                                                                                                                                                                                                                                                                                                                                                                                                                                                                                                                                                                                                                                                                                                                                                                                                                        |
| Date Submitted by the Author: | 09-Oct-2018                                                                                                                                                                                                                                                                                                                                                                                                                                                                                                                                                                                                                                                                                                                                                                                                                                                                                                                                                                                                                                                                                                                                                                                                                                                                                                                                                                                                                                                                                                                                                                                                                                                                                                                                                                                                                                                                                                                                                                                                                                                                                                                                                                                                                                                                                                                     |
| Complete List of Authors:     | <p>Alvarez-Jimenez , Mario; Orygen, The National Centre of Excellence in Youth Mental Health; University of Melbourne, Centre for Youth Mental Health</p> <p>Bendall, Sarah; Orygen, The National Centre of Excellence in Youth Mental Health</p> <p>Koval, Peter; University of Melbourne, Melbourne School of Psychological Sciences</p> <p>Rice, Simon; University of Melbourne; Orygen, The National Centre of Excellence in Youth Mental Health</p> <p>Cagliarini, Daniela; Orygen, The National Centre of Excellence in Youth Mental Health; University of Melbourne, Centre for Youth Mental Health</p> <p>Valentine, Lee; Orygen, The National Centre of Excellence in Youth Mental Health; University of Melbourne, Centre for Youth Mental Health</p> <p>D'Alfonso, Simon; Orygen, The National Centre of Excellence in Youth Mental Health; University of Melbourne, School of Computing and Information Systems</p> <p>Miles, Christopher; Orygen, The National Centre of Excellence in Youth Mental Health; University of Melbourne, Centre for Youth Mental Health</p> <p>Russon, Penni; Orygen, The National Centre of Excellence in Youth Mental Health; University of Melbourne, Centre for Youth Mental Health</p> <p>Phillips, Jess; Orygen, The National Centre of Excellence in Youth Mental Health</p> <p>Lederman, Reeva; University of Melbourne, School of Computing and Information Systems</p> <p>Wadley, Greg; University of Melbourne, School of Computing and Information Systems</p> <p>Killackey, Eoin; Orygen, The National Centre of Excellence in Youth Mental Health; University of Melbourne, Centre for Youth Mental Health</p> <p>Santesteban-Echarri, Olga; University of Calgary; Orygen, The National Centre of Excellence in Youth Mental Health</p> <p>Mihalopoulos, Cathrine; Deakin University, Deakin Health Economics, Faculty of Health</p> <p>Herrman, Helen; Orygen, The National Centre of Excellence in Youth Mental Health; University of Melbourne, Centre for Youth Mental Health</p> <p>Gonzalez-Blanch, Cesar; University Hospital Marques de Valdecilla-IDIVAL</p> <p>Gilbertson, Tamsyn; Orygen, The National Centre of Excellence in Youth Mental Health; University of Melbourne, Centre for Youth Mental Health</p> <p>Lal, Shalini; Universite de Montreal,</p> |

|                                 |                                                                                                                                                                                                                                                                                                                                                                                                                                                                                                                                                                                                                   |
|---------------------------------|-------------------------------------------------------------------------------------------------------------------------------------------------------------------------------------------------------------------------------------------------------------------------------------------------------------------------------------------------------------------------------------------------------------------------------------------------------------------------------------------------------------------------------------------------------------------------------------------------------------------|
|                                 | Chambers, Richard; Monash University<br>Daglas, Rothanthi; Orygen, The National Centre of Excellence in Youth Mental Health; University of Melbourne, Centre for Youth Mental Health<br>Latorre, Cristina; University Hospital 'Virgen del Rocio'<br>Cotton, Sue; Orygen, The National Centre of Excellence in Youth Mental Health; University of Melbourne, Centre for Youth Mental Health<br>McGorry, Patrick; Orygen, The National Centre of Excellence in Youth Mental Health; University of Melbourne, Centre for Youth Mental Health<br>Gleeson, John; Australian Catholic University, School of Psychology |
| <b>Primary Subject Heading</b>: | Mental health                                                                                                                                                                                                                                                                                                                                                                                                                                                                                                                                                                                                     |
| Secondary Subject Heading:      | Mental health                                                                                                                                                                                                                                                                                                                                                                                                                                                                                                                                                                                                     |
| Keywords:                       | Schizophrenia & psychotic disorders < PSYCHIATRY, PSYCHIATRY, MENTAL HEALTH                                                                                                                                                                                                                                                                                                                                                                                                                                                                                                                                       |
|                                 |                                                                                                                                                                                                                                                                                                                                                                                                                                                                                                                                                                                                                   |

SCHOLARONE™  
Manuscripts

The Horyzons trial: Protocol for a Randomised Controlled Trial of a Moderated  
Online Social Therapy to Maintain Treatment Effects from First Episode  
Psychosis Services

Alvarez-Jimenez M.,<sup>1,2</sup> Bendall S.,<sup>1,2</sup> Koval P.,<sup>3</sup> Rice S.,<sup>1,2</sup> Cagliarini D.,<sup>1,2</sup> Valentine  
L.,<sup>1,2</sup> D'Alfonso S.,<sup>1,4</sup> Miles C.,<sup>1,2</sup> Russon P.,<sup>1,2</sup> Phillips J.,<sup>1,2</sup> Lederman R.,<sup>4</sup> Wadley  
G.,<sup>4</sup> Killackey E.,<sup>1,2</sup> Santesteban O., Mihalopoulos C.,<sup>6</sup> Herrman H.,<sup>1,2</sup> Gonzalez-  
Blanch C.,<sup>7</sup> Gilbertson T.,<sup>1,2</sup> Lal S.,<sup>8-10</sup> Chambers R.,<sup>11</sup> Daglas-Georgiou R.,<sup>1,2</sup> Latorre  
C.,<sup>12</sup> Cotton SM.,<sup>1,2</sup> McGorry PD.,<sup>1,2</sup> Gleeson JF.<sup>12</sup>

Corresponding author: Mario Alvarez-Jimenez [mario.alvarez@orygen.org.au](mailto:mario.alvarez@orygen.org.au)

**Affiliation:**

- (1) Orygen, The National Centre of Excellence in Youth Mental Health, Melbourne, Australia
- (2) Centre for Youth Mental Health, The University of Melbourne, Australia
- (3) Melbourne School of Psychological Sciences, The University of Melbourne
- (4) School of Computing and Information Systems, The University of Melbourne
- (5) Olga
- (6) Deakin University, School of Health and Social Development, Australia
- (7) University Hospital Marques de Valdecilla-IDIVAL, Santander, Spain
- (8) School of Rehabilitation, Faculty of Medicine, University of Montreal, Montreal, QC, Canada
- (9) University of Montreal Hospital Research Center, Health Innovation and Evaluation Hub, Montreal, QC, Canada
- (10) Douglas Mental Health University Institute, Montreal, QC, Canada
- (11) Monash University, Melbourne, Australia
- (12) University Hospital 'Virgen del Rocío', Seville, Spain
- (13) Australian Catholic University, School of Psychology, Melbourne, Australia

## ABSTRACT

**Introduction:** Specialised early intervention services have demonstrated improved outcomes in first episode psychosis (FEP); however, clinical gains may not be sustained after patients are transferred to regular care. Moreover, many FEP patients remain socially isolated with poor functional outcomes. To address this, our multidisciplinary team has developed a moderated online social media therapy (HORYZONS) designed to enhance social functioning and maintain clinical gains from specialist FEP services. HORYZONS merges: (i) peer-to-peer social networking; (ii) tailored therapeutic interventions; (iii) expert and peer-moderation; and (iv) new models of psychological therapy (strengths and mindfulness-based interventions) targeting social functioning. The aim of this trial is to determine whether, following two years of specialised support, and 18-month online social media-based intervention (HORYZONS) is superior to 18 months of regular care.

**Methods and analysis:** This study is a single-blind randomised controlled trial. The treatment conditions include HORYZONS plus Treatment as Usual (TAU) or TAU alone. We recruited 170 young people with FEP, aged 16-27 years, in clinical remission and nearing discharge from EPPIC, Melbourne. The study includes four assessment time points, namely, baseline, 6, 12 and 18-month follow-up. The study is due for completion in July 2018 and included a 40-month recruitment period and an 18-month treatment phase. The primary outcome is social functioning at 18 months. Secondary outcome measures include rate of hospital admissions, cost-effectiveness, vocational status, depression, social support, loneliness, self-esteem, self-efficacy, anxiety, psychological wellbeing, satisfaction with life, quality of life, positive and negative psychotic symptoms and substance use. Social functioning will be also assessed in real time through our Smartphone Ecological Momentary Assessment (SEMA) tool.

**Ethics and dissemination:** Melbourne Health Human Research Ethics Committee (2013.146) provided ethics approval for this study. Findings will be made available through scientific journals and forums, and to the public via social media and the Orygen website.

**Trial registration:** ANZCTR; ACTRN12614000009617

## STRENGTHS AND LIMITATIONS OF THIS STUDY

- This is the first randomised controlled trial to evaluate the effectiveness of an online intervention designed to extend the benefits of specialised early psychosis services
- HORYZONS is the first intervention to harness online social media technology and use strengths and mindfulness-based interventions to improve long-term recovery in early psychosis
- HORYZONS was developed by a multidisciplinary team in partnership with young people, with the purpose of being scalable across, and embedded within, early intervention services
- In line with recent clinical trials evaluating extended models of care for early psychosis services, the control intervention consists of routine care as opposed to a placebo intervention accounting for increased attention and unspecific therapeutic factors
- Due to the nature of psychosocial interventions, participants and clinicians were not blind to treatment allocation

## INTRODUCTION

Psychosis can be a devastating mental health disorder. Onset is often in adolescence and early adulthood and in many cases follows a chronic and relapsing course that results in great personal suffering and societal costs [1, 2]. Against this daunting picture, early intervention is now seen as the most promising and evidence-based approach to improve the long-term outcomes of psychosis [3]. Specialist First Episode Psychosis (FEP) services originated in the early 1990s with a focus on reducing treatment delays, providing youth friendly, phase-specific support and preventing the development of long-term functional and social disability [3]. Over the past two decades, several randomised controlled trials (RCTs) conducted across countries and mental health systems have demonstrated that these services improve psychotic symptoms, reduce relapse rates, foster patient satisfaction and result in tangible economic benefits [4-8].

There are limits, however, to the impact of early intervention services. First, specialist FEP services typically have treatment resources for 2 years, and recent reports indicate that the benefits of early intervention seen at the end of 2 years may not persist at 3 years post-discharge [9, 10]. Second, even after receiving specialised services, functional recovery lags behind symptomatic remission, and many young people with FEP experience significant social functioning deficits and poor quality of life [11]. Indeed, the onset of psychosis has been characterized as a 'social network crisis' [12], which is not improved by early intervention services. Young people with psychosis have smaller social networks, fewer people to turn to in a crisis [13], are between 5 and 9 times less likely to have confidants compared with their peers [14], and report on average 2-3 lonely days per week [15]. Smaller social networks and lower perceived social support are, in turn, predictive of poorer long-term functional outcomes, shorter time in remission, and increased hospital admissions [16-18]. Taken together, these research findings underscore the need for new treatment approaches that extend the benefits of early intervention services and, ultimately, promote long-term social recovery.

While difficulties with social functioning are commonplace following FEP and can lead to poor long-term outcomes, very few studies have assessed interventions targeting social functioning as a primary outcome. The most researched psychological intervention for FEP

1  
2  
3 has been cognitive behavioural therapy, which is primarily focused on reducing the positive  
4 symptoms of psychosis [19]. Recognizing this gap, a recent trial evaluated a social recovery  
5 therapy in combination with early intervention services to enhance social recovery in FEP  
6 [19]. Study results showed an improvement in structured activity in those receiving the  
7 intervention relative to those receiving early intervention services alone. The renewed focus  
8 on social recovery is also consistent with recent psychological models, which have proposed  
9 self-efficacy [20, 21] and positive emotions [22] as important targets to promote social  
10 functioning in psychosis. Strengths- and mindfulness-based interventions have been put  
11 forward as key interventions to increase self-efficacy and positive emotions [23],  
12 respectively, with preliminary studies supporting their potential to improve social functioning  
13 in psychosis [24, 25].  
14  
15  
16  
17  
18  
19  
20  
21

22 A complementary approach to improving long-term recovery in FEP is to extend the  
23 duration of specialised treatment [26, 27]. This view is underpinned by findings that the first  
24 5 years after psychosis onset constitute a critical period, determining longer term outcomes  
25 [27, 28]. Similarly, promoting sustained social and functional recovery in the early course of  
26 psychosis appears to be a key path towards long-term functional recovery [29]. Two recent  
27 randomised controlled trials have evaluated the effects of the current model of early  
28 intervention (i.e., 2 years of specialised treatment) vs. an extended model of care (i.e., 5 years  
29 of specialised treatment) [30, 31] with mixed results. In one of these trials, the extended  
30 model of care improved length of remission of positive and negative symptoms relative to  
31 regular care [31]. Conversely, a second study showed no significant improvements in clinical  
32 or social outcomes associated with the extended model of care [30]. An additional clinical  
33 trial examined the effects of prolonging the period of specialised care for 12 months (i.e.,  
34 three years vs. two years of specialised treatment) [32]. This study showed significant  
35 improvements in functional outcomes at the end of the 3-year compared with 2-year  
36 specialised support. However, treatment benefits were not sustained, with no significant  
37 differences across treatment groups at 1 and 2 years post specialised intervention [32].  
38  
39  
40  
41  
42  
43  
44  
45  
46  
47  
48  
49

50 An alternative to prolonging the duration of specialised intervention is to offer extended,  
51 lower intensity maintenance treatment following the first two years of specialised treatment  
52 [27]. This is supported by findings that the termination of the specialised intervention and  
53 transfer of care brings about feelings of loss for the patients [9] and significantly derails  
54 engagement with treatment services [33], a pivotal element of early intervention programmes.  
55  
56  
57  
58  
59  
60



1  
2  
3 Thus, a lower intensity level of care may bridge the gap between specialised intervention and  
4 standard treatment and provide a cost-effective alternative to bring about sustained benefits in  
5 FEP. This approach has shown promising results in a single group study, with improvements  
6 seen at 2 years (i.e., end of specialised care) being maintained at 5 years (i.e., after 3 years of  
7 lower intensity specialised treatment) [27].  
8  
9  
10

11  
12 Online- and mobile-based interventions can also provide a lower intensity, cost-effective  
13 and engaging approach to prolonging the benefits of specialised FEP services. Indeed, the  
14 extant research shows that online interventions are feasible, acceptable, and may improve a  
15 range of important domains in psychosis treatment including psychotic symptoms, hospital  
16 admissions, social connectedness, and depression [34, 35]. However, most studies conducted  
17 to date have employed uncontrolled designs, were underpowered, included short follow-up  
18 periods, targeted people with chronic schizophrenia, did not use online social media, and did  
19 not specifically target social functioning [34]. To the best of our knowledge, only one pilot  
20 study has evaluated the acceptability and preliminary benefits of an online intervention in  
21 young people with FEP [36].  
22  
23  
24  
25  
26  
27  
28  
29

30  
31 Finally, online social networks provide a particularly promising avenue to foster social  
32 functioning in young people with FEP. A recent study revealed that 89% of young people  
33 aged 18-29 use social media daily [37], a frequency that is on the rise [38]. Use of online  
34 social media has been associated with increased life satisfaction [39], self-esteem [39], and  
35 social capital [40], as well as lower loneliness and depression [41], particularly for those who  
36 post content to the social network and are active users [42]. Recent surveys indicate that  
37 social media habits of young people with psychosis resemble that of their peers: virtually all  
38 regularly use social media, on average 10 times and 2 hours per day [43, 44]. Particularly  
39 relevant to the therapeutic potential of social media in FEP, 78% would like to obtain help  
40 from clinicians via social media, 40% increase their use of social media when experiencing  
41 symptoms [43] and the majority strongly agree with using social media as a platform from  
42 mental health support [45]. Thus, coupled with psychological interventions specifically  
43 addressing social recovery such as strengths- and mindfulness-based approaches, social  
44 media provides an opportunity deliver acceptable, extended lower intensity support with  
45 potential to foster long term social functioning in FEP.  
46  
47  
48  
49  
50  
51  
52  
53  
54  
55

## 56 **Aims and hypotheses**

57  
58  
59  
60

1  
2  
3 The objective of this trial was to determine whether extending the treatment period of a  
4 specialised FEP service through an 18-month, step-down, novel online social media-based  
5 intervention (HORYZONS) produces better outcomes compared with 2 years of specialist  
6 FEP treatment followed by treatment as usual (TAU), using a randomised controlled single-  
7 blind design. An additional aim of this trial is to determine the cost-effectiveness of  
8 HORYZONS.  
9  
10  
11  
12  
13

14 The primary hypothesis is that, relative to TAU, HORYZONS will lead to improved social  
15 functioning at 18 months amongst young people with FEP. The secondary hypotheses are  
16 that, relative to TAU, HORYZONS will reduce the rate of hospital admissions due to  
17 psychotic symptoms and lead to improvements in depression, vocational outcomes,  
18 satisfaction with life, social support, loneliness, self-esteem, self-efficacy, anxiety, stress,  
19 positive and negative psychotic symptoms, psychological wellbeing, quality of life, and  
20 substance use. Finally, we hypothesise that HORYZONS will be more cost-effective than  
21 TAU.  
22  
23  
24  
25  
26  
27  
28

## 29 **METHODS AND ANALYSIS**

### 30 **Study design**

31  
32 The study design is an 18-month, parallel groups, single-blind, randomised controlled trial  
33 (RCT) in which 170 participants with remitted FEP have been allocated to either the current  
34 mainstream model of early intervention for psychosis (i.e., 2 years of specialised treatment  
35 followed by discharge to treatment as usual; TAU), or TAU in tandem with a moderated  
36 online social media intervention (HORYZONS), for 18 months.  
37  
38  
39  
40  
41

42 The design includes four assessment time points: baseline, 6 months, 12 months and 18  
43 months. The RCT includes a 40-month recruitment period and an 18-month treatment phase,  
44 with the study being completed within 5 years. The protocol development addressed all  
45 aspects of Good Clinical Practice [46], CONSORT EHEALTH criteria [47] and SPIRIT  
46 guidelines [48].  
47  
48  
49  
50  
51

### 52 **Setting**

53 Recruitment of the trial participants commenced in October 2013 and finalised in January  
54 2017 at Early Psychosis Prevention and Intervention Centre (EPPIC), a subprogram of  
55  
56  
57  
58  
59  
60

Orygen Youth Health, Melbourne. EPPIC is a publicly-funded specialist FEP program servicing 250 new referrals for FEP per year. EPPIC provides 18 months to 2 years of specialised care after which patients are discharged and transferred to treatment as usual [49]. Follow-up assessments will be concluded in July 2018.

## Participants

Inclusion criteria for participants were: (a) a first episode of a DSM-IV psychotic disorder or mood disorder with psychotic features; (b) aged 16-27 years inclusive; (c)  $\leq 6$  months treatment with an antipsychotic medication prior to registration with EPPIC; (d) remission of positive symptoms of psychosis, defined, using the Positive and Negative Syndrome Scale (PANSS) [50], as 4 weeks or more of scores of 3 (mild) or below on items P2 (conceptual disorganization) and G9 (unusual thought content), and scores of 4 (moderate) or below with no functional impairment on items P3 (hallucinatory behaviour) and P1 (delusions). Additional inclusion criteria to ensure low level of risk within HORYZONS included: (f) low aggressiveness, defined by a score of 3 or below on the poor impulse control item of the PANNS for the month prior to study entry; and (g) moderate or lower suicidal risk defined as a score of 4 or below on the suicidality subscale of the Brief Psychiatric Rating Scale – expanded version (BPRS) [51] for the month preceding study entry. Finally, participants were required to nominate an emergency contact to be eligible for the study.

Exclusion criteria included: (a) intellectual disability; and (b) inability to converse in or read English. Additional exclusion criteria to ensure safety within the online system included (c) a DSM-IV diagnosis of either antisocial personality disorder (ASPD); or (d) borderline personality disorder (BPD) as well as clinical evidence that the BPD features cause interpersonal difficulties in the treatment environment.

The SCID-I/P [52] was used as the standardized measure of DSM-IV diagnosis of mental illness. The BPD (13 items) and Conduct Disorder/ASPD (22 items) screening questions of the SCID-II Personality Questionnaire were used to assess for BPD and ASPD [53].

Withdrawal from the trial occurred if: (a) participation in the study interfered with appropriate clinical management of risk of harm to self or others (as judged by the treating clinicians and/or senior researchers); (b) serious adverse events developed that could be

1  
2  
3 associated with the online intervention; and (c) participants failed to comply with the terms of  
4 use of the online intervention. Withdrawal from the study could be at the request of the  
5 participant, or at the discretion of the investigator.  
6  
7

## 8 9 **Enrolment and randomisation**

10  
11 The recruitment and allocation procedures are depicted in Figure 1. The study coordinator  
12 liaised with the Orygen Youth Health Quality and Evaluation Unit to obtain a list of young  
13 people with FEP nearing discharge from EPPIC. This list was updated every 3 months during  
14 the recruitment phase. The study coordinator assessed the initial eligibility of young people  
15 within 3 months of discharge in consultation with EPPIC case managers and treating doctors.  
16 Clients deemed potentially eligible were approached by the study coordinator to obtain  
17 written informed consent. Next, eligibility was confirmed through a screening assessment.  
18 Eligible participants completed the baseline assessment and were subsequently randomised to  
19 either HORYZONS plus TAU or TAU alone at a ratio of 1:1. Randomisation was carried out  
20 remotely according to the International Conference on Harmonization E9 Statistical  
21 Principles Guidelines [54]. An independent statistician created the randomisation sequence  
22 using permuted blocks. The study coordinator randomised the participants via a secure  
23 online Research Project Management System (RPMS). The RPMS sent an automated email  
24 to the study coordinator and investigators notifying them of the outcome of randomisation.  
25 Finally, the study coordinator informed the participant of the allocation.  
26  
27  
28  
29  
30  
31  
32  
33  
34  
35  
36

37 The study assessors undertaking the follow-up assessments are kept blind to treatment  
38 allocation via the following mechanisms: (1) at the commencement of each research  
39 interview the assessor reminds participants of the importance of the blind, (2) study assessors  
40 are excluded from all clinically related discussions regarding participants, and (3) the  
41 assessors were forbidden from accessing participants' medical records. The assessors record  
42 their best guess of participants' treatment allocation at 6, 12 and 18 months' follow-up in  
43 order to enable an assessment of the success of treatment concealment. Any instances of  
44 unblinding were recorded.  
45  
46  
47  
48  
49  
50

## 51 **Interventions**

### 52 **HORYZONS**

1  
2  
3 HORYZONS has been developed by a large multidisciplinary team of researchers, clinical  
4 psychologists, programmers, creative writers, graphic artists and experts in human computer-  
5 interaction [36, 55]. HORYZONS was designed following participatory design principles  
6 with the purpose of addressing social functioning in early psychosis. For example, focus  
7 groups with young people with psychosis revealed that they favoured a social media-based  
8 platform enabling meaningful peer-to-peer contact as well as clinicians' support [35, 56]. In  
9 addition, young people called for online interventions focused on promoting personal  
10 strengths and self-efficacy as opposed to merely ameliorating symptoms and deficits. Finally,  
11 young people indicated that the system should provide self-guided, interactive, tailored  
12 interventions, relevant to their changing needs [35, 56].  
13  
14  
15  
16  
17  
18  
19  
20

21 Informed by young people's continual feedback as well as relevant research in the mental  
22 health and human computer interaction fields [55], the design of HORYZONS merged (1)  
23 interactive online therapy ('Pathways and Steps'), (2) peer-to-peer online social networking  
24 ('the café'), and (3) peer and (4) expert moderation. All components of HORYZONS were  
25 designed to reinforce each other, creating a flow for the young person between the social and  
26 therapy elements. For example, young people are encouraged to post comments and interact  
27 with others while engaging with therapy content, and are, at the same time, prompted by  
28 moderators to practice their strengths or use skills they have learned while engaging with the  
29 social network. Young people can log on to Horyzons at any time via an Internet-enabled  
30 desktop or mobile device.  
31  
32  
33  
34  
35  
36  
37  
38

### 39 ***Interactive online therapy modules ('pathways and steps')***

40 HORYZONS integrates a number of online 'pathways' organized into distinct themes  
41 including: understanding psychosis, identifying and exercising personal strengths, promoting  
42 positive connections with others, fostering positive emotions, early warning signs and  
43 prevention of relapse, managing stress and anxiety, dealing with depression, and vocational  
44 skills. With the aim of increasing the usability and take-up of therapeutic content, pathways  
45 consist of thematically related interactive therapy 'Steps'. The online 'Steps' are discrete,  
46 interactive, evidence-based therapy modules primarily targeting social functioning in young  
47 people with psychosis; for example, through fostering self-efficacy (e.g., identifying personal  
48 strengths via an interactive card-sort game based on the strengths-based framework [36]),  
49 positive emotions and subjective wellbeing (e.g., practicing mindfulness and self-  
50 compassion), or positive connections with others (e.g., illustrating how to respond  
51  
52  
53  
54  
55  
56  
57  
58  
59  
60

1  
2  
3 empathically to others). The content of the Steps was informed by previous studies linking  
4 use of personal strengths, increased self-efficacy and positive emotions with improved social  
5 functioning in psychosis [21, 22, 25, 57]. Online Steps further address comorbid symptoms  
6 such as anxiety and depression as well as vocational support (informed by our previous work  
7 [58]). Finally, the design of HORYZONS and therapeutic content was strongly influenced by  
8 self-determination theory, an empirically supported theory of motivation which focuses on  
9 the processes and social environments that facilitate or hamper social functioning [59].  
10  
11  
12  
13  
14  
15

16 The Steps incorporate prompts for participants to share their thoughts and reactions to the  
17 therapeutic material with other users through embedded 'Talking Points'. To ensure that  
18 therapeutic content is translated into behavioural change, the Steps entail behavioural  
19 prompts entitled 'Do its'. For example, following a Step about fostering positive  
20 connections, the participant will find specific behavioural suggestions (or 'do its') to exercise  
21 a therapeutic skill (e.g., empathy) in specific contexts (e.g., school). 'Do its' are also related  
22 to the participant's specific strengths (e.g., using kindness in social interactions). A 'Playlist'  
23 stores and schedules any 'Do it' the participant wants to complete in the future. Moreover,  
24 participants can rate, like, comment on, and share any Step or 'Do it' with others via the  
25 social networking newsfeed. Participants can also keep track of 'trending' Steps, or identify  
26 other young people who share their personal strengths. Finally, young people support each  
27 other's efforts to take on specific behavioral changes via the 'Team up' function (e.g., by  
28 supporting or joining others in their efforts to take on specific challenges).  
29  
30  
31  
32  
33  
34  
35  
36  
37

### 38 *Social network features*

39  
40 Participants are encouraged to communicate with one another and with peer and expert  
41 moderators through the online social network or 'Café' to foster social support. Expert  
42 Moderators (clinicians) are identifiable as a separate user class within the network. Each  
43 participant creates their own profile with images, and can visit the wall of fellow users, where  
44 their posts and general activity are displayed. Posts can include 'icebreakers' (to encourage  
45 social interactions, e.g. What's the worst gift that someone gave you?), user-generated  
46 threads, 'reactions' (designed to facilitate social support, e.g., 'I get you', 'thinking of you')  
47 as well as content related to mental health (e.g., recent steps taken by others) or general  
48 interest.  
49  
50  
51  
52  
53  
54  
55  
56  
57  
58  
59  
60

1  
2  
3 A final feature of HORYZONS is Talk it out (TiO), an online group function informed by  
4 the evidence-based problem-solving framework [60]. A TiO enables users to nominate issues  
5 (e.g., ‘how to break through shyness and make new friends?’), which are discussed in  
6 moderated groups through structured phases (e.g., brainstorming, pros and cons, wrap-up).  
7  
8 Previous problems and group solutions are stored in the system providing an easily accessible  
9 ‘solution wiki’ for future young people.  
10  
11  
12  
13

### 14 **Expert and peer moderation**

15  
16 HORYZONS integrates online personal therapist support (by clinicians with experience  
17 treating young people with psychosis). Their role is to customize evidence-based  
18 interventions, monitor participant’s clinical status and ensure the safety of the social network.  
19 Each therapist is assigned a caseload (i.e., a 20% full time equivalent online moderator can  
20 comfortably manage 20-25 participants), which they follow for the duration of the trial.  
21 Following the baseline assessment and initial face-to-face orientation to the system, the  
22 therapist makes contact with the participant for a brief phone meeting reviewing their  
23 personal needs and preferences [61]. Expert moderators then develop brief case formulations  
24 which are presented during weekly supervision meetings with senior clinical psychologists  
25 from the team. Guided by the individual formulation, moderators send each client tailored  
26 content suggestions weekly (e.g., a Step or ‘Do it’) with a focus on improving social  
27 functioning. Suggestions appear on the user’s home page and they receive a system  
28 notification, which is also delivered via SMS as determined by the participants settings.  
29 Young people can rate the helpfulness of the suggestions, which moderators use to tailor  
30 subsequent recommendations. Expert moderation was informed by the supportive  
31 accountability model [61] a theory-driven framework operationalising how human support  
32 increases user engagement, the self-determination theory [59] and strengths-based models  
33 [62] as a means of enhancing users’ engagement and self-efficacy.  
34  
35  
36  
37  
38  
39  
40  
41  
42  
43  
44  
45

46 In addition to clinical moderation, HORYZONS incorporates online vocational support.  
47 Drawing on our previous work [58], the vocational moderator provides individualised online  
48 vocational support, which can include: assessing young people’s preferences and training,  
49 identifying suitable competitive job openings, supporting young people in specific job  
50 seeking activities (e.g., writing a CV), or preparing for a job interview.  
51  
52  
53  
54  
55  
56  
57  
58  
59  
60



1  
2  
3 The 'cafe' is led by trained young people with lived experience of mental illness ('Peer-  
4 workers'). Peer-workers are peer moderators who facilitate social learning using  
5 HORYZONS in desired ways (e.g., self-disclosing, using therapy content to deal with  
6 difficulties). Peer-workers also seed discussion threads and 'icebreakers' to enable relevant,  
7 enjoyable conversations and facilitate meaningful relationships. Finally, peer moderation  
8 serves to normalise experiences, counteract stigma and promote engagement. Peer  
9 moderation was informed by the social learning theory which posits that those who observe  
10 others (i.e., superusers) being rewarded for a particular behaviour (e.g., completing a step or  
11 commenting on the social network) are more likely to modify their beliefs and subsequent  
12 behaviour [63].  
13  
14  
15  
16  
17  
18  
19  
20

### 21 **Control intervention**

22 Participants randomised to regular care receive Treatment as Usual (TAU) following  
23 discharge from the EPPIC program. TAU consists of a range of treatment options delivered  
24 by generic medical or mental health services typically available to young people in the  
25 absence of enrolment in the study. These can include follow-up by a general practitioner,  
26 private psychiatrist, primary care youth mental health services, or adult mental health services  
27 which deliver multidisciplinary psychiatric care (including medical follow-up, case  
28 management and acute psychiatric care as appropriate). Prior to discharge from specialised  
29 FEP support the EPPIC team, in collaboration with the young person, recommends the best  
30 treatment option based on the complexity of the young person's needs. Those with complex  
31 needs are referred to adult mental health services, while young people who attained a good  
32 level of recovery and remained stable are recommended primary care services. Additionally,  
33 TAU participants are provided with a printed leaflet containing relevant information on  
34 existing e-mental health resources for young people (i.e., Moodgym, e-headspace, Reach-out,  
35 and OYH Client's hub).  
36  
37  
38  
39  
40  
41  
42  
43  
44  
45  
46

### 47 **Safety protocol**

48 The safety protocol is comprised of 3 levels of security including: (1) system and privacy  
49 protection; (2) online safety; and (3) clinical safety [64].  
50  
51  
52

53 HORYZONS is hosted on a University of Melbourne web server. The University has  
54 industry standard measures in place to prevent unauthorized access to the server. The online  
55  
56  
57  
58  
59

1  
2  
3 system also integrates measures to secure the application and database against unauthorized  
4 access. These measures conform to industry best practice as defined by the Open Web  
5 Application Security Project (OWASP). Privacy and online safety are managed in accordance  
6 with the Australian Communications and Media Authority (ACMA).  
7  
8  
9

10  
11 The study coordinator carries out an initial face-to-face orientation with HORYZONS  
12 participants, including details of the terms of use. Participants were required to accept and  
13 comply with the guidelines for safe use of HORYZONS. When needed, participants are  
14 offered guidance on appropriate usage of the system. All users are asked to nominate an  
15 emergency contact person, such as a close family member. HORYZONS includes a 'report  
16 function' which enables young people to report a concern about any material posted by a  
17 user. The moderator assesses the basis of the report and responds accordingly, which may  
18 include the removal of the material and, in some cases, deactivating or restricting the young  
19 person's account. Participants are also able to hide their profile and activity should they  
20 become concerned about their privacy.  
21  
22  
23  
24  
25  
26  
27  
28

29 Clinical risk is managed through manual and automated procedures. First, moderators  
30 monitor the system twice daily on weekdays and once daily on weekends for evidence of  
31 clinical risk or deterioration. Any detected increased risk activates the HORYZONS crisis  
32 protocol which includes one or more of the following: a risk assessment with the young  
33 person, inform the research team, alert the emergency contact nominated by the participant,  
34 and liaise with suitable emergency services where necessary. In addition, the system  
35 incorporates visible emergency guidelines and contact information. Finally, HORYZONS  
36 includes an automated keyword detection function, which activates each time a participant  
37 posts a contribution indicative of clinical risk or that contains potentially offensive words.  
38 The function blocks posts with notifications sent to the young person and the moderator, who  
39 can 'unblock' the post should they determine it to be unproblematic.  
40  
41  
42  
43  
44  
45  
46  
47

#### 48 **Temporary withdrawal criteria**

49  
50 In the event of a clinically significant deterioration of psychotic symptoms, increased risk  
51 or a hospital admission the clinical moderators perform an assessment to determine the risks  
52 and benefits of a temporary withdrawal from HORYZONS. Based on this assessment, and in  
53 consultation with the young person, the moderator team determines whether the account is  
54 temporarily suspended, or level of access restricted. Following suspensions or restrictions to a  
55  
56  
57  
58  
59  
60

user's account, the moderator will contact the young person at monthly intervals to ascertain whether the account is to be reactivated.

## Outcome measures

Primary and secondary outcomes are measured at baseline (prior to randomisation), and at 6, 12 and 18 months follow-up (Table 1). Moreover, social functioning is tracked in real time for a period of 7 days after each assessment using ecological momentary assessment using a purpose-built smartphone application, SEMA (Smartphone Ecological Momentary Assessment).

Table 1. Schedule of outcome measures

|                                                                 | Baseline | 6mo | 12mo | 18mo |
|-----------------------------------------------------------------|----------|-----|------|------|
| <b>Primary outcome</b>                                          |          |     |      |      |
| Personal and Social Performance Scale (PSP)                     |          |     |      |      |
| First Episode Social Functioning Scale (FESFS)                  |          |     |      |      |
| <b>Secondary outcomes</b>                                       |          |     |      |      |
| Hospital admissions <sup>a</sup>                                |          |     |      |      |
| Calgary Depression Scale for Schizophrenia (CDSS)               |          |     |      |      |
| Medical Outcomes Study: Social Support Survey (MOS-SSS)         |          |     |      |      |
| UCLA Loneliness Scale                                           |          |     |      |      |
| Self-Esteem Rating Scale-Short Form (SERS-SF)                   |          |     |      |      |
| Depression Anxiety and Stress Scale (DASS)                      |          |     |      |      |
| Mental Health Confidence Scale (MHCS)                           |          |     |      |      |
| Social Interaction Anxiety Scale (SIAS)                         |          |     |      |      |
| Scales of Psychological Wellbeing (SPWB)                        |          |     |      |      |
| Satisfaction with Life Scale (SWLS)                             |          |     |      |      |
| AQoL 8D questionnaire                                           |          |     |      |      |
| The Positive and Negative Syndrome Scale (PANSS)                |          |     |      |      |
| Employment and Education Status                                 |          |     |      |      |
| Alcohol, Smoking, Substance Involvement Screening Test (ASSIST) |          |     |      |      |
| Smartphone Ecological Momentary Assessment (SEMA) <sup>b</sup>  |          |     |      |      |
| Resource Use Questionnaire                                      |          |     |      |      |
| <b>Exploratory outcomes</b>                                     |          |     |      |      |
| Social Comparison Scale (SCS)                                   |          |     |      |      |
| 2-Way Social Support Scale (2-Way SSS)                          |          |     |      |      |
| Savoring Beliefs Inventory (SBI)                                |          |     |      |      |
| Mindful Attention Awareness Scale (MAAS)                        |          |     |      |      |
| Strengths Use Scale (SUS)                                       |          |     |      |      |
| Self-Compassion Scale Short Form (SCS-SF)                       |          |     |      |      |
| Physical Activity Questionnaire (IPAQ)                          |          |     |      |      |
| Waist circumference                                             |          |     |      |      |
| <b>Potential covariates</b>                                     |          |     |      |      |
| Duration of Untreated Psychosis (DUP)                           |          |     |      |      |
| Scale to Assess Unawareness of Mental Disorder (SUMD)           |          |     |      |      |
| Motivational Trait Questionnaire (MTQ)                          |          |     |      |      |
| Medication Adherence Rating Scale (MARS)                        |          |     |      |      |
| Bell Lysaker Emotion Recognition Task (BLERT)                   |          |     |      |      |
| The Hinting Task                                                |          |     |      |      |
| Social Probabilistic Inference Task (SPIT)                      |          |     |      |      |
| Digit Symbol Substitution Test (DSST)                           |          |     |      |      |
| Wechsler Test of Adult Reading (WTAR)                           |          |     |      |      |

| <b>Horyzons specific measures</b>                 |  |  |  |  |
|---------------------------------------------------|--|--|--|--|
| Horyzons Perceived Competence Scale (H-PCS)       |  |  |  |  |
| Horyzons Self-regulation Questionnaire (HSRQ)     |  |  |  |  |
| Horyzons Health Care Climate Questionnaire (HCCQ) |  |  |  |  |

<sup>a</sup>Continuous from state government databases

<sup>b</sup>Smartphone Ecological Momentary Assessment surveys

### ***Primary outcome***

The primary outcome measure is social functioning as measured by the Personal and Social Performance Scale (PSP) at 18 months follow-up. The PSP is a 100-point single-item rating scale derived from Social and Occupational Functioning Assessment Scale (SOFAS) developed specifically to assess social functioning in schizophrenia. The PSP has shown strong psychometric properties [65, 66] and has been recommended as one of the best existing tools to assess social functioning in psychosis [67].

Additionally, with the purpose of capturing the full construct of social functioning, the First Episode Social Functioning Scale (FESFS) will be administered at each assessment time point.

The FESFS has been developed to measure social functioning in young people with FEP [68]. Based on their psychometric properties and specific focus on social functioning, the following FESFS subscales were selected: friends and activities ( $\alpha=0.80$ ); independent living skills ( $\alpha=0.81$ ); interacting with people ( $\alpha=0.80$ ); and intimacy ( $\alpha=0.75$ ). These subscales have shown to correlate with other measures of social functioning, to be independent of psychotic symptoms, and to be sensitive to treatment effects [68].

### ***Secondary outcomes***

After the study was initiated, some feasibility issues were identified that led to modifications to the study secondary outcome measures. In the original protocol, we intended to measure psychotic relapse using the PANSS scale via phone or Skype-based assessments conducted every two months throughout the 18-month intervention period. Ongoing measurement of psychotic symptoms at regular intervals is a requirement for the reliable and prospective identification of psychotic relapse [69]. However, despite our best efforts, contacting participants via phone calls at regular intervals raised important feasibility issues, with many participants not answering phone calls or regularly changing phone numbers, leading to significant missing data. Thus, 12 months after study commencement, it was decided to discontinue the regular phone calls and prospective assessment of psychotic

1  
2  
3 relapse. Given the feasibility issues measuring relapse of psychotic symptoms at regular  
4 intervals, the following secondary outcomes were added:  
5  
6  
7

8 1. Hospital admissions due to psychotic symptoms and mental health issues were added as  
9 a secondary outcome variable. We have access to reliable and objective hospital admission  
10 data from state databases (i.e., Centre for Victorian Data Linkage) spanning the 18-month  
11 assessment period. Data on hospital admission from the state databases will be provided by  
12 an independent person blind to study design and purpose.  
13  
14  
15

16  
17 2. Positive and negative psychotic symptoms as measured by the PANNS scale at each  
18 assessment time-point.  
19  
20  
21

22 3. *Physical health* was also initially included as secondary outcome variable because we  
23 originally intended to incorporate online modules targeting this domain. However, we  
24 decided not to include therapy content addressing physical health and therefore this variable  
25 will be analysed as an exploratory outcome.  
26  
27  
28  
29

30  
31 Secondary outcome measures include:

32 (1) *accumulated hospital admissions* due to psychotic symptoms and mental health issues  
33 over 18 months;  
34

35 (2) *vocational status* as measured by employment and/or education status;  
36

37 (3) *depression* as measured by the Calgary Depression Scale for Schizophrenia (CDSS  
38 [70]);  
39

40 (4) *social support and loneliness* as assessed by Medical Outcomes Study: Social Support  
41 Survey (MOS-SSS [71]) and the UCLA Loneliness Scale (Version 3 [72]);  
42

43 (5) *self-esteem* and *self-efficacy* as measured by the Self-Esteem Rating Scale-Short Form  
44 (SERS-SF [73]) and Mental Health Confidence Scale (MHCS [74]), respectively;  
45

46 (6) *anxiety and stress* as determined by the Depression Anxiety and Stress Scale (DASS  
47 [75]);  
48

49 (7) *psychological wellbeing* as measured by Scales of Psychological Wellbeing (SPWB  
50 [76]);  
51  
52

53 (8) *satisfaction with life* as measured by Satisfaction with Life Scale (SWLS [77]);  
54  
55  
56  
57  
58  
59  
60

1  
2  
3 (9) *quality of life* as measured by the AQoL 8D [78]. This questionnaire can also be used  
4 to determine quality-adjusted life years (QALYs), which are useful in economic  
5 evaluation studies;

6  
7 (10) *positive and negative psychotic symptoms* assessed by means of The Positive and  
8 Negative Syndrome Scale (PANSS [50]);

9  
10  
11 (11) *substance use* as measured by the Alcohol, Smoking and Substance Involvement  
12 Screening Test (ASSIST version 3.1) over 18 months follow-up;

13  
14 (12) *Cost-effective analysis*: A Resource Use Questionnaire (RUQ) is used to determine  
15 the broader resource use of participants (e.g. community mental health services,  
16 accommodation, work impacts etc). Additionally, for consenting participants, information  
17 regarding utilisation of health care services available via the Medicare Benefits Schedule  
18 (MBS - medical, allied health, diagnostic and pathology services) and the Pharmaceutical  
19 Benefits Schedule (PBS - medications) will be accessed from the Australian Department  
20 of Human Services.  
21  
22  
23  
24  
25  
26

27 To obtain more dynamic and ecologically valid data on young people's social functioning,  
28 participants utilise a custom-built smartphone app, SEMA, which is readily downloadable at  
29 no charge to participants owning a smartphone (running Android or iOS operating systems).  
30 SEMA delivers surveys (administered for 7 days following each assessment time point)  
31 approximately eight times per day for 7 consecutive days. Young people are prompted to  
32 complete SEMA surveys at random times every 90 min ( $\pm 30$  min) over a 12-h period (e.g. 10  
33 a.m. to 10 p.m.). SEMA tracks participants' responses in (near) real time, ensuring minimal  
34 data loss by uploading responses to a secure server or storing responses on the young  
35 person's smartphone when an Internet connection is temporarily unavailable. Each SEMA  
36 survey begins with four items assessing momentary positive affect ('At the moment, how  
37 happy do you feel?', negative affect ('At the moment, how sad do you feel?'; 'At the  
38 moment, how stressed do you feel?') and momentary social isolation (e.g. 'At the moment,  
39 how lonely do you feel?') rated on visual slider scales anchored at 0 (not at all) and 100  
40 (very). The order of these four items is randomised at each survey. Following the momentary  
41 affect items, the SEMA survey includes items pertaining to social interactions of the young  
42 person (e.g. 'How much time have you spent interacting with others, since last survey?'),  
43 perceived social efficacy (e.g., 'How well do you think you handled your social interactions,  
44 since last survey?'), perceived social support (e.g., 'have you received support or  
45 encouragement from others, since last survey?'), critical comments (e.g., 'Have you felt that  
46  
47  
48  
49  
50  
51  
52  
53  
54  
55  
56  
57  
58  
59  
60



others criticized or judged you, since last survey'), and social rank (e.g., How competent have you felt in relation to others, since last survey?'). The order of these items is also randomised at each survey.

### ***Exploratory outcomes and potential covariates***

Additional exploratory outcomes included: *social anxiety* measured through the Social Interaction Anxiety Scale (SIAS) [79]; *social comparison and group fit* as assessed through the Social Comparison Scale (SCS) [80]; *the provision of emotional support* measured via the 2-Way Social Support Scale (2-Way SSS [81]); *anticipatory pleasure* assessed through the Savoring Beliefs Inventory (SBI[82]); *mindfulness skills* as assessed using the dispositional Mindful Attention Awareness Scale (MAAS [83]); *strengths use* as assessed by means of the Strengths Use Scale (SUS[84]); *self-Compassion* as assessed by the Self-Compassion Scale Short Form (SCS-SF[85]); *physical health* as measured by waist circumference over 18 months follow-up; and, *physical activity* as measured by the International Physical Activity Questionnaire (IPAQ [86]) and by measuring sitting time across different domains [87] (e.g., TV, video, computer, working, etc.).

Finally, potential covariates included: *Duration of Untreated Psychosis (DUP)* defined as the time interval between onset of definite positive psychotic symptoms and first engagement and treatment in an Early Intervention (EI) service; *clinical insight* as assessed by means of the Scale to Assess Unawareness of Mental Disorder (SUMD [88]); *intrinsic motivation* measured through the short form of Motivational Trait Questionnaire (MTQ [89]); *medication adherence* measured by the Medication Adherence Rating Scale (MARS [90]); *emotion processing* assessed by means of the Bell Lysaker Emotion Recognition Task (BLERT [91]); *theory of mind* measured using The Hinting Task [92]; *Jumping to conclusions (JTC)* measured through the Social Probabilistic Inference Task (SPIT); *premorbid intelligence* as assessed via Wechsler Test of Adult Reading (WTAR [93]); and *general cognitive deficits* will be measured through the Digit Symbol Substitution Test (DSST [94]).

### ***HORYZONS specific measures***

Usage of HORYZONS is continuously monitored across the study intervention period (i.e., frequency, duration, and patterns of use). In addition, users complete self-report



1  
2  
3 measures informed by the self-determination theory including: their perceived competence  
4 using the system, motivations for using it; and their perception of moderation by  
5 HORYZONS.  
6  
7

### 8 9 **Statistical analysis and sample size**

10  
11 Primary analyses will be undertaken on an intention-to-treat basis. Mixed-model repeated  
12 measures (MMRM) analyses will be used to compare change in social functioning between  
13 the two treatment groups over the 18-month follow-up. MMRM is the analysis of choice  
14 because assumptions of traditional data analysis methods (e.g., ANOVA, regression) may be  
15 violated, such as the assumption of homogeneity of regression across time points [95]. In  
16 addition, MMRM uses all available data (including participants with partial data) to estimate  
17 treatment effects. Time (baseline, 6, 12 and 18 months) will be the within-person predictor  
18 and treatment group (HORYZONS plus TAU vs. TAU) the between-person predictor.  
19 MMRM will also be used to analyse change in the continuous secondary outcomes over 18  
20 months. Additional analyses will use multiple imputation to assess the robustness of the  
21 findings to the choice of method for handling missing data. Ecological momentary  
22 assessment will be analysed using a multilevel structural equation modelling (MSEM)  
23 framework [96]. Differential rate of hospital admissions will be analyzed using multilevel  
24 logistic regression. Time to hospital admissions will be assessed by survival analysis (using  
25 either proportional hazard or accelerated life-time models). Additional comparisons between  
26 treatment groups based on completers-only analyses will be conducted. Analyses will be  
27 undertaken in accordance with ICH 9 guidelines including a full analysis as well as per  
28 protocol set. The per protocol sample will be defined based on receiving a pre-specified  
29 minimal exposure to the online intervention (i.e., more than 16 logins over the 18-month  
30 intervention period).  
31  
32  
33  
34  
35  
36  
37  
38  
39  
40  
41  
42  
43  
44

45 Economic evaluation will comprise a cost-consequences analysis whereby incremental  
46 costs of the intervention will be compared to the full spectrum of study outcomes. A cost  
47 utility analysis will also be undertaken whereby the AQoL 8D will be used to QALYs. The  
48 evaluation will measure and value any change to the use of health care resources over the  
49 period of the study (using the data from the RUQ, MBS/PBS and hospitalisation  
50 administrative data) between the two treatment arms; and then compare any additional costs  
51 to the additional outcomes achieved. Australian sourced unit costs will be attached to the  
52  
53  
54  
55  
56  
57  
58  
59  
60

1  
2  
3 RUQ (from Australian sources such as the Commonwealth Department of Health, Mental  
4 Health Branch). Standardised economic evaluation techniques including incremental analysis  
5 of mean differences (using statistical techniques such as generalised linear models) and  
6 bootstrapping to determine confidence intervals around incremental cost-effectiveness ratios  
7 will be used. If, as expected, the intervention is found to be effective, lifetime and population  
8 cost-effectiveness of the interventions will be determined using economic modelling  
9 techniques. We will determine the likelihood that the intervention is cost-effective at  
10 commonly used value-for-money thresholds such as \$20,000/QALY and \$50,000/QALY.  
11  
12  
13  
14  
15  
16

17 The primary outcome is change in social functioning at 18 months follow-up. A recent  
18 RCT investigating the effects of extending FEP specialist treatment for 12 months (i.e., a  
19 total of 3 years of specialist treatment) reported an effect size of 0.53 (Cohen's d) for  
20 functional outcomes for the extended model of care at 12-months (i.e., end of the specialised  
21 treatment) compared with TAU (i.e., 2 years of specialist treatment) [32]. If we assume that  
22 alpha is set at 0.05 and power (1- $\beta$ ) at 0.90, then a sample size of 70 is required for each of  
23 the two groups (Total n = 140) to detect medium effect sizes (0.5; Cohen's d). For the second  
24 outcome measure of hospital admissions at 18 months follow-up, there will be 80% power to  
25 detect an improvement in the rate of hospital admissions of at least 43% in the  
26 TAU+Horyzons, assuming a hospital admission rate in the TAU of 30% over the 18-month  
27 follow-up [2]. We recruited 170 participants, accommodating for an 18% attrition rate, which  
28 is consistent with a similar study in terms of design and population [32].  
29  
30  
31  
32  
33  
34  
35  
36  
37

### 38 **Data management**

39 A custom-built online Research Project Management System (RPMS) is used to manage  
40 the electronic data from this study. The RPMS includes an electronic Case Report Form  
41 (eCRF) and randomisation functionality. The study assessors record participant-level data on  
42 a paper-based Case Report Form (CRF). These data are subsequently entered into the eCRF  
43 section of the RPMS. The randomisation functionality of the RPMS is operated by the study  
44 coordinator. The RPMS is accessed using a secure website and is stored on a secure server. It  
45 is designed to maintain the privacy and confidentiality of participant information and to  
46 ensure the integrity of the data. Access to RPMS is restricted to study personnel and the level  
47 of access is dependent on the person's role. The study assessors and investigators do not have  
48 access to the randomisation section to ensure that they remain blind. Data are stored on three  
49 separate secure computer servers, including data collected from the SEMA tool, the RPMS  
50  
51  
52  
53  
54  
55  
56  
57  
58  
59

1  
2  
3 and data accumulated from participant activity within the HORYZONS online system. These  
4 various data are aggregated into a single electronic secure databank.  
5  
6

7  
8 Data verification at all assessment time points is being conducted on 20 randomly selected  
9 cases. The selected cases are re-entered by the study coordinator. The a priori acceptable  
10 error rate has been set at 0.5%.  
11  
12

### 13 14 **Ethics and dissemination**

15  
16 Ethics approval for the trial was provided by the Melbourne Health Research and Ethics  
17 Committee (No. 2013.146). All trial participants provided written informed consent prior to  
18 enrolment in the trial. For all eligible participants under 18 years of age, parental or guardian  
19 consent was also obtained.  
20  
21

22  
23 Any adverse events (e.g., hospital admissions) including an independent assessment of  
24 whether the adverse event was related to the online intervention (i.e., made by a psychiatrist)  
25 were reported to the Melbourne Health Research and Ethics Committee. The study was  
26 considered to be low risk by the study sponsor and a trial management group was established  
27 in place of a data monitoring committee.  
28  
29

30  
31 The main results of this clinical trial will be published in a peer-reviewed scientific  
32 journal. Manuscripts will also be prepared for significant findings regarding the secondary  
33 and exploratory aims. These results will be submitted and presented at scientific forums  
34 including national and international conferences in schizophrenia, early psychosis and youth  
35 mental health.  
36  
37  
38  
39  
40  
41

### 42 **Patient and Public Statement**

43  
44 Patients were included in the development of the research questions and outcome  
45 measures in a number of ways. First, Orygen includes a youth reference group which  
46 provides consultation on the design, conduct and ethics of all studies carried out within the  
47 organisation. This group provided input into the main research question, design and outcome  
48 measures of the RCT. In addition, Orygen's internal Research and Review Committee  
49 integrates two youth representatives which also provided feedback on the key methodological  
50 aspects of the study from the consumers perspective.  
51  
52  
53  
54  
55  
56  
57  
58  
59  
60

1  
2  
3 Secondly, the design, development and therapeutic content of the intervention was also  
4 designed in partnership with young people. We conducted a series of focus groups with  
5 young people with lived experience to inform the development of HORYZONS. Young  
6 people participating in these focus groups consistently stated that HORYZONS should focus  
7 on promoting social connectedness and personal strengths [35-36]. This is consistent with  
8 previous qualitative research with young people [97]. The outcome measures were selected  
9 based on the combination of this research and this feedback. However, we did not seek  
10 specific assessment from young people on the burden of assessments or the intervention.  
11 Given that participants can select the frequency with which they use the system and receive  
12 contact from the moderator team, this seemed less salient with respect to the intervention.  
13  
14

15  
16 Patients were not involved in the recruitment into the study. However, peer workers were  
17 involved in the conduct of the online intervention. We established a peer workers reference  
18 group led by our youth participation coordinator. This group provided online peer support via  
19 HORYZONS as well as ongoing consultation on the management of the trial and intervention  
20 updates. In addition, a number of focus groups with participants from the HORYZONS trial  
21 were conducted to obtain feedback on the management (moderation) and content of the  
22 online system.  
23  
24

25  
26 We have created an email list to inform all participants of the results of the study and  
27 provided a contact email for participants to contact the research team should they require any  
28 additional information or wish to participate in online peer support.  
29  
30

## 31 32 33 34 35 36 37 **DISCUSSION**

38  
39 The onset of psychosis often strikes young people at the prime of their lives, triggering a  
40 myriad of adverse psychosocial consequences that can result in entrenched social isolation,  
41 unemployment and chronicity [3]. Against this, early intervention is now seen as a key  
42 strategy to improve long-term recovery and reduce treatment costs [3]. However, while  
43 specialist early psychosis services have been demonstrated that they improve outcomes in  
44 FEP, follow-up studies have questioned the maintenance of treatment effects beyond the  
45 intervention period [9, 10]. Moreover, social recovery, a priority for young people, continues  
46 to be resistant to current intervention approaches [19]. This is the first randomised controlled  
47 trial to evaluate a novel online social media intervention designed to address both these  
48 challenges.  
49  
50  
51  
52  
53  
54  
55  
56  
57  
58  
59  
60

1  
2  
3 HORIZONS is the first intervention to exploit online social media technology and apply  
4 strengths and mindfulness approaches to improve long-term social recovery in FEP. In  
5 addition, the design of the intervention builds on our extensive experience developing and  
6 evaluating effective relapse prevention [98-100] and vocational recovery interventions [58] in  
7 early psychosis. Thus, HORIZONS weaves together two novel intervention approaches for  
8 FEP with established evidence-based protocols, while drawing on a strong theoretical base  
9 for social recovery in early psychosis (i.e., self-determination theory [59], broaden and build  
10 theory [22]).  
11  
12  
13  
14  
15

16  
17 Building on a previous successful pilot study [36], HORIZONS was co-developed with  
18 end-users and service providers. The online system was designed to be scalable, embedded  
19 within clinical practice and delivered across early intervention services. Specifically,  
20 HORIZONS is moderated by EPPIC clinicians as part of their routine clinical role (i.e.,  
21 clinicians would allocate a proportion of their clinical time, typically 20 to 30%, to online  
22 moderation). Moderation and training procedures have been manualised and require  
23 minimum specialised training (2 days). Therapist efficiency using HORIZONS is estimated  
24 to be 5 times higher than that of specialised FEP services (100 vs. 20 young people of a  
25 typical caseload in an early psychosis clinic). Thus, if successful, HORIZONS will provide a  
26 scalable, cost-effective intervention approach to extend the benefits of early intervention and  
27 improve social functioning in FEP patients.  
28  
29  
30  
31  
32  
33  
34  
35

36  
37 A limitation of the current study is that the control intervention consists of routine care, as  
38 opposed to a sham intervention accounting for increased attention and unspecific therapeutic  
39 factors. That said, this decision was made to enhance the external validity of the findings by  
40 replicating the current mainstream follow-up options available to FEP young people beyond  
41 their involvement in early intervention services. As such, this study is expected to provide  
42 evidence of cost-effectiveness of a step-down model of care instead of generating controlled  
43 evidence on the specific treatment components driving improved outcomes. Of note, the  
44 design of this study parallels that of recently published randomised controlled trials  
45 examining extended interventions for FEP services, with TAU being the control intervention  
46 across all three studies [30-32].  
47  
48  
49  
50  
51  
52  
53

54 Sustained and meaningful recovery is the ultimate goal of early intervention services as  
55 well as the most valued outcome by young people and their families [101]. This is the first  
56  
57  
58

1  
2  
3 randomised controlled trial to evaluate an online-based intervention as a means to extend the  
4 benefits of specialised early intervention services and foster long-term social functioning in  
5 FEP. Thus, if successful, HORYZONS has the potential to augment the benefits and long-  
6 term impact of the current model of early intervention for psychosis.  
7  
8  
9

10  
11  
12  
13 Figure 1. Horyzons recruitment and allocation procedure.  
14  
15

## 16 **FUNDING STATEMENT**

17  
18 The HORYZONS trial was supported by the Mental Illness Research Fund (MIRF) from the  
19 State Government of Victoria. M.A.-J. was supported by a Career Development Fellowship  
20 (APP1082934) from the National Health and Medical Research Council (NHMRC). S.M.C.  
21 has been supported by a Career Development Fellowship (APP1061998) and Senior Research  
22 Fellowship (APP1136344) from NHMRC. CMihalopoulos was supported by a NHMRC  
23 Early Career Fellowship (APP1035887) during the conduct of the trial. SL was supported in  
24 part by a New Investigator Salary Award from the Canadian Institutes of Health Research  
25 and previously in part by a Research Scholar Salary Award from the Fonds de recherche du  
26 Québec—Santé (FRQS).  
27  
28  
29  
30

## 31 **SPONSOR CONTACT**

32  
33 [mario.alvarez@orygen.org.au](mailto:mario.alvarez@orygen.org.au)  
34  
35  
36  
37

## 38 **AUTHORS' CONTRIBUTIONS**

39  
40 M.A.-J., and J.F.G. led the overall design and conduct of the study. S.B. and S.R. contributed  
41 to the supervision of the moderation of the online intervention. P.K., is the lead statistics and  
42 ecologically momentary expert in the study. J.P., was the peer workers supervisor during the  
43 study. S.D., is the lead engineer of the HORYZONS project. C.Miles, is the lead front-end  
44 designer of the HORYZONS platform. P.R., is the creative content lead of the project. R.L.,  
45 G.W., O.S., T.G., and C.L. contributed to the design of the intervention. R.C. developed the  
46 mindfulness and self-compassion components of HORYZONS. M.A.-J wrote the first draft of  
47 the manuscript. D.C., L.V., C.Mihalopoulos, H.H., C.G-B., R.D-G., E.K., S.M.C., S.L., and  
48 P.D.M contributed to the design and conduct of the study. All authors critically revised and  
49 approved the final manuscript.  
50  
51  
52  
53

## 54 **ACKNOWLEDGMENTS**

55  
56  
57  
58  
59  
60

1  
2  
3 The authors wish to thank the Orygen Youth Advisory Council and Orygen Youth Research  
4 Council for their input into the development of Horyzons. The authors thank the peer workers  
5 (Damian, Mabigail, Samantha, Kay, Stuart, Amal, Margie, Megan, Gene, Matt, Booma,  
6 Nicole, Rebecca, Elise, Emily, Sarah, Ally, Matt, Joanne, Imesha and Tricia) and online  
7 moderators (Catherine Spillane, Jasmin Watson, Lisa Rumney, Sandra Seif, Jacqui  
8 Mackinnon, Edwina Ford, Gina Chinnery, Dylan Alexander, Rebecca Davenport, Nerida  
9 Barclay, Jennifer Butler, Melanie Cooke and Matthew Stuckey) for their valuable  
10 contributions to the study. The authors also wish to thank the inspiring and generous young  
11 people who took part in the study.  
12  
13  
14  
15  
16

### 17 **COMPETING INTERESTS STATEMENT**

18  
19 The authors report no relevant conflict of interest.  
20  
21

### 22 **REFERENCES**

- 23  
24 1 Psychiatrists RAaNZCo. The economic cost of serious mental illness  
25 and comorbidities in Australia and New Zealand, 2016.  
26  
27 2 Alvarez-Jimenez M, Priede A, Hetrick SE, et al. Risk factors for  
28 relapse following treatment for first episode psychosis: a systematic  
29 review and meta-analysis of longitudinal studies. *Schizophr Res*  
30 2012;139(1-3):116-28.  
31  
32 3 McGorry PD, Killackey E, Yung A. Early intervention in psychosis:  
33 concepts, evidence and future directions. *World Psychiatry*  
34 2008;7(3):148-56.  
35  
36 4 Alvarez-Jimenez M, Parker AG, Hetrick SE, et al. Preventing the  
37 second episode: a systematic review and meta-analysis of  
38 psychosocial and pharmacological trials in first-episode psychosis.  
39 *Schizophr Bull* 2011;37(3):619-30.  
40  
41 5 Bird V, Premkumar P, Kendall T, et al. Early intervention services,  
42 cognitive-behavioural therapy and family intervention in early  
43 psychosis: systematic review. *Br J Psychiatry* 2010;197:350-6.  
44  
45 6 Petersen L, Jeppesen P, Thorup A, et al. A randomised multicentre  
46 trial of integrated versus standard treatment for patients with a first  
47 episode of psychotic illness. *BMJ* 2005;331(7517):602.  
48  
49 7 Craig TK, Garety P, Power P, et al. The Lambeth Early Onset (LEO)  
50 Team: randomised controlled trial of the effectiveness of specialised  
51  
52  
53  
54  
55  
56  
57  
58  
59  
60



1  
2  
3 care for early psychosis. *BMJ* 2004;329(7474):1067.

4 8 Melle I, Larsen TK, Haahr U, et al. Reducing the duration of  
5 untreated first-episode psychosis: effects on clinical presentation.  
6 *Arch Gen Psychiatry* 2004;61(2):143-50.

7  
8  
9 9 Bertelsen M, Jeppesen P, Petersen L, et al. Five-year follow-up of a  
10 randomized multicenter trial of intensive early intervention vs  
11 standard treatment for patients with a first episode of psychotic  
12 illness: the OPUS trial. *Arch Gen Psychiatry* 2008;65(7):762-71.

13  
14 10 Gafoor R, Nitsch D, McCrone P, et al. Effect of early intervention  
15 on 5-year outcome in non-affective psychosis. *Br J Psychiatry*  
16 2010;196(5):372-6.

17  
18  
19 11 Alvarez-Jimenez M, O'Donoghue B, Thompson A, et al. Beyond  
20 clinical remission in first episode psychosis: thoughts on  
21 antipsychotic maintenance vs. guided discontinuation in the  
22 functional recovery era. *CNS Drugs* 2016;30(5):357-68.

23  
24 12 Horan WP, Subotnik KL, Snyder KS, et al. Do recent-onset  
25 schizophrenia patients experience a "social network crisis"?  
26 *Psychiatry*  
27 2006;69(2):115-29.

28  
29  
30 13 Macdonald E, Hayes R, Baglioni A. The quantity and quality of the  
31 social networks of young people with early psychosis compared with  
32 closely matched controls. *Schizophr Res* 2000;46(1):25-30.

33  
34 14 Morgan C, Kirkbride J, Hutchinson G, et al. Cumulative social  
35 disadvantage, ethnicity and first-episode psychosis: a case-control  
36 study. *Psychol Med* 2008;38(12):1701-15.

37  
38 15 Sündermann O, Onwumere J, Kane F, et al. Social networks and  
39 support in first-episode psychosis: exploring the role of loneliness  
40 and  
41 anxiety. *Soc Psychiatry Psychiatr Epidemiol* 2014;49(3):359-66.

42  
43 16 Norman RM, Malla AK, Manchanda R, et al. Social support and  
44 three-year symptom and admission outcomes for first episode  
45 psychosis. *Schizophr Res* 2005;80(2-3):227-34.

46  
47 17 Norman RM, Windell D, Manchanda R, et al. Social support and  
48 functional outcomes in an early intervention program. *Schizophr Res*  
49 2012;140(1-3):37-40.  
50  
51  
52  
53  
54  
55  
56  
57  
58  
59  
60

1  
2  
3 18 Howard L, Leese M, Thornicroft G. Social networks and functional  
4 status in patients with psychosis. *Acta Psychiatrica Scandinavica*  
5 2000;102(5):376-85.

6  
7 19 Fowler D, Hodgekins J, French P, et al. Social recovery therapy in  
8 combination with early intervention services for enhancement of  
9 social recovery in patients with first-episode psychosis  
10 (SUPEREDEN3):  
11 a single-blind, randomised controlled trial. *Lancet Psychiatry*  
12 2018;5(1):41-50.

13  
14 20 Browne J, Estroff SE, Ludwig K, et al. Character strengths of  
15 individuals with first episode psychosis in Individual Resiliency  
16 Training. *Schizophr Res* Published Online First: 21 October 2017.  
17 doi.org/10.1016/j.schres.2017.09.036

18  
19 21 Vaskinn A, Ventura J, Andreassen OA, et al. A social path to  
20 functioning in schizophrenia: from social self-efficacy through  
21 negative symptoms to social functional capacity. *Psychiatry Res*  
22 2015;228(3):803-7.

23  
24 22 Garland EL, Fredrickson B, Kring AM, et al. Upward spirals of  
25 positive emotions counter downward spirals of negativity: Insights  
26 from the broaden-and-build theory and affective neuroscience on  
27 the treatment of emotion dysfunctions and deficits in  
28 psychopathology. *Clin Psychol Rev* 2010;30(7):849-64.

29  
30 23 Garland EL, Geschwind N, Peeters F, et al. Mindfulness training  
31 promotes upward spirals of positive affect and cognition: multilevel  
32 and autoregressive latent trajectory modeling analyses. *Front Psychol*  
33 2015;6:15.

34  
35 24 Roe D, Hasson-Ohayon I, Mashiach-Eizenberg M, et al. Narrative  
36 enhancement and cognitive therapy (NECT) effectiveness: a quasi-  
37 experimental study. *J Clin Psychol* 2014;70(4):303-12.

38  
39 25 Hall PL, Tarrier N. The cognitive-behavioural treatment of low self-  
40 esteem in psychotic patients: a pilot study. *Behav Res Ther*  
41 2003;41(3):317-32.

42  
43 26 Linszen D, Dingemans P, Lenior M. Early intervention and a five  
44 year follow up in young adults with a short duration of untreated  
45 psychosis: ethical implications. *Schizophr Res* 2001;51(1):55-61.

- 1  
2  
3 27 Norman RM, Manchanda R, Malla AK, et al. Symptom and  
4 functional outcomes for a 5 year early intervention program for  
5 psychoses. *Schizophr Res* 2011;129(2-3):111-5.  
6  
7 28 Crumlish N, Whitty P, Clarke M, et al. Beyond the critical period:  
8 longitudinal study of 8-year outcome in first-episode non-affective  
9 psychosis. *Br J Psychiatry* 2009;194(1):18-24.  
10  
11 29 Alvarez-Jimenez M, Gleeson JF, Henry LP, et al. Road to full  
12 recovery: longitudinal relationship between symptomatic remission  
13 and psychosocial recovery in first-episode psychosis over 7.5 years.  
14 *Psychol Med* 2012;42(3):595-606.  
15  
16 30 Albert N, Melau M, Jensen H, et al. Five years of specialised early  
17 intervention versus two years of specialised early intervention  
18 followed by three years of standard treatment for patients with a  
19 first episode psychosis: randomised, superiority, parallel group trial  
20 in Denmark (OPUS II). *BMJ* 2017;356:i6681.  
21  
22 31 Malla A, Joober R, Iyer S, et al. Comparing three-year extension of  
23 early intervention service to regular care following two years of early  
24 intervention service in first-episode psychosis: a randomized single  
25 blind clinical trial. *World Psychiatry* 2017;16(3):278-86.  
26  
27 32 Chang WC, Kwong VWY, Lau ESK, et al. Sustainability of treatment  
28 effect of a 3-year early intervention programme for first-episode  
29 psychosis. *Br J Psychiatry* 2017;211:37-44.  
30  
31 33 Singh SP. Early intervention in psychosis. *Br J Psychiatry*  
32 2010;196(5):343-5.  
33  
34 34 Alvarez-Jimenez M, Alcazar-Corcoles MA, Gonzalez-Blanch C, et al.  
35 Online, social media and mobile technologies for psychosis  
36 treatment: a systematic review on novel user-led interventions.  
37 *Schizophr Res* 2014;156(1):96-106.  
38  
39 35 Alvarez-Jimenez M, Gleeson J, Bendall S, et al. Internet-based  
40 Interventions for psychosis: a sneak-peek into the future. *Psychiatr*  
41 *Clin North Am* 2012;35(3):735-47.  
42  
43 36 Alvarez-Jimenez M, Bendall S, Lederman R, et al. On the  
44 HORYZON: moderated online social therapy for long-term recovery in  
45 first episode psychosis. *Schizophr Res* 2013;143(1):143-9  
46 doi:10.1016/j.schres.2012.10.009.  
47  
48  
49  
50  
51  
52  
53  
54  
55  
56  
57  
58  
59  
60

- 1  
2  
3 37 Sensis. Sensis Social Media Report 2017 Chapter 1 – Australians  
4 and social media SENSIS, 22 June 2017.  
5  
6 38 Duggan M, Ellison N, Lampe C, et al. Social Media Update: Pew  
7 Research Center Report, 2015:1-18.  
8  
9 39 Best P, Manktelow R, B T. Online communication, social media  
10 and adolescent wellbeing: A systematic narrative review. *Child Youth*  
11 *Serv Rev* 2014;41:27-36.  
12  
13 40 Valenzuela SN, Park BJ, KF Kee. Is there social capital in a social  
14 network site?: Facebook use and college students' life satisfaction,  
15 trust, and participation. *J Comput Mediat Commun* 2009;14(4):875-  
16 901.  
17  
18 41 Deters FG, Mehl MR. Does posting facebook status updates  
19 increase or decrease loneliness? An online social networking  
20 experiment. *Soc Psychol Personal Sci* 2013;4(5):579–586.  
21  
22 42 Verduyn P, Lee DS, Park J, et al. Passive Facebook usage  
23 undermines affective well-being: Experimental and longitudinal  
24 evidence. *J Exp Psychol Gen* 2015;144(2):480-8.  
25  
26 43 Birnbaum ML, Rizvi AF, Correll CU, et al. Role of social media and  
27 the Internet in pathways to care for adolescents and young adults  
28 with psychotic disorders and non-psychotic mood disorders. *Early*  
29 *Interv Psychiatry* 2015.  
30  
31 44 Lal S, Dell'Elce J, Malla AK. Technology access and use among  
32 young adults with a first episode of psychosis. *Psychiatr Serv*  
33 2015;66(7):764-5.  
34  
35 45 Lal S, Dell'Elce J, Tucci N, et al. Preferences of young adults with  
36 first-episode psychosis for receiving specialized mental health  
37 services using technology: a survey study. *JMIR Ment Health*  
38 2015;2(2):e18.  
39  
40 46 Therapeutic Goods Administration. Note for Guidance on Good  
41 Clinical Practice (CPMP/ICH/135/95), Annotated with TGA  
42 Comments. Canberra: Commonwealth Department of Health and  
43 Aged Care 2000.  
44  
45 47 Eysenbach G. CONSORT-EHEALTH: improving and standardizing  
46 evaluation reports of Web-based and mobile health interventions. *J*  
47 *Med Internet Res* 2011;13(4):e126.  
48  
49  
50  
51  
52  
53  
54  
55  
56  
57  
58  
59  
60

1  
2  
3 48 Chan AW, Tetzlaff JM, Altman DG, et al. SPIRIT 2013 statement:  
4 defining standard protocol items for clinical trials. *Annals of internal*  
5 *medicine* 2013;158(3):200-7.

6  
7 49 McGorry PD, Edwards J, Mihalopoulos C, et al. EPPIC: an evolving  
8 system of early detection and optimal management. *Schizophr Bull*  
9 1996;22(2):305-26.

10  
11 50 Kay SR, Fiszbein A, Opler LA. The positive and negative syndrome  
12 scale (PANSS) for schizophrenia. *Schizophr Bull* 1987;13(2):261-76.

13  
14 51 Overall JE, Gorham DR. The brief psychiatric rating-scale.  
15 *Psychol Rep* 1962;10(3):799-812.

16  
17 52 First MB, Spitzer RL, Gibbon M, et al. November 2002. Structured  
18 Clinical Interview for DSM-IV-TR Axis I Disorders. Research Version,  
19 Patient Edition: SCID-I/P) New York. Biometrics Research, New York  
20 State Psychiatric Institute.

21  
22 53 First MB, Gibbon M, Spitzer RL, et al. User's guide for the  
23 structured clinical interview for DSM-IV axis II personality disorders:  
24 SCID-II: American Psychiatric Pub 1997.

25  
26 54 Lewis JA. Statistical principles for clinical trials (ICH E9): an  
27 introductory note on an international guideline. *Stat Med*  
28 1999;18(15):1903-42.

29  
30 55 Lederman R, Wadley G, Gleeson J, et al. Moderated online social  
31 therapy: designing and evaluating technology for mental health.  
32 *ACM Transactions on Computer-Human Interaction (TOCHI)*  
33 2014;21(1):Article No. 5.

34  
35 56 Alvarez-Jimenez M, Gleeson JF, Rice S, et al. Online peer-to-peer  
36 support in youth mental health: seizing the opportunity. *Epidemiol*  
37 *Psychiatr Sci* 2016;25(2):123-6.

38  
39 57 Beck AT, Grant PM, Huh GA, et al. Dysfunctional attitudes and  
40 expectancies in deficit syndrome schizophrenia. *Schizophr Bull*  
41 2013;39(1):43-51.

42  
43 58 Killackey E, Allott K, Cotton SM, et al. A randomized controlled  
44 trial of vocational intervention for young people with first-episode  
45 psychosis: method. *Early Interv Psychiatry* 2013;7(3):329-37.

- 1  
2  
3 59 Ryan RM, Deci EL. Self-determination theory and the facilitation  
4 of intrinsic motivation, social development, and well-being. *Am*  
5 *Psychol* 2000;55(1):68-78.  
6  
7 60 D'zurilla TJ, Goldfried MR. Problem solving and behavior  
8 modification. *J Abnorm Psychol* 1971;78(1):107.  
9  
10 61 Mohr DC, Cuijpers P, Lehman K. Supportive accountability: a  
11 model for providing human support to enhance adherence to  
12 eHealth interventions. *J Med Internet Res* 2011;13(1):e30.  
13  
14 62 Seligman ME, Rashid T, Parks AC. Positive psychotherapy. *Am*  
15 *Psychol* 2006;61(8):774-88.  
16  
17 63 Bandura A. Social cognitive theory: an agentic perspective. *Annu*  
18 *Rev Psychol* 2001;52:1-26.  
19  
20 64 Gleeson JF, Lederman R, Wadley G, et al. Safety and privacy  
21 outcomes from a moderated online social therapy for young people  
22 with first-episode psychosis. *Psychiatr Serv* 2014;65(4):546-50.  
23  
24 65 Nasrallah H, Morosini P, Gagnon DD. Reliability, validity and ability  
25 to detect change of the Personal and Social Performance scale in  
26 patients with stable schizophrenia. *Psychiatry Res* 2008;161(2):213-  
27 24.  
28  
29 66 Gigantesco A, Vittorielli M, Pioli R, et al. The VADO approach in  
30 psychiatric rehabilitation: a randomized controlled trial. *Psychiatr*  
31 *Serv* 2006;57(12):1778-83.  
32  
33 67 Burns T, Patrick D. Social functioning as an outcome measure in  
34 schizophrenia studies. *Acta Psychiatr Scand* 2007;116(6):403-18.  
35  
36 68 Lecomte T, Corbiere M, Ehmann T, et al. Development and  
37 preliminary validation of the First Episode Social Functioning Scale  
38 for early psychosis. *Psychiatry Res* 2014;216(3):412-7.  
39  
40 69 Gleeson JF, Alvarez-Jimenez M, Cotton SM, et al. A systematic  
41 review of relapse measurement in randomized controlled trials of  
42 relapse prevention in first-episode psychosis. *Schizophr Res*  
43 2010;119(1-3):79-88.  
44  
45 70 Addington D, Addington J, Matickatyndale E. Assessing depression  
46 in schizophrenia - the Calgary Depression Scale. *Br J Psychiatry Suppl*  
47 1993;163:39-44.  
48  
49  
50  
51  
52  
53  
54  
55  
56  
57  
58  
59  
60



- 1  
2  
3 71 Sherbourne CD, Stewart AL. The MOS social support survey. *Soc*  
4 *Sci Med* 1991;32(6):705-14.  
5  
6 72 Russell DW. UCLA Loneliness Scale (Version 3): reliability, validity,  
7 and factor structure. *J Pers Assess* 1996;66(1):20-40.  
8  
9 73 Lecomte T, Corbiere M, Laisne F. Investigating self-esteem in  
10 individuals with schizophrenia: relevance of the Self-Esteem Rating  
11 Scale-Short Form. *Psychiatry Res* 2006;143(1):99-108.  
12  
13 74 Castelein S, van der Gaag M, Bruggeman R, et al. Measuring  
14 empowerment among people with psychotic disorders: a comparison  
15 of three instruments. *Psychiatr Serv* 2008;59(11):1338-42.  
16  
17 75 Lovibond SH, Lovibond PF. Manual for the Depression Anxiety  
18 Stress Scales. 2nd. ed. Sydney: Psychology Foundation 1995.  
19  
20 76 Ryff CD. Happiness is everything, or is it? Explorations on the  
21 meaning of psychological well-being. *J Pers Soc Psychol*  
22 1989;57:1069-81.  
23  
24 77 Diener E, Emmons RA, Larsen RJ, et al. The satisfaction with life  
25 scale. *J Pers Assess* 1985;49(1):71-5.  
26  
27 78 Richardson J, Elsworth G, Lezzi A, et al. Increasing the sensitivity  
28 of the AQoL inventory for the evaluation of interventions affecting  
29 mental health. Melbourne: Centre for Health Economics, Monash  
30 University 2011.  
31  
32 79 Mattick RP, Clarke JC. Development and validation of measures of  
33 social phobia scrutiny fear and social interaction anxiety. *Behav Res*  
34 *Ther* 1998;36(4):455-70.  
35  
36 80 Allan S, Gilbert P. A Social-Comparison Scale - Psychometric  
37 Properties and Relationship to Psychopathology. *Pers Individ Dif*  
38 1995;19(3):293-99.  
39  
40 81 Shakespeare-Finch J, Obst PL. The development of the 2-Way  
41 Social Support Scale: a measure of giving and receiving emotional  
42 and instrumental support. *J Pers Assess* 2011;93(5):483-90.  
43  
44 82 Bryant FB. Savoring Beliefs Inventory (SBI): A scale for measuring  
45 beliefs about savouring. *Journal of Mental Health* 2003;12(2):175-  
46 96.  
47  
48  
49  
50  
51  
52  
53  
54  
55  
56  
57  
58  
59  
60



1  
2  
3 83 Brown KW, Ryan RM. The benefits of being present: mindfulness  
4 and its role in psychological well-being. *J Pers Soc Psychol*  
5 2003;84(4):822-48.

6  
7 84 Wood AM, Linley PA, Maltby J, et al. Using personal and  
8 psychological strengths leads to increases in well-being over time: A  
9 longitudinal study and the development of the strengths use  
10 questionnaire. *Pers Individ Dif* 2010;50(1):15-19.

11  
12 85 Raes F, Pommier E, Neff KD, et al. Construction and factorial  
13 validation of a short form of the Self-Compassion Scale. *Clin Psychol*  
14 *Psychother* 2011;18(3):250-5.

15  
16 86 Craig CL, Marshall AL, Sjoström M, et al. International physical  
17 activity questionnaire: 12-country reliability and validity. *Med Sci*  
18 *Sports Exerc* 2003;35(8):1381-95.

19  
20 87 Marshall AL, Miller YD, Burton NW, et al. Measuring total and  
21 domain-specific sitting: a study of reliability and validity. *Med Sci*  
22 *Sports Exerc* 2010;42(6):1094-102.

23  
24 88 Amador XF, Strauss DH, Yale SA, et al. Assessment of insight in  
25 psychosis. *Am J Psychiatry* 1993;150(6):873-79.

26  
27 89 Kanfer R, Ackerman PL. Individual differences in work motivation:  
28 Further explorations of a trait framework. *Applied Psychology-an*  
29 *International Review-Psychologie Appliquee-Revue Internationale*  
30 2000;49(3):470-82.

31  
32 90 Thompson K, Kulkarni J, Sergejew AA. Reliability and validity of a  
33 new Medication Adherence Rating Scale (MARS) for the psychoses.  
34 *Schizophr Res* 2000;42(3):241-7.

35  
36 91 Bell M, Bryson G, Lysaker P. Positive and negative affect  
37 recognition in schizophrenia: a comparison with substance abuse and  
38 normal control subjects. *Psychiatry Res* 1997;73(1-2):73-82.

39  
40 92 Corcoran R, Mercer G, Frith CD. Schizophrenia, symptomatology  
41 and social inference: investigating "theory of mind" in people with  
42 schizophrenia. *Schizophr Res* 1995;17(1):5-13

43  
44 93 Ginsberg J. Wechsler test of adult reading. *Appl Neuropsychol*  
45 2003(10):182-84.

46  
47 94 Lezak MD. Neuropsychological assessment: Oxford University  
48 Press, USA 2004.

- 1  
2  
3 95 Brown, H & Prescott, R 2015, Applied mixed models in medicine.  
4 Statistics in Practice, 3 edn, John Wiley & Sons Inc., Chichester.  
5  
6 96 Gleeson J, Lederman R, Herrman H, et al. Moderated online social  
7 therapy for carers of young people recovering from first-episode  
8 psychosis: study protocol for a randomised controlled trial. *Trials*  
9 2017;18(1):27.  
10  
11 97 Iyer SN, Mangala R, Anitha J, et al. An examination of patient-  
12 identified goals for treatment in a first-episode programme in  
13 Chennai, India. *Early Interv Psychiatry* 2011;5(4):360-365.  
14  
15 98 Gleeson JF, Cotton SM, Alvarez-Jimenez M, et al. A randomized  
16 controlled trial of relapse prevention therapy for first-episode  
17 psychosis patients. *J Clin Psychiatry* 2009;70(4):477-86.  
18  
19 99 Gleeson JF, Cotton SM, Alvarez-Jimenez M, et al. A randomized  
20 controlled trial of relapse prevention therapy for first-episode  
21 psychosis patients: outcome at 30-month follow-up. *Schizophr Bull*  
22 2013;39(2):436-48.  
23  
24 100 Alvarez-Jimenez M, Gleeson JF, Cotton S, et al. Predictors of  
25 adherence to cognitive-behavioural therapy in first-episode  
26 psychosis. *Can J Psychiatry* 2009;54(10):710-8.  
27  
28 101 Santesteban-Echarri O, Paino M, Rice S, et al. Predictors of  
29 functional recovery in first-episode psychosis: A systematic review  
30 and meta-analysis of longitudinal studies. Clinical psychology review.  
31 *Clin Psychol Rev* 2017;58:59-75.  
32  
33  
34  
35  
36  
37  
38  
39  
40  
41  
42  
43  
44  
45  
46  
47  
48  
49  
50  
51  
52  
53  
54  
55  
56  
57  
58  
59  
60

Figure 1. Study flow diagram for HORYZONS.

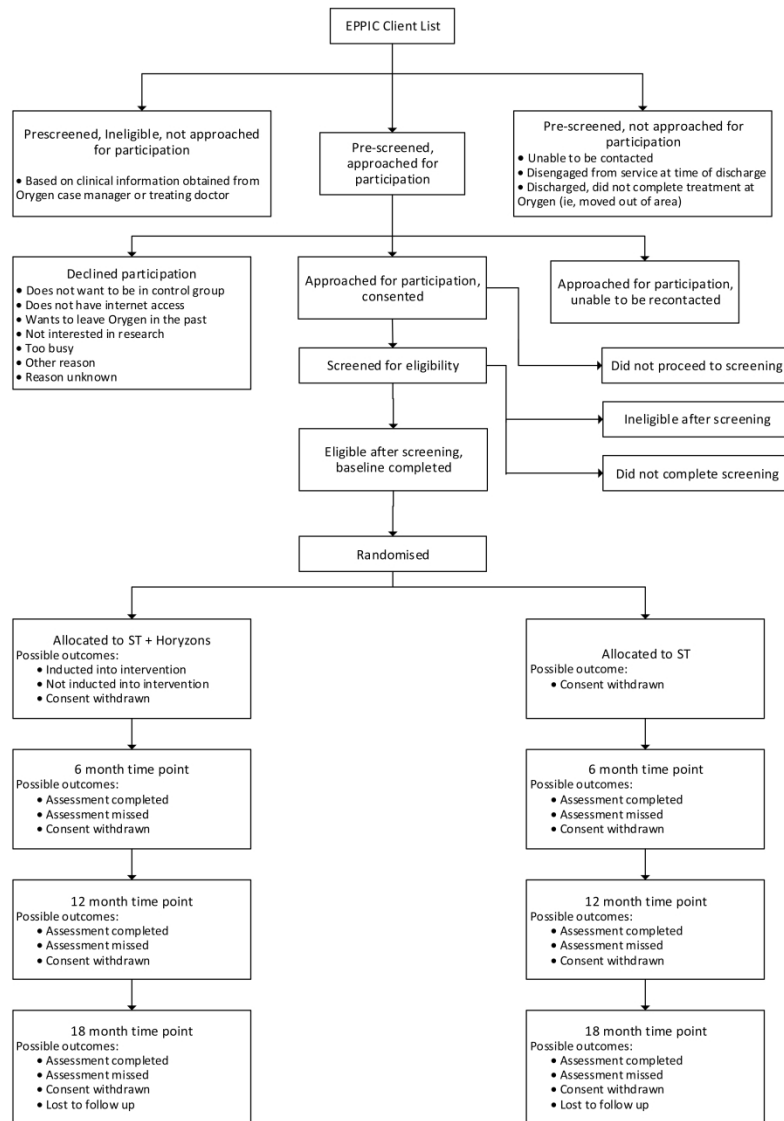

Horyzons recruitment and allocation procedure

318x473mm (300 x 300 DPI)

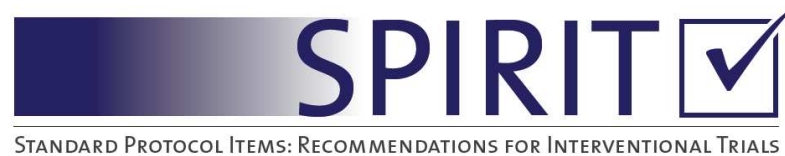

SPIRIT 2013 Checklist: Recommended items to address in a clinical trial protocol and related documents\*

| Section/item                      | Item No | Description                                                                                                                                                                                                                                                                              | Addressed on page number |
|-----------------------------------|---------|------------------------------------------------------------------------------------------------------------------------------------------------------------------------------------------------------------------------------------------------------------------------------------------|--------------------------|
| <b>Administrative information</b> |         |                                                                                                                                                                                                                                                                                          |                          |
| Title                             | 1       | Descriptive title identifying the study design, population, interventions, and, if applicable, trial acronym                                                                                                                                                                             | _____1__                 |
| Trial registration                | 2a      | Trial identifier and registry name. If not yet registered, name of intended registry                                                                                                                                                                                                     | _____4__                 |
|                                   | 2b      | All items from the World Health Organization Trial Registration Data Set                                                                                                                                                                                                                 | _____N/A__               |
| Protocol version                  | 3       | Date and version identifier                                                                                                                                                                                                                                                              | _____4__                 |
| Funding                           | 4       | Sources and types of financial, material, and other support                                                                                                                                                                                                                              | _____18__                |
| Roles and responsibilities        | 5a      | Names, affiliations, and roles of protocol contributors                                                                                                                                                                                                                                  | _____22__                |
|                                   | 5b      | Name and contact information for the trial sponsor                                                                                                                                                                                                                                       | _____23__                |
|                                   | 5c      | Role of study sponsor and funders, if any, in study design; collection, management, analysis, and interpretation of data; writing of the report; and the decision to submit the report for publication, including whether they will have ultimate authority over any of these activities | _____23__                |
|                                   | 5d      | Composition, roles, and responsibilities of the coordinating centre, steering committee, endpoint adjudication committee, data management team, and other individuals or groups overseeing the trial, if applicable (see Item 21a for data monitoring committee)                         | _____N/A__               |

1  
2  
3  
4  
5  
6  
7  
8  
9  
10  
11  
12  
13  
14  
15  
16  
17  
18  
19  
20  
21  
22  
23  
24  
25  
26  
27  
28  
29  
30  
31  
32  
33  
34  
35  
36  
37  
38  
39  
40  
41  
42  
43  
44  
45  
46  
47

**Introduction**

|                          |    |                                                                                                                                                                                                           |     |
|--------------------------|----|-----------------------------------------------------------------------------------------------------------------------------------------------------------------------------------------------------------|-----|
| Background and rationale | 6a | Description of research question and justification for undertaking the trial, including summary of relevant studies (published and unpublished) examining benefits and harms for each intervention        | 8-9 |
|                          | 6b | Explanation for choice of comparators                                                                                                                                                                     | 9   |
| Objectives               | 7  | Specific objectives or hypotheses                                                                                                                                                                         | 9   |
| Trial design             | 8  | Description of trial design including type of trial (eg, parallel group, crossover, factorial, single group), allocation ratio, and framework (eg, superiority, equivalence, noninferiority, exploratory) | 10  |

**Methods: Participants, interventions, and outcomes**

|                      |     |                                                                                                                                                                                                                                                                                                                                                                                |       |
|----------------------|-----|--------------------------------------------------------------------------------------------------------------------------------------------------------------------------------------------------------------------------------------------------------------------------------------------------------------------------------------------------------------------------------|-------|
| Study setting        | 9   | Description of study settings (eg, community clinic, academic hospital) and list of countries where data will be collected. Reference to where list of study sites can be obtained                                                                                                                                                                                             | 10    |
| Eligibility criteria | 10  | Inclusion and exclusion criteria for participants. If applicable, eligibility criteria for study centres and individuals who will perform the interventions (eg, surgeons, psychotherapists)                                                                                                                                                                                   | 10    |
| Interventions        | 11a | Interventions for each group with sufficient detail to allow replication, including how and when they will be administered                                                                                                                                                                                                                                                     | 11-14 |
|                      | 11b | Criteria for discontinuing or modifying allocated interventions for a given trial participant (eg, drug dose change in response to harms, participant request, or improving/worsening disease)                                                                                                                                                                                 | 17    |
|                      | 11c | Strategies to improve adherence to intervention protocols, and any procedures for monitoring adherence (eg, drug tablet return, laboratory tests)                                                                                                                                                                                                                              | 14    |
|                      | 11d | Relevant concomitant care and interventions that are permitted or prohibited during the trial                                                                                                                                                                                                                                                                                  | 14    |
| Outcomes             | 12  | Primary, secondary, and other outcomes, including the specific measurement variable (eg, systolic blood pressure), analysis metric (eg, change from baseline, final value, time to event), method of aggregation (eg, median, proportion), and time point for each outcome. Explanation of the clinical relevance of chosen efficacy and harm outcomes is strongly recommended | 14-6  |
| Participant timeline | 13  | Time schedule of enrolment, interventions (including any run-ins and washouts), assessments, and visits for participants. A schematic diagram is highly recommended (see Figure)                                                                                                                                                                                               | N/A   |

1  
2  
3 Sample size 14 Estimated number of participants needed to achieve study objectives and how it was determined, including \_\_\_\_\_20\_\_\_\_\_  
4 clinical and statistical assumptions supporting any sample size calculations

5  
6 Recruitment 15 Strategies for achieving adequate participant enrolment to reach target sample size \_\_\_\_\_11\_\_\_\_\_  
7

8 **Methods: Assignment of interventions (for controlled trials)**  
9

10 Allocation:

11  
12 Sequence generation 16a Method of generating the allocation sequence (eg, computer-generated random numbers), and list of any \_\_\_\_\_11\_\_\_\_\_  
13 factors for stratification. To reduce predictability of a random sequence, details of any planned restriction  
14 (eg, blocking) should be provided in a separate document that is unavailable to those who enrol participants  
15 or assign interventions  
16

17 Allocation concealment mechanism 16b Mechanism of implementing the allocation sequence (eg, central telephone; sequentially numbered, \_\_\_\_\_11\_\_\_\_\_  
18 opaque, sealed envelopes), describing any steps to conceal the sequence until interventions are assigned  
19  
20

21 Implementation 16c Who will generate the allocation sequence, who will enrol participants, and who will assign participants to \_\_\_\_\_11\_\_\_\_\_  
22 interventions  
23

24 Blinding (masking) 17a Who will be blinded after assignment to interventions (eg, trial participants, care providers, outcome \_\_\_\_\_11\_\_\_\_\_  
25 assessors, data analysts), and how  
26

27 17b If blinded, circumstances under which unblinding is permissible, and procedure for revealing a participant's \_\_\_\_\_N/A\_\_\_\_\_  
28 allocated intervention during the trial  
29  
30

31 **Methods: Data collection, management, and analysis**  
32

33 Data collection methods 18a Plans for assessment and collection of outcome, baseline, and other trial data, including any related \_\_\_\_\_15\_\_\_\_\_  
34 processes to promote data quality (eg, duplicate measurements, training of assessors) and a description of  
35 study instruments (eg, questionnaires, laboratory tests) along with their reliability and validity, if known.  
36 Reference to where data collection forms can be found, if not in the protocol  
37

38 18b Plans to promote participant retention and complete follow-up, including list of any outcome data to be \_\_\_\_\_N/A\_\_\_\_\_  
39 collected for participants who discontinue or deviate from intervention protocols  
40  
41  
42  
43  
44

1  
2  
3 Data management 19 Plans for data entry, coding, security, and storage, including any related processes to promote data quality \_\_\_\_\_ 21 \_\_\_\_\_  
4 (eg, double data entry; range checks for data values). Reference to where details of data management  
5 procedures can be found, if not in the protocol  
6  
7 Statistical methods 20a Statistical methods for analysing primary and secondary outcomes. Reference to where other details of the \_\_\_\_\_ 19 \_\_\_\_\_  
8 statistical analysis plan can be found, if not in the protocol  
9  
10 20b Methods for any additional analyses (eg, subgroup and adjusted analyses) \_\_\_\_\_ N/A \_\_\_\_\_  
11  
12 20c Definition of analysis population relating to protocol non-adherence (eg, as randomised analysis), and any  
13 statistical methods to handle missing data (eg, multiple imputation) \_\_\_\_\_ 19 \_\_\_\_\_  
14

15 **Methods: Monitoring**

16  
17 Data monitoring 21a Composition of data monitoring committee (DMC); summary of its role and reporting structure; statement of \_\_\_\_\_ 22 \_\_\_\_\_  
18 whether it is independent from the sponsor and competing interests; and reference to where further details  
19 about its charter can be found, if not in the protocol. Alternatively, an explanation of why a DMC is not  
20 needed  
21  
22 21b Description of any interim analyses and stopping guidelines, including who will have access to these interim \_\_\_\_\_ N/A \_\_\_\_\_  
23 results and make the final decision to terminate the trial  
24  
25 Harms 22 Plans for collecting, assessing, reporting, and managing solicited and spontaneously reported adverse \_\_\_\_\_ N/A \_\_\_\_\_  
26 events and other unintended effects of trial interventions or trial conduct  
27  
28 Auditing 23 Frequency and procedures for auditing trial conduct, if any, and whether the process will be independent \_\_\_\_\_ N/A \_\_\_\_\_  
29 from investigators and the sponsor  
30  
31

32 **Ethics and dissemination**

33  
34 Research ethics 24 Plans for seeking research ethics committee/institutional review board (REC/IRB) approval \_\_\_\_\_ 22 \_\_\_\_\_  
35 approval  
36  
37 Protocol 25 Plans for communicating important protocol modifications (eg, changes to eligibility criteria, outcomes, \_\_\_\_\_ N/A \_\_\_\_\_  
38 amendments analyses) to relevant parties (eg, investigators, REC/IRBs, trial participants, trial registries, journals,  
39 regulators)  
40  
41  
42  
43  
44  
45  
46  
47



|    |                               |     |                                                                                                                                                                                                                                                                                     |                 |
|----|-------------------------------|-----|-------------------------------------------------------------------------------------------------------------------------------------------------------------------------------------------------------------------------------------------------------------------------------------|-----------------|
| 1  |                               |     |                                                                                                                                                                                                                                                                                     |                 |
| 2  |                               |     |                                                                                                                                                                                                                                                                                     |                 |
| 3  | Consent or assent             | 26a | Who will obtain informed consent or assent from potential trial participants or authorised surrogates, and how (see Item 32)                                                                                                                                                        | _____11_____    |
| 4  |                               |     |                                                                                                                                                                                                                                                                                     |                 |
| 5  |                               |     |                                                                                                                                                                                                                                                                                     |                 |
| 6  |                               | 26b | Additional consent provisions for collection and use of participant data and biological specimens in ancillary studies, if applicable                                                                                                                                               | _____16_____    |
| 7  |                               |     |                                                                                                                                                                                                                                                                                     |                 |
| 8  | Confidentiality               | 27  | How personal information about potential and enrolled participants will be collected, shared, and maintained in order to protect confidentiality before, during, and after the trial                                                                                                | _____18-19_____ |
| 9  |                               |     |                                                                                                                                                                                                                                                                                     |                 |
| 10 |                               |     |                                                                                                                                                                                                                                                                                     |                 |
| 11 | Declaration of interests      | 28  | Financial and other competing interests for principal investigators for the overall trial and each study site                                                                                                                                                                       | _____23_____    |
| 12 |                               |     |                                                                                                                                                                                                                                                                                     |                 |
| 13 |                               |     |                                                                                                                                                                                                                                                                                     |                 |
| 14 | Access to data                | 29  | Statement of who will have access to the final trial dataset, and disclosure of contractual agreements that limit such access for investigators                                                                                                                                     | _____N/A_____   |
| 15 |                               |     |                                                                                                                                                                                                                                                                                     |                 |
| 16 |                               |     |                                                                                                                                                                                                                                                                                     |                 |
| 17 | Ancillary and post-trial care | 30  | Provisions, if any, for ancillary and post-trial care, and for compensation to those who suffer harm from trial participation                                                                                                                                                       | _____N/A_____   |
| 18 |                               |     |                                                                                                                                                                                                                                                                                     |                 |
| 19 |                               |     |                                                                                                                                                                                                                                                                                     |                 |
| 20 | Dissemination policy          | 31a | Plans for investigators and sponsor to communicate trial results to participants, healthcare professionals, the public, and other relevant groups (eg, via publication, reporting in results databases, or other data sharing arrangements), including any publication restrictions | _____N/A_____   |
| 21 |                               |     |                                                                                                                                                                                                                                                                                     |                 |
| 22 |                               |     |                                                                                                                                                                                                                                                                                     |                 |
| 23 |                               |     |                                                                                                                                                                                                                                                                                     |                 |
| 24 |                               |     |                                                                                                                                                                                                                                                                                     |                 |
| 25 |                               | 31b | Authorship eligibility guidelines and any intended use of professional writers                                                                                                                                                                                                      | _____N/A_____   |
| 26 |                               |     |                                                                                                                                                                                                                                                                                     |                 |
| 27 |                               | 31c | Plans, if any, for granting public access to the full protocol, participant-level dataset, and statistical code                                                                                                                                                                     | _____N/A_____   |
| 28 |                               |     |                                                                                                                                                                                                                                                                                     |                 |
| 29 | <b>Appendices</b>             |     |                                                                                                                                                                                                                                                                                     |                 |
| 30 |                               |     |                                                                                                                                                                                                                                                                                     |                 |
| 31 | Informed consent materials    | 32  | Model consent form and other related documentation given to participants and authorised surrogates                                                                                                                                                                                  | _____N/A_____   |
| 32 |                               |     |                                                                                                                                                                                                                                                                                     |                 |
| 33 |                               |     |                                                                                                                                                                                                                                                                                     |                 |
| 34 | Biological specimens          | 33  | Plans for collection, laboratory evaluation, and storage of biological specimens for genetic or molecular analysis in the current trial and for future use in ancillary studies, if applicable                                                                                      | _____N/A_____   |
| 35 |                               |     |                                                                                                                                                                                                                                                                                     |                 |
| 36 |                               |     |                                                                                                                                                                                                                                                                                     |                 |

37 \*It is strongly recommended that this checklist be read in conjunction with the SPIRIT 2013 Explanation & Elaboration for important clarification on the items.  
 38 Amendments to the protocol should be tracked and dated. The SPIRIT checklist is copyrighted by the SPIRIT Group under the Creative Commons  
 39 "[Attribution-NonCommercial-NoDerivs 3.0 Unported](https://creativecommons.org/licenses/by-nc-nd/3.0/)" license.  
 40

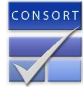

## CONSORT 2010 checklist of information to include when reporting a randomised trial\*

| Section/Topic                    | Item No | Checklist item                                                                                                                                                                              | Reported on page No |
|----------------------------------|---------|---------------------------------------------------------------------------------------------------------------------------------------------------------------------------------------------|---------------------|
| <b>Title and abstract</b>        |         |                                                                                                                                                                                             |                     |
|                                  | 1a      | Identification as a randomised trial in the title                                                                                                                                           | Page 1              |
|                                  | 1b      | Structured summary of trial design, methods, results, and conclusions (for specific guidance see CONSORT for abstracts)                                                                     | Page 2              |
| <b>Introduction</b>              |         |                                                                                                                                                                                             |                     |
| Background and objectives        | 2a      | Scientific background and explanation of rationale                                                                                                                                          | Pages 3-6           |
|                                  | 2b      | Specific objectives or hypotheses                                                                                                                                                           | Pages 6-7           |
| <b>Methods</b>                   |         |                                                                                                                                                                                             |                     |
| Trial design                     | 3a      | Description of trial design (such as parallel, factorial) including allocation ratio                                                                                                        | Pages 7, 9          |
|                                  | 3b      | Important changes to methods after trial commencement (such as eligibility criteria), with reasons                                                                                          | NA                  |
| Participants                     | 4a      | Eligibility criteria for participants                                                                                                                                                       | Page 8              |
|                                  | 4b      | Settings and locations where the data were collected                                                                                                                                        | Page 7              |
| Interventions                    | 5       | The interventions for each group with sufficient details to allow replication, including how and when they were actually administered                                                       | Pages 9-13          |
| Outcomes                         | 6a      | Completely defined pre-specified primary and secondary outcome measures, including how and when they were assessed                                                                          | Pages 15-18         |
|                                  | 6b      | Any changes to trial outcomes after the trial commenced, with reasons                                                                                                                       | Pages 16-17         |
| Sample size                      | 7a      | How sample size was determined                                                                                                                                                              | Page 20             |
|                                  | 7b      | When applicable, explanation of any interim analyses and stopping guidelines                                                                                                                | NA                  |
| <b>Randomisation:</b>            |         |                                                                                                                                                                                             |                     |
| Sequence generation              | 8a      | Method used to generate the random allocation sequence                                                                                                                                      | Page 9              |
|                                  | 8b      | Type of randomisation; details of any restriction (such as blocking and block size)                                                                                                         | Page 9              |
| Allocation concealment mechanism | 9       | Mechanism used to implement the random allocation sequence (such as sequentially numbered containers), describing any steps taken to conceal the sequence until interventions were assigned | Page 9              |
| Implementation                   | 10      | Who generated the random allocation sequence, who enrolled participants, and who assigned participants to interventions                                                                     | Page 9              |
| Blinding                         | 11a     | If done, who was blinded after assignment to interventions (for example, participants, care providers, those assessing outcomes) and how                                                    | Page 9, 21          |

|                                                      |     |                                                                                                                                                   |             |
|------------------------------------------------------|-----|---------------------------------------------------------------------------------------------------------------------------------------------------|-------------|
|                                                      | 11b | If relevant, description of the similarity of interventions                                                                                       | NA          |
| Statistical methods                                  | 12a | Statistical methods used to compare groups for primary and secondary outcomes                                                                     | Pages 19-21 |
|                                                      | 12b | Methods for additional analyses, such as subgroup analyses and adjusted analyses                                                                  | Pages 19-21 |
| <b>Results</b>                                       |     |                                                                                                                                                   |             |
| Participant flow (a diagram is strongly recommended) | 13a | For each group, the numbers of participants who were randomly assigned, received intended treatment, and were analysed for the primary outcome    | NA          |
|                                                      | 13b | For each group, losses and exclusions after randomisation, together with reasons                                                                  | NA          |
| Recruitment                                          | 14a | Dates defining the periods of recruitment and follow-up                                                                                           | NA          |
|                                                      | 14b | Why the trial ended or was stopped                                                                                                                | NA          |
| Baseline data                                        | 15  | A table showing baseline demographic and clinical characteristics for each group                                                                  | NA          |
| Numbers analysed                                     | 16  | For each group, number of participants (denominator) included in each analysis and whether the analysis was by original assigned groups           | NA          |
| Outcomes and estimation                              | 17a | For each primary and secondary outcome, results for each group, and the estimated effect size and its precision (such as 95% confidence interval) | NA          |
|                                                      | 17b | For binary outcomes, presentation of both absolute and relative effect sizes is recommended                                                       | NA          |
| Ancillary analyses                                   | 18  | Results of any other analyses performed, including subgroup analyses and adjusted analyses, distinguishing pre-specified from exploratory         | NA          |
| Harms                                                | 19  | All important harms or unintended effects in each group (for specific guidance see CONSORT for harms)                                             | NA          |
| <b>Discussion</b>                                    |     |                                                                                                                                                   |             |
| Limitations                                          | 20  | Trial limitations, addressing sources of potential bias, imprecision, and, if relevant, multiplicity of analyses                                  | Pages 3, 23 |
| Generalisability                                     | 21  | Generalisability (external validity, applicability) of the trial findings                                                                         | NA          |
| Interpretation                                       | 22  | Interpretation consistent with results, balancing benefits and harms, and considering other relevant evidence                                     | NA          |
| <b>Other information</b>                             |     |                                                                                                                                                   |             |
| Registration                                         | 23  | Registration number and name of trial registry                                                                                                    | Page 2      |
| Protocol                                             | 24  | Where the full trial protocol can be accessed, if available                                                                                       | NA          |
| Funding                                              | 25  | Sources of funding and other support (such as supply of drugs), role of funders                                                                   | Page 23     |

\*We strongly recommend reading this statement in conjunction with the CONSORT 2010 Explanation and Elaboration for important clarifications on all the items. If relevant, we also recommend reading CONSORT extensions for cluster randomised trials, non-inferiority and equivalence trials, non-pharmacological treatments, herbal interventions, and pragmatic trials. Additional extensions are forthcoming: for those and for up to date references relevant to this checklist, see [www.consort-statement.org](http://www.consort-statement.org).
