# Supplementary material for: HORYZONS trial: protocol for a randomised controlled trial of a moderated online social therapy to maintain treatment effects from first-episode psychosis services
Source: PubMed Central journal article supplement — BMJ Open. 2019 Feb 3;9(2):e024104. doi: 10.1136/bmjopen-2018-024104 (PMC6368148; doi:10.1136/bmjopen-2018-024104), 2019-02-03
Supplement: bmjopen-2018-024104.reviewer_comments.pdf [file bmjopen-2018-024104.reviewer_comments.pdf]

## PEER REVIEW HISTORY

BMJ Open publishes all reviews undertaken for accepted manuscripts. Reviewers are asked to complete a checklist review form (<http://bmjopen.bmj.com/site/about/resources/checklist.pdf>) and are provided with free text boxes to elaborate on their assessment. These free text comments are reproduced below.

## ARTICLE DETAILS

|                            |                                                                                                                                                                                                                                                                                                                                                                                                                                                                 |
|----------------------------|-----------------------------------------------------------------------------------------------------------------------------------------------------------------------------------------------------------------------------------------------------------------------------------------------------------------------------------------------------------------------------------------------------------------------------------------------------------------|
| <b>TITLE (PROVISIONAL)</b> | The Horyzons trial: Protocol for a Randomised Controlled Trial of a Moderated Online Social Therapy to Maintain Treatment Effects from First Episode Psychosis Services                                                                                                                                                                                                                                                                                         |
| <b>AUTHORS</b>             | Alvarez-Jimenez, Mario; Bendall, Sarah; Koval, Peter; Rice, Simon; Cagliarini, Daniela; Valentine, Lee; D'Alfonso, Simon; Miles, Christopher; Russon, Penni; Phillips, Jess; Lederman, Reeve; Wadley, Greg; Killackey, Eoin; Santesteban-Echarri, Olga; Mihalopoulos, Cathrine; Herrman, Helen; Gonzalez-Blanch, Cesar; Gilbertson, Tamsyn; Lal, Shalini; Chambers, Richard; Daglas, Rothanthi; Latorre, Cristina; Cotton, Sue; McGorry, Patrick; Gleeson, John |

This article was not externally reviewed at BMJ Open. Protocols that have been independently assessed prior to submission to BMJ Open are usually fast-tracked to publication on the grounds that further substantial changes will not be possible. This independent assessment will usually be external, independent review for both a substantial grant award from a non-commercial or government funder and ethics approval.
